# Supplementary material for: System level characterization of small molecule drugs and their affected long noncoding RNAs
Source: Aging (Albany NY). 2019 Dec 18;11(24):12428–51. doi: 10.18632/aging.102581 (PMC6949102; doi:10.18632/aging.102581)
Supplement: Supplementary Dataset 1 [file aging-11-102581-s003..csv]

SUID	interaction	name	selected	shared interaction	shared name
3392	-1.118283	molindone (-1.118283) RP11-74N20.1.1	false	-1.118283	molindone (-1.118283) RP11-74N20.1.1
1693	-1.156953	valinomycin (-1.156953) RP11-574K11.5.1	false	-1.156953	valinomycin (-1.156953) RP11-574K11.5.1
3617	-1.233968	harmine (-1.233968) DLEU2	false	-1.233968	harmine (-1.233968) DLEU2
3022	1.264994	mestranol (1.264994) LINC00667	false	1.264994	mestranol (1.264994) LINC00667
4867	-1.201289	vorinostat (-1.201289) RP11-1148L6.5.1	false	-1.201289	vorinostat (-1.201289) RP11-1148L6.5.1
4556	1.060544	mebhydrolin (1.060544) CASP8AP2	false	1.060544	mebhydrolin (1.060544) CASP8AP2
1458	1.084815	alsterpaullone (1.084815) MT1P3	false	1.084815	alsterpaullone (1.084815) MT1P3
4455	1.126748	homatropine (1.126748) RP11-667K14.3	false	1.126748	homatropine (1.126748) RP11-667K14.3
3407	-1.066401	etamsylate (-1.066401) LINC00342	false	-1.066401	etamsylate (-1.066401) LINC00342
1533	1.212498	hydroxyzine (1.212498) RP11-203B9.4.1	false	1.212498	hydroxyzine (1.212498) RP11-203B9.4.1
1944	1.207818	Prestwick-1100 (1.207818) RP11-1148L6.5.1	false	1.207818	Prestwick-1100 (1.207818) RP11-1148L6.5.1
5332	-1.032802	diflunisal (-1.032802) LINC00483	false	-1.032802	diflunisal (-1.032802) LINC00483
4137	-1.059152	telenzepine (-1.059152) RP11-1148L6.5.1	false	-1.059152	telenzepine (-1.059152) RP11-1148L6.5.1
3149	-1.14691	trichlormethiazide (-1.14691) MEG3	false	-1.14691	trichlormethiazide (-1.14691) MEG3
2422	-1.618332	galantamine (-1.618332) RP5-1068E13.3.1	false	-1.618332	galantamine (-1.618332) RP5-1068E13.3.1
4235	-1.048573	kawain (-1.048573) AC005546.2	false	-1.048573	kawain (-1.048573) AC005546.2
5395	-1.02463	idoxuridine (-1.02463) CYP4F8	false	-1.02463	idoxuridine (-1.02463) CYP4F8
5152	-1.001651	fusidic acid (-1.001651) RP11-612B6.2.1	false	-1.001651	fusidic acid (-1.001651) RP11-612B6.2.1
5728	1.42293075	trichostatin A (1.42293075) AC159540.1.1	false	1.42293075	trichostatin A (1.42293075) AC159540.1.1
2591	-1.040649	flutamide (-1.040649) FAM182A	false	-1.040649	flutamide (-1.040649) FAM182A
3122	-1.309896	simvastatin (-1.309896) RP5-1068E13.3.1	false	-1.309896	simvastatin (-1.309896) RP5-1068E13.3.1
2320	-1.829867	naftopidil (-1.829867) RP11-148B6.1.1	false	-1.829867	naftopidil (-1.829867) RP11-148B6.1.1
2864	-1.130154	albendazole (-1.130154) RP11-1148L6.5.1	false	-1.130154	albendazole (-1.130154) RP11-1148L6.5.1
2485	1.188585	tobramycin (1.188585) RP11-395B7.7.1	false	1.188585	tobramycin (1.188585) RP11-395B7.7.1
1728	-1.107752	butamben (-1.107752) RP11-1148L6.5.1	false	-1.107752	butamben (-1.107752) RP11-1148L6.5.1
5461	-1.31138	pyrimethamine (-1.31138) RP5-1068E13.3.1	false	-1.31138	pyrimethamine (-1.31138) RP5-1068E13.3.1
3623	1.051416	pyrithyldione (1.051416) FAM182A	false	1.051416	pyrithyldione (1.051416) FAM182A
4948	-1.253821	11-aminocephalosporanic acid (-1.253821) C9orf31	false	-1.253821	11-aminocephalosporanic acid (-1.253821) C9orf31
2198	-1.274501	isoxsuprine (-1.274501) RP11-74N20.1.1	false	-1.274501	isoxsuprine (-1.274501) RP11-74N20.1.1
3635	1.003443	iopamidol (1.003443) AC006042.6.1	false	1.003443	iopamidol (1.003443) AC006042.6.1
5922	-1.074316	novobiocin (-1.074316) RP11-394A14.4	false	-1.074316	novobiocin (-1.074316) RP11-394A14.4
2413	-1.74536	galantamine (-1.74536) RP3-522P13.3.1	false	-1.74536	galantamine (-1.74536) RP3-522P13.3.1
4294	-1.043706	helveticoside (-1.043706) SNHG3	false	-1.043706	helveticoside (-1.043706) SNHG3
5011	-1.016858	calcium pantothenate (-1.016858) RP11-74N20.1.1	false	-1.016858	calcium pantothenate (-1.016858) RP11-74N20.1.1
3653	-1.608894	securinine (-1.608894) RP11-612B6.2.1	false	-1.608894	securinine (-1.608894) RP11-612B6.2.1
4497	-1.370854	primaquine (-1.370854) MCM3AP-AS1	false	-1.370854	primaquine (-1.370854) MCM3AP-AS1
3693	-1.081656	cicloheximide (-1.081656) RP11-649A18.7	false	-1.081656	cicloheximide (-1.081656) RP11-649A18.7
2475	-1.42356	carbarsone (-1.42356) RP11-1148L6.5.1	false	-1.42356	carbarsone (-1.42356) RP11-1148L6.5.1
1683	-1.516453	H-7 (-1.516453) ZNF518A	false	-1.516453	H-7 (-1.516453) ZNF518A
3323	1.667299	epitiostanol (1.667299) RP11-499E18.1.1	false	1.667299	epitiostanol (1.667299) RP11-499E18.1.1
6031	1.044284	sulindac sulfide (1.044284) RP11-394A14.4	false	1.044284	sulindac sulfide (1.044284) RP11-394A14.4
4718	-1.4022525	ouabain (-1.4022525) RP11-259N19.1	false	-1.4022525	ouabain (-1.4022525) RP11-259N19.1
5763	1.517696	clopamide (1.517696) RP4-802A10.1	false	1.517696	clopamide (1.517696) RP4-802A10.1
3078	-1.01605	reserpine (-1.01605) RP11-106M3.3.1	false	-1.01605	reserpine (-1.01605) RP11-106M3.3.1
3856	1.585815	medrysone (1.585815) RP11-148B6.1.1	false	1.585815	medrysone (1.585815) RP11-148B6.1.1
4343	3.118455	solanine (3.118455) KB-1592A4.15.1	false	3.118455	solanine (3.118455) KB-1592A4.15.1
4266	2.542517	lycorine (2.542517) MAP3K14	false	2.542517	lycorine (2.542517) MAP3K14
4681	-1.601187	anisomycin (-1.601187) AC004447.2	false	-1.601187	anisomycin (-1.601187) AC004447.2
4179	-1.187375	nefopam (-1.187375) RP11-517A5.4	false	-1.187375	nefopam (-1.187375) RP11-517A5.4
1927	1.037237	labetalol (1.037237) RP11-667K14.3	false	1.037237	labetalol (1.037237) RP11-667K14.3
3718	-1.142071	ebselen (-1.142071) RP11-612B6.2.1	false	-1.142071	ebselen (-1.142071) RP11-612B6.2.1
3774	-1.125656	proadifen (-1.125656) RP11-148B6.1.1	false	-1.125656	proadifen (-1.125656) RP11-148B6.1.1
2128	-1.039044	minaprine (-1.039044) AC012074.2.1	false	-1.039044	minaprine (-1.039044) AC012074.2.1
2278	1.229274	lumicolchicine (1.229274) LINC00667	false	1.229274	lumicolchicine (1.229274) LINC00667
3459	1.406969	colistin (1.406969) RP11-667K14.3	false	1.406969	colistin (1.406969) RP11-667K14.3
3885	1.059105	strophanthidin (1.059105) RP11-20D14.6.1	false	1.059105	strophanthidin (1.059105) RP11-20D14.6.1
5107	-1.452981	lanatoside C (-1.452981) RP11-259N19.1	false	-1.452981	lanatoside C (-1.452981) RP11-259N19.1
4103	-1.026565	minocycline (-1.026565) LL22NC03-2H8.5	false	-1.026565	minocycline (-1.026565) LL22NC03-2H8.5
3819	-1.046361	flunixin (-1.046361) FGD5-AS1	false	-1.046361	flunixin (-1.046361) FGD5-AS1
2319	-1.460205	naftopidil (-1.460205) RP11-286E11.2.1	false	-1.460205	naftopidil (-1.460205) RP11-286E11.2.1
4328	-1.558177	sulfamerazine (-1.558177) RP11-1148L6.5.1	false	-1.558177	sulfamerazine (-1.558177) RP11-1148L6.5.1
4225	-1.03173	tropicamide (-1.03173) RP11-517A5.4	false	-1.03173	tropicamide (-1.03173) RP11-517A5.4
4030	-1.6725495	bisacodyl (-1.6725495) AD000090.2.1	false	-1.6725495	bisacodyl (-1.6725495) AD000090.2.1
2292	-1.434238	lumicolchicine (-1.434238) DGCR5	false	-1.434238	lumicolchicine (-1.434238) DGCR5
3441	1.127737	colistin (1.127737) RP11-499E18.1.1	false	1.127737	colistin (1.127737) RP11-499E18.1.1
1897	-1.090592	griseofulvin (-1.090592) AC005546.2	false	-1.090592	griseofulvin (-1.090592) AC005546.2
2356	1.154735	conessine (1.154735) RP11-203B9.4.1	false	1.154735	conessine (1.154735) RP11-203B9.4.1
4469	-1.364907	8-azaguanine (-1.364907) SNHG3	false	-1.364907	8-azaguanine (-1.364907) SNHG3
3510	1.280432	benperidol (1.280432) FGD5-AS1	false	1.280432	benperidol (1.280432) FGD5-AS1
5714	1.883268	trichostatin A (1.883268) CECR7	false	1.883268	trichostatin A (1.883268) CECR7
5951	-1.217936	tanespimycin (-1.217936) FAM182A	false	-1.217936	tanespimycin (-1.217936) FAM182A
3552	-1.125375	salsolidin (-1.125375) RP11-474N8.5.1	false	-1.125375	salsolidin (-1.125375) RP11-474N8.5.1
2938	1.6173595	luteolin (1.6173595) RP11-49C24.1.1	false	1.6173595	luteolin (1.6173595) RP11-49C24.1.1
3566	-1.380373	salsolidin (-1.380373) LINC00483	false	-1.380373	salsolidin (-1.380373) LINC00483
3365	-1.510461	proscillaridin (-1.510461) WT1-AS	false	-1.510461	proscillaridin (-1.510461) WT1-AS
3359	-1.536489	proscillaridin (-1.536489) LINC00341	false	-1.536489	proscillaridin (-1.536489) LINC00341
4961	-1.215542	propantheline bromide (-1.215542) RP11-655M14.13.1	false	-1.215542	propantheline bromide (-1.215542) RP11-655M14.13.1
5535	1.276813	sulfathiazole (1.276813) LINC00339	false	1.276813	sulfathiazole (1.276813) LINC00339
5262	1.63893	chlorhexidine (1.63893) IGF2-AS	false	1.63893	chlorhexidine (1.63893) IGF2-AS
4095	-1.400722	bumetanide (-1.400722) RP11-1148L6.5.1	false	-1.400722	bumetanide (-1.400722) RP11-1148L6.5.1
3694	-1.1265455	cicloheximide (-1.1265455) LINC00094	false	-1.1265455	cicloheximide (-1.1265455) LINC00094
1605	-1.049308	F0447-0125 (-1.049308) RP11-152N13.16	false	-1.049308	F0447-0125 (-1.049308) RP11-152N13.16
5183	1.013816	danazol (1.013816) AC012065.7.1	false	1.013816	danazol (1.013816) AC012065.7.1
2601	-1.232819	cloperastine (-1.232819) RP11-612B6.2.1	false	-1.232819	cloperastine (-1.232819) RP11-612B6.2.1
6040	1.205851	sulindac (1.205851) RP11-394A14.4	false	1.205851	sulindac (1.205851) RP11-394A14.4
5827	1.755105	chlorzoxazone (1.755105) RP4-802A10.1	false	1.755105	chlorzoxazone (1.755105) RP4-802A10.1
5188	1.072434	danazol (1.072434) RP5-1184F4.5.1	false	1.072434	danazol (1.072434) RP5-1184F4.5.1
4419	-1.003674	triflupromazine (-1.003674) RP11-395B7.2.1	false	-1.003674	triflupromazine (-1.003674) RP11-395B7.2.1
2070	1.236966	letrozole (1.236966) U47924.30	false	1.236966	letrozole (1.236966) U47924.30
2800	-1.019275	biotin (-1.019275) RP11-655M14.13.1	false	-1.019275	biotin (-1.019275) RP11-655M14.13.1
6020	1.0849415	estradiol (1.0849415) RP11-403P17.4.1	false	1.0849415	estradiol (1.0849415) RP11-403P17.4.1
3131	-1.152031	trichlormethiazide (-1.152031) RP1-302G2.5	false	-1.152031	trichlormethiazide (-1.152031) RP1-302G2.5
2953	-1.231233	sulconazole (-1.231233) RP11-403P17.4.1	false	-1.231233	sulconazole (-1.231233) RP11-403P17.4.1
2752	-1.003823	equilin (-1.003823) RP11-395B7.7.1	false	-1.003823	equilin (-1.003823) RP11-395B7.7.1
2275	-1.403608	lumicolchicine (-1.403608) DGCR11	false	-1.403608	lumicolchicine (-1.403608) DGCR11
2310	-1.144541	lumicolchicine (-1.144541) LINC00483	false	-1.144541	lumicolchicine (-1.144541) LINC00483
5142	1.308511	N-acetyl-L-aspartic acid (1.308511) LL22NC03-2H8.5	false	1.308511	N-acetyl-L-aspartic acid (1.308511) LL22NC03-2H8.5
5086	-1.057645	niflumic acid (-1.057645) LL22NC03-2H8.5	false	-1.057645	niflumic acid (-1.057645) LL22NC03-2H8.5
3280	-1.144349	sanguinarine (-1.144349) KB-431C1.4.1	false	-1.144349	sanguinarine (-1.144349) KB-431C1.4.1
2013	-1.035779	Prestwick-967 (-1.035779) SNHG3	false	-1.035779	Prestwick-967 (-1.035779) SNHG3
5012	1.004999	calcium pantothenate (1.004999) DLEU2	false	1.004999	calcium pantothenate (1.004999) DLEU2
5905	-1.119841	geldanamycin (-1.119841) RP11-259N19.1	false	-1.119841	geldanamycin (-1.119841) RP11-259N19.1
5050	1.09813	piromidic acid (1.09813) RP11-395B7.2.1	false	1.09813	piromidic acid (1.09813) RP11-395B7.2.1
3943	-1.159645	skimmianine (-1.159645) DLEU2	false	-1.159645	skimmianine (-1.159645) DLEU2
2436	-1.479612	probenecid (-1.479612) RP11-286E11.2.1	false	-1.479612	probenecid (-1.479612) RP11-286E11.2.1
5386	1.071014	idoxuridine (1.071014) LINC00094	false	1.071014	idoxuridine (1.071014) LINC00094
2799	-1.102636	biotin (-1.102636) FGD5-AS1	false	-1.102636	biotin (-1.102636) FGD5-AS1
4239	1.046383	metaraminol (1.046383) RP11-1148L6.5.1	false	1.046383	metaraminol (1.046383) RP11-1148L6.5.1
2348	-1.155303	conessine (-1.155303) RP11-148B6.1.1	false	-1.155303	conessine (-1.155303) RP11-148B6.1.1
5813	1.55726	glibenclamide (1.55726) IGF2-AS	false	1.55726	glibenclamide (1.55726) IGF2-AS
4553	-1.196601	mebhydrolin (-1.196601) RP5-1068E13.3.1	false	-1.196601	mebhydrolin (-1.196601) RP5-1068E13.3.1
3244	1.080006	rimexolone (1.080006) RP11-395B7.2.1	false	1.080006	rimexolone (1.080006) RP11-395B7.2.1
2781	-1.212331	doxorubicin (-1.212331) RP11-152N13.16	false	-1.212331	doxorubicin (-1.212331) RP11-152N13.16
4542	-1.357789	mebhydrolin (-1.357789) EGOT	false	-1.357789	mebhydrolin (-1.357789) EGOT
2714	1.108519	(-)-isoprenaline (1.108519) RP11-667K14.3	false	1.108519	(-)-isoprenaline (1.108519) RP11-667K14.3
1810	1.372283	3-hydroxy-DL-kynurenine (1.372283) RP11-1148L6.5.1	false	1.372283	3-hydroxy-DL-kynurenine (1.372283) RP11-1148L6.5.1
4968	-1.263719	propantheline bromide (-1.263719) FAM182A	false	-1.263719	propantheline bromide (-1.263719) FAM182A
2672	-2.4977875	0179445-0000 (-2.4977875) CASP8AP2	false	-2.4977875	0179445-0000 (-2.4977875) CASP8AP2
5832	1.617668	chlorzoxazone (1.617668) RP11-655M14.13.1	false	1.617668	chlorzoxazone (1.617668) RP11-655M14.13.1
1749	1.14359	papaverine (1.14359) RP11-403P17.4.1	false	1.14359	papaverine (1.14359) RP11-403P17.4.1
5895	1.18982	4,5-dianilinophthalimide (1.18982) AC006042.6.1	false	1.18982	4,5-dianilinophthalimide (1.18982) AC006042.6.1
3685	1.445592	amrinone (1.445592) RP11-762H8.1.1	false	1.445592	amrinone (1.445592) RP11-762H8.1.1
3610	1.2699715	harmine (1.2699715) RP11-1148L6.5.1	false	1.2699715	harmine (1.2699715) RP11-1148L6.5.1
5904	1.2308035	resveratrol (1.2308035) AC006042.6.1	false	1.2308035	resveratrol (1.2308035) AC006042.6.1
3716	1.03614	ebselen (1.03614) MIR22HG	false	1.03614	ebselen (1.03614) MIR22HG
2644	-1.030648	etiocholanolone (-1.030648) RP5-1184F4.5.1	false	-1.030648	etiocholanolone (-1.030648) RP5-1184F4.5.1
5229	1.017194	azacyclonol (1.017194) RP11-395B7.2.1	false	1.017194	azacyclonol (1.017194) RP11-395B7.2.1
4259	1.158979	benzamil (1.158979) AC005546.2	false	1.158979	benzamil (1.158979) AC005546.2
2079	-1.513302	letrozole (-1.513302) U66059.58.1	false	-1.513302	letrozole (-1.513302) U66059.58.1
1739	1.041646	spiperone (1.041646) RP11-203B9.4.1	false	1.041646	spiperone (1.041646) RP11-203B9.4.1
1851	-1.109051	octopamine (-1.109051) RP11-1148L6.5.1	false	-1.109051	octopamine (-1.109051) RP11-1148L6.5.1
5652	2.377383	parthenolide (2.377383) MAP3K14	false	2.377383	parthenolide (2.377383) MAP3K14
3846	-1.097988	meclofenoxate (-1.097988) RP4-564F22.2.1	false	-1.097988	meclofenoxate (-1.097988) RP4-564F22.2.1
4608	1.044212	apigenin (1.044212) AC012074.2.1	false	1.044212	apigenin (1.044212) AC012074.2.1
4671	-1.296273	anisomycin (-1.296273) RP11-649A18.7	false	-1.296273	anisomycin (-1.296273) RP11-649A18.7
6000	-1.00935	tretinoin (-1.00935) FAM182A	false	-1.00935	tretinoin (-1.00935) FAM182A
2250	-1.94551	canavanine (-1.94551) RP11-612B6.2.1	false	-1.94551	canavanine (-1.94551) RP11-612B6.2.1
4260	-1.133972	benzamil (-1.133972) RP11-517A5.4	false	-1.133972	benzamil (-1.133972) RP11-517A5.4
5400	-1.249028	idoxuridine (-1.249028) SEMA3B	false	-1.249028	idoxuridine (-1.249028) SEMA3B
5277	1.234669	metronidazole (1.234669) RP11-429B14.4.1	false	1.234669	metronidazole (1.234669) RP11-429B14.4.1
3829	1.004672	levonorgestrel (1.004672) RP11-566E18.3.1	false	1.004672	levonorgestrel (1.004672) RP11-566E18.3.1
5282	1.342305	metronidazole (1.342305) AL928768.3.1	false	1.342305	metronidazole (1.342305) AL928768.3.1
2376	1.662692	spectinomycin (1.662692) RP11-499E18.1.1	false	1.662692	spectinomycin (1.662692) RP11-499E18.1.1
2972	1.145769	latamoxef (1.145769) AC012074.2.1	false	1.145769	latamoxef (1.145769) AC012074.2.1
5995	1.151266	alpha-estradiol (1.151266) RP11-403P17.4.1	false	1.151266	alpha-estradiol (1.151266) RP11-403P17.4.1
5151	1.2733675	fusaric acid (1.2733675) RP11-667K14.3	false	1.2733675	fusaric acid (1.2733675) RP11-667K14.3
4038	-1.159502	cephaeline (-1.159502) AC007319.1.1	false	-1.159502	cephaeline (-1.159502) AC007319.1.1
1800	-1.133966	mimosine (-1.133966) LL22NC03-2H8.5	false	-1.133966	mimosine (-1.133966) LL22NC03-2H8.5
3755	1.083428	isoetarine (1.083428) LINC00339	false	1.083428	isoetarine (1.083428) LINC00339
5289	1.662566	metronidazole (1.662566) MYCNOS	false	1.662566	metronidazole (1.662566) MYCNOS
3001	-1.219438	(+/-)-catechin (-1.219438) RP11-612B6.2.1	false	-1.219438	(+/-)-catechin (-1.219438) RP11-612B6.2.1
3666	-1.241882	azlocillin (-1.241882) RP11-148B6.1.1	false	-1.241882	azlocillin (-1.241882) RP11-148B6.1.1
2375	-2.030811	spectinomycin (-2.030811) RP11-148B6.1.1	false	-2.030811	spectinomycin (-2.030811) RP11-148B6.1.1
2253	-1.261733	canavanine (-1.261733) RP11-286E11.2.1	false	-1.261733	canavanine (-1.261733) RP11-286E11.2.1
3746	1.168994	zomepirac (1.168994) RP11-152N13.16	false	1.168994	zomepirac (1.168994) RP11-152N13.16
2655	1.324697	0179445-0000 (1.324697) RP11-612B6.2.1	false	1.324697	0179445-0000 (1.324697) RP11-612B6.2.1
4013	-1.034418	ergocalciferol (-1.034418) RP11-1148L6.5.1	false	-1.034418	ergocalciferol (-1.034418) RP11-1148L6.5.1
2875	1.3848195	chrysin (1.3848195) RP11-49C24.1.1	false	1.3848195	chrysin (1.3848195) RP11-49C24.1.1
1287	1.032941	BCB000038 (1.032941) RP11-667K14.3	false	1.032941	BCB000038 (1.032941) RP11-667K14.3
4308	1.052452	helveticoside (1.052452) CTA-204B4.6.1	false	1.052452	helveticoside (1.052452) CTA-204B4.6.1
4180	-1.129286	nefopam (-1.129286) FAM182A	false	-1.129286	nefopam (-1.129286) FAM182A
4941	1.556349	18-aminocephalosporanic acid (1.556349) CTD-2562J17.7.1	false	1.556349	18-aminocephalosporanic acid (1.556349) CTD-2562J17.7.1
2596	1.234606	spiramycin (1.234606) LINC00342	false	1.234606	spiramycin (1.234606) LINC00342
5057	-1.360239	decamethonium bromide (-1.360239) LL22NC03-2H8.5	false	-1.360239	decamethonium bromide (-1.360239) LL22NC03-2H8.5
4171	1.30416	lisinopril (1.30416) RP11-667K14.3	false	1.30416	lisinopril (1.30416) RP11-667K14.3
3966	-1.284125	nifuroxazide (-1.284125) RP11-403C10.2.1	false	-1.284125	nifuroxazide (-1.284125) RP11-403C10.2.1
3911	-1.0520925	trioxysalen (-1.0520925) LL22NC03-2H8.5	false	-1.0520925	trioxysalen (-1.0520925) LL22NC03-2H8.5
5296	1.849967	metronidazole (1.849967) IGF2-AS	false	1.849967	metronidazole (1.849967) IGF2-AS
4753	1.724006	thioguanosine (1.724006) RP11-667K14.3	false	1.724006	thioguanosine (1.724006) RP11-667K14.3
4569	-1.200921	pepstatin (-1.200921) RP1-302G2.5	false	-1.200921	pepstatin (-1.200921) RP1-302G2.5
2614	-1.360845	0175029-0000 (-1.360845) RP11-203B9.4.1	false	-1.360845	0175029-0000 (-1.360845) RP11-203B9.4.1
1280	-1.16537	BCB000039 (-1.16537) AC009299.3.1	false	-1.16537	BCB000039 (-1.16537) AC009299.3.1
5331	1.057196	diflunisal (1.057196) MIR22HG	false	1.057196	diflunisal (1.057196) MIR22HG
4321	1.641331	halcinonide (1.641331) RP11-1148L6.5.1	false	1.641331	halcinonide (1.641331) RP11-1148L6.5.1
1453	1.519245	alsterpaullone (1.519245) RP11-395B7.2.1	false	1.519245	alsterpaullone (1.519245) RP11-395B7.2.1
1985	-1.148383	cyclobenzaprine (-1.148383) C9orf31	false	-1.148383	cyclobenzaprine (-1.148383) C9orf31
4904	-1.228928	15-delta prostaglandin J2 (-1.228928) MCM3AP-AS1	false	-1.228928	15-delta prostaglandin J2 (-1.228928) MCM3AP-AS1
5941	-1.37145	tanespimycin (-1.37145) RP11-612B6.2.1	false	-1.37145	tanespimycin (-1.37145) RP11-612B6.2.1
5591	-1.409641	ellipticine (-1.409641) LINC00338	false	-1.409641	ellipticine (-1.409641) LINC00338
3350	-2.436396	proscillaridin (-2.436396) AD000090.2.1	false	-2.436396	proscillaridin (-2.436396) AD000090.2.1
4562	1.5373415	ciclosporin (1.5373415) PLK1S1	false	1.5373415	ciclosporin (1.5373415) PLK1S1
4003	1.179022	ceforanide (1.179022) RP11-1148L6.5.1	false	1.179022	ceforanide (1.179022) RP11-1148L6.5.1
2707	-1.00693	kaempferol (-1.00693) RP11-612B6.2.1	false	-1.00693	kaempferol (-1.00693) RP11-612B6.2.1
2556	-1.134203	tolbutamide (-1.134203) RP11-395B7.2.1	false	-1.134203	tolbutamide (-1.134203) RP11-395B7.2.1
4475	-1.305056	8-azaguanine (-1.305056) RP11-1148L6.5.1	false	-1.305056	8-azaguanine (-1.305056) RP11-1148L6.5.1
5409	-1.002015	amprolium (-1.002015) SNHG3	false	-1.002015	amprolium (-1.002015) SNHG3
4846	1.151030333	vorinostat (1.151030333) LL22NC03-2H8.5	false	1.151030333	vorinostat (1.151030333) LL22NC03-2H8.5
2772	1.157132	pilocarpine (1.157132) RP11-1148L6.5.1	false	1.157132	pilocarpine (1.157132) RP11-1148L6.5.1
3501	-1.579137	benperidol (-1.579137) DGCR5	false	-1.579137	benperidol (-1.579137) DGCR5
3530	1.098959	norcyclobenzaprine (1.098959) MIR22HG	false	1.098959	norcyclobenzaprine (1.098959) MIR22HG
2995	-1.114791	paromomycin (-1.114791) RP11-612B6.2.1	false	-1.114791	paromomycin (-1.114791) RP11-612B6.2.1
1823	-1.108193	deptropine (-1.108193) DLEU2	false	-1.108193	deptropine (-1.108193) DLEU2
2944	-1.061611	luteolin (-1.061611) MCM3AP-AS1	false	-1.061611	luteolin (-1.061611) MCM3AP-AS1
1711	1.153625	trifluridine (1.153625) RP11-474N8.5.1	false	1.153625	trifluridine (1.153625) RP11-474N8.5.1
3836	-1.011617	meclofenoxate (-1.011617) SEC22B	false	-1.011617	meclofenoxate (-1.011617) SEC22B
4207	2.286395	camptothecin (2.286395) SNHG3	false	2.286395	camptothecin (2.286395) SNHG3
5804	1.455761	glibenclamide (1.455761) RP11-655M14.13.1	false	1.455761	glibenclamide (1.455761) RP11-655M14.13.1
2586	-1.109691	diethylstilbestrol (-1.109691) LL22NC03-2H8.5	false	-1.109691	diethylstilbestrol (-1.109691) LL22NC03-2H8.5
1467	-1.233619	mecamylamine (-1.233619) RP11-1148L6.5.1	false	-1.233619	mecamylamine (-1.233619) RP11-1148L6.5.1
5661	-1.548792667	trichostatin A (-1.548792667) FGD5-AS1	false	-1.548792667	trichostatin A (-1.548792667) FGD5-AS1
4533	-1.071671	mebhydrolin (-1.071671) RP11-655M14.13.1	false	-1.071671	mebhydrolin (-1.071671) RP11-655M14.13.1
3170	1.431085	fosfosal (1.431085) AD000090.2.1	false	1.431085	fosfosal (1.431085) AD000090.2.1
2634	-1.453207	sulfamethoxazole (-1.453207) RP11-203B9.4.1	false	-1.453207	sulfamethoxazole (-1.453207) RP11-203B9.4.1
2920	-1.628106333	digoxigenin (-1.628106333) LINC00094	false	-1.628106333	digoxigenin (-1.628106333) LINC00094
1444	-3.119753333	alsterpaullone (-3.119753333) C14orf169	false	-3.119753333	alsterpaullone (-3.119753333) C14orf169
1566	-1.086488	proxyphylline (-1.086488) RP11-1148L6.5.1	false	-1.086488	proxyphylline (-1.086488) RP11-1148L6.5.1
5080	-1.152737	dequalinium chloride (-1.152737) DLEU2	false	-1.152737	dequalinium chloride (-1.152737) DLEU2
3230	1.00504	quinpirole (1.00504) MIR22HG	false	1.00504	quinpirole (1.00504) MIR22HG
4807	1.677443	fulvestrant (1.677443) LL22NC03-2H8.5	false	1.677443	fulvestrant (1.677443) LL22NC03-2H8.5
3482	1.261019	terconazole (1.261019) FAM182A	false	1.261019	terconazole (1.261019) FAM182A
5810	1.32596	glibenclamide (1.32596) AC006042.6.1	false	1.32596	glibenclamide (1.32596) AC006042.6.1
2790	-1.5922465	doxorubicin (-1.5922465) C12orf47	false	-1.5922465	doxorubicin (-1.5922465) C12orf47
5311	1.181877	diphemanil metilsulfate (1.181877) DLEU2	false	1.181877	diphemanil metilsulfate (1.181877) DLEU2
5481	-1.092791	doxylamine (-1.092791) LINC00483	false	-1.092791	doxylamine (-1.092791) LINC00483
2770	-1.09584	azacitidine (-1.09584) PLK1S1	false	-1.09584	azacitidine (-1.09584) PLK1S1
4534	2.010685	mebhydrolin (2.010685) CTD-2562J17.7.1	false	2.010685	mebhydrolin (2.010685) CTD-2562J17.7.1
4892	-1.509175	22-delta prostaglandin J2 (-1.509175) RP11-259N19.1	false	-1.509175	22-delta prostaglandin J2 (-1.509175) RP11-259N19.1
2394	3.014006	galantamine (3.014006) LL22NC03-2H8.5	false	3.014006	galantamine (3.014006) LL22NC03-2H8.5
3957	1.0028	nifuroxazide (1.0028) U47924.30	false	1.0028	nifuroxazide (1.0028) U47924.30
5799	-1.315709	glibenclamide (-1.315709) RP11-394A14.4	false	-1.315709	glibenclamide (-1.315709) RP11-394A14.4
5114	1.127108	lanatoside C (1.127108) CTA-204B4.6.1	false	1.127108	lanatoside C (1.127108) CTA-204B4.6.1
1577	-2.023812	oxybenzone (-2.023812) RP11-1148L6.5.1	false	-2.023812	oxybenzone (-2.023812) RP11-1148L6.5.1
2092	1.009606	seneciphylline (1.009606) RP11-403P17.4.1	false	1.009606	seneciphylline (1.009606) RP11-403P17.4.1
3448	1.030996	colistin (1.030996) LINC00094	false	1.030996	colistin (1.030996) LINC00094
3727	-1.27047	pridinol (-1.27047) RP11-612B6.2.1	false	-1.27047	pridinol (-1.27047) RP11-612B6.2.1
2941	-1.055608	luteolin (-1.055608) DLEU2	false	-1.055608	luteolin (-1.055608) DLEU2
4922	-2.385006	methanthelinium bromide (-2.385006) RP11-1148L6.5.1	false	-2.385006	methanthelinium bromide (-2.385006) RP11-1148L6.5.1
5582	-1.279313	ipratropium bromide (-1.279313) LINC00342	false	-1.279313	ipratropium bromide (-1.279313) LINC00342
3202	-1.378783	theophylline (-1.378783) RP11-148B6.1.1	false	-1.378783	theophylline (-1.378783) RP11-148B6.1.1
3028	1.666938	mestranol (1.666938) RP11-499E18.1.1	false	1.666938	mestranol (1.666938) RP11-499E18.1.1
3460	1.134609	colistin (1.134609) RP11-148G20.1.1	false	1.134609	colistin (1.134609) RP11-148G20.1.1
4476	1.6700135	8-azaguanine (1.6700135) MIR22HG	false	1.6700135	8-azaguanine (1.6700135) MIR22HG
4555	-1.515948	mebhydrolin (-1.515948) FAM182A	false	-1.515948	mebhydrolin (-1.515948) FAM182A
3952	1.618743	quercetin (1.618743) KB-1460A1.5.1	false	1.618743	quercetin (1.618743) KB-1460A1.5.1
5616	1.66249	ajmaline (1.66249) RP4-802A10.1	false	1.66249	ajmaline (1.66249) RP4-802A10.1
5203	1.212095	midecamycin (1.212095) LINC00965	false	1.212095	midecamycin (1.212095) LINC00965
3657	1.028754	securinine (1.028754) LINC00339	false	1.028754	securinine (1.028754) LINC00339
1330	1.032395	semustine (1.032395) AC004840.9.1	false	1.032395	semustine (1.032395) AC004840.9.1
2619	-1.1689185	0175029-0000 (-1.1689185) LINC00339	false	-1.1689185	0175029-0000 (-1.1689185) LINC00339
5596	-1.081779	ellipticine (-1.081779) PLK1S1	false	-1.081779	ellipticine (-1.081779) PLK1S1
2361	1.189956	meptazinol (1.189956) CTD-2562J17.7.1	false	1.189956	meptazinol (1.189956) CTD-2562J17.7.1
4746	1.284	clomifene (1.284) RP11-395B7.2.1	false	1.284	clomifene (1.284) RP11-395B7.2.1
2347	1.308898	conessine (1.308898) CTD-2562J17.7.1	false	1.308898	conessine (1.308898) CTD-2562J17.7.1
1954	1.29482	piperacillin (1.29482) ZNRD1-AS1	false	1.29482	piperacillin (1.29482) ZNRD1-AS1
5032	-1.205806	methylbenzethonium chloride (-1.205806) AC005546.2	false	-1.205806	methylbenzethonium chloride (-1.205806) AC005546.2
4958	-1.111612	gibberellic acid (-1.111612) U66059.58.1	false	-1.111612	gibberellic acid (-1.111612) U66059.58.1
5352	-1.042457	oxetacaine (-1.042457) U66059.58.1	false	-1.042457	oxetacaine (-1.042457) U66059.58.1
1795	-1.079991	betamethasone (-1.079991) RP11-612B6.2.1	false	-1.079991	betamethasone (-1.079991) RP11-612B6.2.1
4885	1.040406	29-delta prostaglandin J2 (1.040406) RP4-564F22.2.1	false	1.040406	29-delta prostaglandin J2 (1.040406) RP4-564F22.2.1
1718	1.101328	sulfamethizole (1.101328) AC012065.7.1	false	1.101328	sulfamethizole (1.101328) AC012065.7.1
2696	-1.535514	flumetasone (-1.535514) RP11-517A5.4	false	-1.535514	flumetasone (-1.535514) RP11-517A5.4
2046	-1.096809	piperine (-1.096809) CYP4F8	false	-1.096809	piperine (-1.096809) CYP4F8
4549	-1.048342	mebhydrolin (-1.048342) MEG3	false	-1.048342	mebhydrolin (-1.048342) MEG3
1965	1.090152	tocainide (1.090152) RP11-499E18.1.1	false	1.090152	tocainide (1.090152) RP11-499E18.1.1
5958	-1.003481	tanespimycin (-1.003481) C14orf169	false	-1.003481	tanespimycin (-1.003481) C14orf169
5841	1.506266	chlorzoxazone (1.506266) LINC00302	false	1.506266	chlorzoxazone (1.506266) LINC00302
1500	1.250398	SB-202190 (1.250398) RP11-395B7.7.1	false	1.250398	SB-202190 (1.250398) RP11-395B7.7.1
2338	-1.229068	roxithromycin (-1.229068) RP1-302G2.5	false	-1.229068	roxithromycin (-1.229068) RP1-302G2.5
1972	-1.019893	dydrogesterone (-1.019893) RP11-612B6.2.1	false	-1.019893	dydrogesterone (-1.019893) RP11-612B6.2.1
1594	1.255093	STOCK1N-35215 (1.255093) RP11-403P17.4.1	false	1.255093	STOCK1N-35215 (1.255093) RP11-403P17.4.1
1549	1.086807	STOCK1N-35874 (1.086807) MAP3K14	false	1.086807	STOCK1N-35874 (1.086807) MAP3K14
1868	-1.2429585	daunorubicin (-1.2429585) UBXN8	false	-1.2429585	daunorubicin (-1.2429585) UBXN8
3209	-1.164461	theophylline (-1.164461) C9orf31	false	-1.164461	theophylline (-1.164461) C9orf31
4949	1.674475	10-aminocephalosporanic acid (1.674475) FGD5-AS1	false	1.674475	10-aminocephalosporanic acid (1.674475) FGD5-AS1
2121	1.272299	salsolinol (1.272299) CTD-2562J17.7.1	false	1.272299	salsolinol (1.272299) CTD-2562J17.7.1
2447	1.118704	probenecid (1.118704) LINC00094	false	1.118704	probenecid (1.118704) LINC00094
5561	-1.296071	physostigmine (-1.296071) RP11-394A14.4	false	-1.296071	physostigmine (-1.296071) RP11-394A14.4
2931	-1.330713	luteolin (-1.330713) RP11-152N13.16	false	-1.330713	luteolin (-1.330713) RP11-152N13.16
4172	-1.07842	ethisterone (-1.07842) RP11-1148L6.5.1	false	-1.07842	ethisterone (-1.07842) RP11-1148L6.5.1
1294	2.1167735	irinotecan (2.1167735) RP11-255C15.3.1	false	2.1167735	irinotecan (2.1167735) RP11-255C15.3.1
3921	-1.291206	etanidazole (-1.291206) LL22NC03-2H8.5	false	-1.291206	etanidazole (-1.291206) LL22NC03-2H8.5
2857	1.201533	vinpocetine (1.201533) LL22NC03-2H8.5	false	1.201533	vinpocetine (1.201533) LL22NC03-2H8.5
5658	-1.079623	trichostatin A (-1.079623) ZNF518A	false	-1.079623	trichostatin A (-1.079623) ZNF518A
3780	-1.027447	vidarabine (-1.027447) LL22NC03-2H8.5	false	-1.027447	vidarabine (-1.027447) LL22NC03-2H8.5
1904	1.050603	phenoxybenzamine (1.050603) RP11-1148L6.5.1	false	1.050603	phenoxybenzamine (1.050603) RP11-1148L6.5.1
5467	1.619528	doxylamine (1.619528) U47924.30	false	1.619528	doxylamine (1.619528) U47924.30
5374	-1.386366	idoxuridine (-1.386366) RP11-286E11.2.1	false	-1.386366	idoxuridine (-1.386366) RP11-286E11.2.1
2818	-1.2168425	mitoxantrone (-1.2168425) LL22NC03-2H8.5	false	-1.2168425	mitoxantrone (-1.2168425) LL22NC03-2H8.5
6009	1.150786	wortmannin (1.150786) RP11-403P17.4.1	false	1.150786	wortmannin (1.150786) RP11-403P17.4.1
2103	1.511144	seneciphylline (1.511144) RP11-499E18.1.1	false	1.511144	seneciphylline (1.511144) RP11-499E18.1.1
1627	-1.199015	pheneticillin (-1.199015) LL22NC03-2H8.5	false	-1.199015	pheneticillin (-1.199015) LL22NC03-2H8.5
2454	1.346216	probenecid (1.346216) LINC00339	false	1.346216	probenecid (1.346216) LINC00339
4446	1.026521	sulfadiazine (1.026521) RP11-84C10.2.1	false	1.026521	sulfadiazine (1.026521) RP11-84C10.2.1
2303	1.142852	lumicolchicine (1.142852) RP11-395B7.2.1	false	1.142852	lumicolchicine (1.142852) RP11-395B7.2.1
2224	-1.082261	atovaquone (-1.082261) SNHG3	false	-1.082261	atovaquone (-1.082261) SNHG3
2217	-1.433875	atovaquone (-1.433875) RP1-302G2.5	false	-1.433875	atovaquone (-1.433875) RP1-302G2.5
1481	-1.33013	scriptaid (-1.33013) CTC-428G20.3.1	false	-1.33013	scriptaid (-1.33013) CTC-428G20.3.1
5768	1.172425	clopamide (1.172425) RP11-148G20.1.1	false	1.172425	clopamide (1.172425) RP11-148G20.1.1
5208	1.037513	midecamycin (1.037513) LINC00094	false	1.037513	midecamycin (1.037513) LINC00094
3984	-1.267349	thiostrepton (-1.267349) WT1-AS	false	-1.267349	thiostrepton (-1.267349) WT1-AS
1759	-1.057499	budesonide (-1.057499) RP11-1148L6.5.1	false	-1.057499	budesonide (-1.057499) RP11-1148L6.5.1
1877	1.38308	meclocycline (1.38308) AC012065.7.1	false	1.38308	meclocycline (1.38308) AC012065.7.1
2281	-1.140996	lumicolchicine (-1.140996) RP11-72I8.1.1	false	-1.140996	lumicolchicine (-1.140996) RP11-72I8.1.1
2986	-1.074385	paracetamol (-1.074385) RP11-394A14.4	false	-1.074385	paracetamol (-1.074385) RP11-394A14.4
3539	-1.03593	omeprazole (-1.03593) RP11-1148L6.5.1	false	-1.03593	omeprazole (-1.03593) RP11-1148L6.5.1
2763	-1.147219	azacitidine (-1.147219) CASP8AP2	false	-1.147219	azacitidine (-1.147219) CASP8AP2
1387	1.196794	MG-262 (1.196794) RP11-72I8.1.1	false	1.196794	MG-262 (1.196794) RP11-72I8.1.1
1831	-1.13364	levopropoxyphene (-1.13364) RP11-1148L6.5.1	false	-1.13364	levopropoxyphene (-1.13364) RP11-1148L6.5.1
1486	1.269863	0297417-0002B (1.269863) RP11-49C24.1.1	false	1.269863	0297417-0002B (1.269863) RP11-49C24.1.1
4273	-1.69413	lycorine (-1.69413) RP11-617F23.1.1	false	-1.69413	lycorine (-1.69413) RP11-617F23.1.1
3949	1.231984	quercetin (1.231984) RP11-474N8.5.1	false	1.231984	quercetin (1.231984) RP11-474N8.5.1
5206	1.150636	midecamycin (1.150636) BX004987.5.1	false	1.150636	midecamycin (1.150636) BX004987.5.1
2821	-1.754116	mitoxantrone (-1.754116) CROCCP2	false	-1.754116	mitoxantrone (-1.754116) CROCCP2
2494	1.100347	sitosterol (1.100347) RP11-403P17.4.1	false	1.100347	sitosterol (1.100347) RP11-403P17.4.1
2457	-1.020459	probenecid (-1.020459) PDXDC2P	false	-1.020459	probenecid (-1.020459) PDXDC2P
1289	-1.103958	CP-863187 (-1.103958) KIR3DP1	false	-1.103958	CP-863187 (-1.103958) KIR3DP1
4320	1.724445	acacetin (1.724445) RP11-49C24.1.1	false	1.724445	acacetin (1.724445) RP11-49C24.1.1
5624	1.114425	ajmaline (1.114425) AC009299.3.1	false	1.114425	ajmaline (1.114425) AC009299.3.1
4420	2.369707	diprophylline (2.369707) RP11-394A14.4	false	2.369707	diprophylline (2.369707) RP11-394A14.4
5989	1.1015445	valproic acid (1.1015445) RP11-403P17.4.1	false	1.1015445	valproic acid (1.1015445) RP11-403P17.4.1
5068	-1.013214	isopropamide iodide (-1.013214) RP11-566E18.3.1	false	-1.013214	isopropamide iodide (-1.013214) RP11-566E18.3.1
2717	1.04544	ciprofibrate (1.04544) AC006042.6.1	false	1.04544	ciprofibrate (1.04544) AC006042.6.1
2990	-1.037083	doxazosin (-1.037083) PDXDC2P	false	-1.037083	doxazosin (-1.037083) PDXDC2P
2827	1.390409	hycanthone (1.390409) RP11-203B9.4.1	false	1.390409	hycanthone (1.390409) RP11-203B9.4.1
5541	-1.043231	sulfathiazole (-1.043231) ABO	false	-1.043231	sulfathiazole (-1.043231) ABO
4181	-1.1673	metoclopramide (-1.1673) LL22NC03-2H8.5	false	-1.1673	metoclopramide (-1.1673) LL22NC03-2H8.5
2724	1.011445	netilmicin (1.011445) AC012065.7.1	false	1.011445	netilmicin (1.011445) AC012065.7.1
2750	-1.013436	(+)-isoprenaline (-1.013436) RP11-403C10.2.1	false	-1.013436	(+)-isoprenaline (-1.013436) RP11-403C10.2.1
5694	-1.199955	trichostatin A (-1.199955) RP11-44F21.3.1	false	-1.199955	trichostatin A (-1.199955) RP11-44F21.3.1
1344	-1.299453	metrifonate (-1.299453) RP11-1148L6.5.1	false	-1.299453	metrifonate (-1.299453) RP11-1148L6.5.1
1886	-1.021015	Prestwick-685 (-1.021015) LL22NC03-2H8.5	false	-1.021015	Prestwick-685 (-1.021015) LL22NC03-2H8.5
2837	1.168004	zidovudine (1.168004) RP11-395B7.2.1	false	1.168004	zidovudine (1.168004) RP11-395B7.2.1
2028	1.024821	piperine (1.024821) RP11-395B7.7.1	false	1.024821	piperine (1.024821) RP11-395B7.7.1
1495	1.489201	AH-23848 (1.489201) RP11-203B9.4.1	false	1.489201	AH-23848 (1.489201) RP11-203B9.4.1
6018	-1.160941	estradiol (-1.160941) LL22NC03-2H8.5	false	-1.160941	estradiol (-1.160941) LL22NC03-2H8.5
3974	-1.210388	thiostrepton (-1.210388) RP11-49C24.1.1	false	-1.210388	thiostrepton (-1.210388) RP11-49C24.1.1
5237	-1.048999	metanephrine (-1.048999) AC004840.9.1	false	-1.048999	metanephrine (-1.048999) AC004840.9.1
4370	-1.055426	emetine (-1.055426) CYP4F8	false	-1.055426	emetine (-1.055426) CYP4F8
5975	1.577895	thioridazine (1.577895) RP11-72I8.1.1	false	1.577895	thioridazine (1.577895) RP11-72I8.1.1
2404	-2.156632	galantamine (-2.156632) RP11-148B6.1.1	false	-2.156632	galantamine (-2.156632) RP11-148B6.1.1
1373	1.338842	MS-275 (1.338842) LINC00312	false	1.338842	MS-275 (1.338842) LINC00312
5722	-1.104699294	trichostatin A (-1.104699294) AD000090.2.1	false	-1.104699294	trichostatin A (-1.104699294) AD000090.2.1
3180	1.211076	theobromine (1.211076) RP11-1148L6.5.1	false	1.211076	theobromine (1.211076) RP11-1148L6.5.1
2508	1.053143	canadine (1.053143) RP11-612B6.2.1	false	1.053143	canadine (1.053143) RP11-612B6.2.1
1509	1.050685	alprenolol (1.050685) RP4-669P10.16.1	false	1.050685	alprenolol (1.050685) RP4-669P10.16.1
5753	2.10001	dirithromycin (2.10001) RP11-517A5.4	false	2.10001	dirithromycin (2.10001) RP11-517A5.4
1372	2.1367845	MS-275 (2.1367845) RP11-499E18.1.1	false	2.1367845	MS-275 (2.1367845) RP11-499E18.1.1
2372	-1.277091	spectinomycin (-1.277091) RP11-655M14.13.1	false	-1.277091	spectinomycin (-1.277091) RP11-655M14.13.1
1640	-1.235001	butirosin (-1.235001) LL22NC03-2H8.5	false	-1.235001	butirosin (-1.235001) LL22NC03-2H8.5
3435	1.325827	colistin (1.325827) LINC00667	false	1.325827	colistin (1.325827) LINC00667
5554	-1.128902	epivincamine (-1.128902) CASP8AP2	false	-1.128902	epivincamine (-1.128902) CASP8AP2
4384	-2.236690333	emetine (-2.236690333) SNHG3	false	-2.236690333	emetine (-2.236690333) SNHG3
2933	-1.727979	luteolin (-1.727979) LL22NC03-2H8.5	false	-1.727979	luteolin (-1.727979) LL22NC03-2H8.5
4363	-1.253872	emetine (-1.253872) C9orf31	false	-1.253872	emetine (-1.253872) C9orf31
4789	1.005639	alvespimycin (1.005639) RP11-1148L6.5.1	false	1.005639	alvespimycin (1.005639) RP11-1148L6.5.1
5338	-1.543322	captopril (-1.543322) MCM3AP-AS1	false	-1.543322	captopril (-1.543322) MCM3AP-AS1
4055	-1.254851	cephaeline (-1.254851) LINC00094	false	-1.254851	cephaeline (-1.254851) LINC00094
1587	-1.662354	meglumine (-1.662354) RP11-1148L6.5.1	false	-1.662354	meglumine (-1.662354) RP11-1148L6.5.1
5966	-1.6313265	chlorpromazine (-1.6313265) RP11-1148L6.5.1	false	-1.6313265	chlorpromazine (-1.6313265) RP11-1148L6.5.1
3273	-1.034504	zuclopenthixol (-1.034504) RP11-152N13.16	false	-1.034504	zuclopenthixol (-1.034504) RP11-152N13.16
3094	-1.06184	reserpine (-1.06184) RP11-74N20.1.1	false	-1.06184	reserpine (-1.06184) RP11-74N20.1.1
4406	-1.262856	neomycin (-1.262856) RP11-1148L6.5.1	false	-1.262856	neomycin (-1.262856) RP11-1148L6.5.1
2489	-1.081346	tetroquinone (-1.081346) RP11-612B6.2.1	false	-1.081346	tetroquinone (-1.081346) RP11-612B6.2.1
5428	1.645295	miconazole (1.645295) DLEU2	false	1.645295	miconazole (1.645295) DLEU2
4988	1.181401	trimethylcolchicinic acid (1.181401) DLEU2	false	1.181401	trimethylcolchicinic acid (1.181401) DLEU2
3679	1.116766	carbinoxamine (1.116766) RP11-395B7.2.1	false	1.116766	carbinoxamine (1.116766) RP11-395B7.2.1
2643	-1.102852	diphenylpyraline (-1.102852) RP11-517A5.4	false	-1.102852	diphenylpyraline (-1.102852) RP11-517A5.4
1791	1.372367	rolipram (1.372367) RP11-667K14.3	false	1.372367	rolipram (1.372367) RP11-667K14.3
2652	-1.205042	0179445-0000 (-1.205042) FAM182A	false	-1.205042	0179445-0000 (-1.205042) FAM182A
3151	-1.290913	trichlormethiazide (-1.290913) PDXDC2P	false	-1.290913	trichlormethiazide (-1.290913) PDXDC2P
5597	1.4374065	ellipticine (1.4374065) RP11-203B9.4.1	false	1.4374065	ellipticine (1.4374065) RP11-203B9.4.1
2149	1.011399	zalcitabine (1.011399) RP11-119F7.5.1	false	1.011399	zalcitabine (1.011399) RP11-119F7.5.1
4728	-1.193458	ouabain (-1.193458) LINC00339	false	-1.193458	ouabain (-1.193458) LINC00339
2735	1.502884	flecainide (1.502884) LL22NC03-2H8.5	false	1.502884	flecainide (1.502884) LL22NC03-2H8.5
5318	-1.380858	diflunisal (-1.380858) RP11-612B6.2.1	false	-1.380858	diflunisal (-1.380858) RP11-612B6.2.1
5106	1.320147667	lanatoside C (1.320147667) MIR22HG	false	1.320147667	lanatoside C (1.320147667) MIR22HG
1472	-1.122798	scriptaid (-1.122798) TUG1	false	-1.122798	scriptaid (-1.122798) TUG1
5583	-1.167981	ipratropium bromide (-1.167981) DLEU2	false	-1.167981	ipratropium bromide (-1.167981) DLEU2
5261	-1.105848	chlorhexidine (-1.105848) CASP8AP2	false	-1.105848	chlorhexidine (-1.105848) CASP8AP2
3473	-1.153341	orciprenaline (-1.153341) RP3-522P13.3.1	false	-1.153341	orciprenaline (-1.153341) RP3-522P13.3.1
3892	-1.186319667	strophanthidin (-1.186319667) LINC00339	false	-1.186319667	strophanthidin (-1.186319667) LINC00339
5510	1.38356	cimetidine (1.38356) AC007319.1.1	false	1.38356	cimetidine (1.38356) AC007319.1.1
2563	-1.471982	rifabutin (-1.471982) RP4-564F22.2.1	false	-1.471982	rifabutin (-1.471982) RP4-564F22.2.1
5430	-1.109883	ticlopidine (-1.109883) AC007319.1.1	false	-1.109883	ticlopidine (-1.109883) AC007319.1.1
5854	3.185241	ampyrone (3.185241) RP11-517A5.4	false	3.185241	ampyrone (3.185241) RP11-517A5.4
2181	2.494433	isoxsuprine (2.494433) LL22NC03-2H8.5	false	2.494433	isoxsuprine (2.494433) LL22NC03-2H8.5
3642	-1.100192	gabapentin (-1.100192) RP11-286E11.2.1	false	-1.100192	gabapentin (-1.100192) RP11-286E11.2.1
4094	-1.135607	bumetanide (-1.135607) RP11-394A14.4	false	-1.135607	bumetanide (-1.135607) RP11-394A14.4
2670	1.820823	0179445-0000 (1.820823) MIR22HG	false	1.820823	0179445-0000 (1.820823) MIR22HG
1649	1.325655	AG-013608 (1.325655) RP4-724E16.2.1	false	1.325655	AG-013608 (1.325655) RP4-724E16.2.1
3817	-1.017217	flunixin (-1.017217) RP11-649A18.7	false	-1.017217	flunixin (-1.017217) RP11-649A18.7
3385	-1.442669	molindone (-1.442669) U66059.58.1	false	-1.442669	molindone (-1.442669) U66059.58.1
1784	1.229181	metergoline (1.229181) CTD-2562J17.7.1	false	1.229181	metergoline (1.229181) CTD-2562J17.7.1
3259	1.05884	ozagrel (1.05884) SNHG3	false	1.05884	ozagrel (1.05884) SNHG3
3142	-1.32826	trichlormethiazide (-1.32826) EGOT	false	-1.32826	trichlormethiazide (-1.32826) EGOT
5487	-1.305377	amiloride (-1.305377) RP11-1148L6.5.1	false	-1.305377	amiloride (-1.305377) RP11-1148L6.5.1
3580	1.237573	hydroxyachillin (1.237573) AD000090.2.1	false	1.237573	hydroxyachillin (1.237573) AD000090.2.1
3179	-1.235989	fosfosal (-1.235989) RP3-522P13.3.1	false	-1.235989	fosfosal (-1.235989) RP3-522P13.3.1
5239	-1.264496	apomorphine (-1.264496) RP11-1148L6.5.1	false	-1.264496	apomorphine (-1.264496) RP11-1148L6.5.1
5816	-1.255504	aztreonam (-1.255504) DLEU2	false	-1.255504	aztreonam (-1.255504) DLEU2
3009	-1.048644	(+/-)-catechin (-1.048644) RP5-1068E13.3.1	false	-1.048644	(+/-)-catechin (-1.048644) RP5-1068E13.3.1
4301	1.280199333	helveticoside (1.280199333) MIR22HG	false	1.280199333	helveticoside (1.280199333) MIR22HG
2183	-1.587065	isoxsuprine (-1.587065) RP1-302G2.5	false	-1.587065	isoxsuprine (-1.587065) RP1-302G2.5
3509	1.515643	benperidol (1.515643) RP11-395B7.2.1	false	1.515643	benperidol (1.515643) RP11-395B7.2.1
3864	-1.485874	metoprolol (-1.485874) RP11-1148L6.5.1	false	-1.485874	metoprolol (-1.485874) RP11-1148L6.5.1
1401	1.113836	GW-8510 (1.113836) RP11-49C24.1.1	false	1.113836	GW-8510 (1.113836) RP11-49C24.1.1
5492	-1.184139	sulpiride (-1.184139) RP11-148G20.1.1	false	-1.184139	sulpiride (-1.184139) RP11-148G20.1.1
5702	-1.215264071	trichostatin A (-1.215264071) U47924.30	false	-1.215264071	trichostatin A (-1.215264071) U47924.30
4987	-1.251428	trimethylcolchicinic acid (-1.251428) RP11-74N20.1.1	false	-1.251428	trimethylcolchicinic acid (-1.251428) RP11-74N20.1.1
1654	-1.028569	H-7 (-1.028569) JRK	false	-1.028569	H-7 (-1.028569) JRK
5401	1.510267	idoxuridine (1.510267) DLEU2	false	1.510267	idoxuridine (1.510267) DLEU2
1422	-1.341788	thapsigargin (-1.341788) RP11-574K11.5.1	false	-1.341788	thapsigargin (-1.341788) RP11-574K11.5.1
2905	-1.717115	(-)-atenolol (-1.717115) LL22NC03-2H8.5	false	-1.717115	(-)-atenolol (-1.717115) LL22NC03-2H8.5
1992	1.639683	phenazone (1.639683) LINC00667	false	1.639683	phenazone (1.639683) LINC00667
2330	1.51041	naftopidil (1.51041) FGD5-AS1	false	1.51041	naftopidil (1.51041) FGD5-AS1
2983	1.188449	latamoxef (1.188449) TTTY14	false	1.188449	latamoxef (1.188449) TTTY14
4315	-2.039195	helveticoside (-2.039195) WT1-AS	false	-2.039195	helveticoside (-2.039195) WT1-AS
1528	-1.348013	hydrocortisone (-1.348013) FGD5-AS1	false	-1.348013	hydrocortisone (-1.348013) FGD5-AS1
1767	-1.685178	butoconazole (-1.685178) RP11-1148L6.5.1	false	-1.685178	butoconazole (-1.685178) RP11-1148L6.5.1
1635	-1.094712	nadide (-1.094712) LL22NC03-2H8.5	false	-1.094712	nadide (-1.094712) LL22NC03-2H8.5
2238	-1.191999	atovaquone (-1.191999) PDXDC2P	false	-1.191999	atovaquone (-1.191999) PDXDC2P
4524	-1.192842	digitoxigenin (-1.192842) RP4-564F22.2.1	false	-1.192842	digitoxigenin (-1.192842) RP4-564F22.2.1
4413	-1.281316	isoflupredone (-1.281316) RP11-395B7.2.1	false	-1.281316	isoflupredone (-1.281316) RP11-395B7.2.1
2351	-1.001241	conessine (-1.001241) RP11-170N11.1.1	false	-1.001241	conessine (-1.001241) RP11-170N11.1.1
4717	1.360248	ouabain (1.360248) MIR22HG	false	1.360248	ouabain (1.360248) MIR22HG
1926	-1.128966	sertaconazole (-1.128966) RP11-1148L6.5.1	false	-1.128966	sertaconazole (-1.128966) RP11-1148L6.5.1
3216	-1.085946	theophylline (-1.085946) ABO	false	-1.085946	theophylline (-1.085946) ABO
3421	-1.021526	prenylamine (-1.021526) AC159540.1.1	false	-1.021526	prenylamine (-1.021526) AC159540.1.1
5466	2.119771	doxylamine (2.119771) LL22NC03-2H8.5	false	2.119771	doxylamine (2.119771) LL22NC03-2H8.5
2553	-1.08383	fenbendazole (-1.08383) RP11-473M20.14	false	-1.08383	fenbendazole (-1.08383) RP11-473M20.14
2828	-1.301996	hycanthone (-1.301996) MCM3AP-AS1	false	-1.301996	hycanthone (-1.301996) MCM3AP-AS1
2536	1.006274	flunisolide (1.006274) RP11-667K14.3	false	1.006274	flunisolide (1.006274) RP11-667K14.3
3802	-1.148803	guaifenesin (-1.148803) LL22NC03-2H8.5	false	-1.148803	guaifenesin (-1.148803) LL22NC03-2H8.5
5681	1.229923333	trichostatin A (1.229923333) CASP8AP2	false	1.229923333	trichostatin A (1.229923333) CASP8AP2
3066	-1.369618	indoprofen (-1.369618) FAM182A	false	-1.369618	indoprofen (-1.369618) FAM182A
5367	1.093593	idoxuridine (1.093593) LINC00965	false	1.093593	idoxuridine (1.093593) LINC00965
5325	1.041715	diflunisal (1.041715) LINC00094	false	1.041715	diflunisal (1.041715) LINC00094
1849	1.24728	octopamine (1.24728) RP11-667K14.3	false	1.24728	octopamine (1.24728) RP11-667K14.3
5030	1.9413805	withaferin A (1.9413805) MIR22HG	false	1.9413805	withaferin A (1.9413805) MIR22HG
3752	1.028167	isoetarine (1.028167) RP11-499E18.1.1	false	1.028167	isoetarine (1.028167) RP11-499E18.1.1
2199	1.223197	isoxsuprine (1.223197) DLEU2	false	1.223197	isoxsuprine (1.223197) DLEU2
5604	1.675495	piperlongumine (1.675495) RP4-564F22.2.1	false	1.675495	piperlongumine (1.675495) RP4-564F22.2.1
4221	-2.742051667	camptothecin (-2.742051667) CASP8AP2	false	-2.742051667	camptothecin (-2.742051667) CASP8AP2
4837	-1.233021333	LY-294002 (-1.233021333) AC005546.2	false	-1.233021333	LY-294002 (-1.233021333) AC005546.2
3565	1.466211	salsolidin (1.466211) ZNRD1-AS1	false	1.466211	salsolidin (1.466211) ZNRD1-AS1
2210	-1.694089	isoxsuprine (-1.694089) FAM182A	false	-1.694089	isoxsuprine (-1.694089) FAM182A
4857	1.6087115	vorinostat (1.6087115) LINC00094	false	1.6087115	vorinostat (1.6087115) LINC00094
3789	1.21544	androsterone (1.21544) AC012065.7.1	false	1.21544	androsterone (1.21544) AC012065.7.1
5271	1.469826	metronidazole (1.469826) RP11-348N5.7	false	1.469826	metronidazole (1.469826) RP11-348N5.7
1735	-1.188147	spironolactone (-1.188147) LL22NC03-2H8.5	false	-1.188147	spironolactone (-1.188147) LL22NC03-2H8.5
4487	-1.002305	ciprofloxacin (-1.002305) FGD5-AS1	false	-1.002305	ciprofloxacin (-1.002305) FGD5-AS1
4059	-1.327781	cephaeline (-1.327781) RP11-574K11.5.1	false	-1.327781	cephaeline (-1.327781) RP11-574K11.5.1
3010	-1.111663	(+/-)-catechin (-1.111663) FAM182A	false	-1.111663	(+/-)-catechin (-1.111663) FAM182A
4192	1.008737	salbutamol (1.008737) RP11-1148L6.5.1	false	1.008737	salbutamol (1.008737) RP11-1148L6.5.1
5272	1.5626	metronidazole (1.5626) CTB-55O6.4	false	1.5626	metronidazole (1.5626) CTB-55O6.4
4124	-1.627115	econazole (-1.627115) AC005943.5	false	-1.627115	econazole (-1.627115) AC005943.5
2072	1.366257	letrozole (1.366257) LINC00667	false	1.366257	letrozole (1.366257) LINC00667
2809	-1.107286	mitoxantrone (-1.107286) RP11-403P17.4.1	false	-1.107286	mitoxantrone (-1.107286) RP11-403P17.4.1
5244	-1.074679	pheniramine (-1.074679) RP11-1148L6.5.1	false	-1.074679	pheniramine (-1.074679) RP11-1148L6.5.1
5994	-1.376944	alpha-estradiol (-1.376944) AC005546.2	false	-1.376944	alpha-estradiol (-1.376944) AC005546.2
5868	1.22845	nocodazole (1.22845) RP11-566E18.3.1	false	1.22845	nocodazole (1.22845) RP11-566E18.3.1
3104	-1.211145	reserpine (-1.211145) RP5-1068E13.3.1	false	-1.211145	reserpine (-1.211145) RP5-1068E13.3.1
3854	1.618779	medrysone (1.618779) RP11-566E18.3.1	false	1.618779	medrysone (1.618779) RP11-566E18.3.1
4691	-1.321385	anisomycin (-1.321385) RP11-395B7.7.1	false	-1.321385	anisomycin (-1.321385) RP11-395B7.7.1
2519	-1.421202	cefotetan (-1.421202) RP11-1148L6.5.1	false	-1.421202	cefotetan (-1.421202) RP11-1148L6.5.1
1937	1.060355	alpha-ergocryptine (1.060355) RP11-148G20.1.1	false	1.060355	alpha-ergocryptine (1.060355) RP11-148G20.1.1
1417	-1.187935	SC-19220 (-1.187935) RP11-667K14.3	false	-1.187935	SC-19220 (-1.187935) RP11-667K14.3
4123	1.203683	econazole (1.203683) RP11-394A14.4	false	1.203683	econazole (1.203683) RP11-394A14.4
1359	-1.315083	1,4-chrysenequinone (-1.315083) CROCCP2	false	-1.315083	1,4-chrysenequinone (-1.315083) CROCCP2
2993	-1.342101	paromomycin (-1.342101) LL22NC03-2H8.5	false	-1.342101	paromomycin (-1.342101) LL22NC03-2H8.5
4117	1.0422	dimenhydrinate (1.0422) RP11-1148L6.5.1	false	1.0422	dimenhydrinate (1.0422) RP11-1148L6.5.1
3944	-1.238973	skimmianine (-1.238973) AC159540.1.1	false	-1.238973	skimmianine (-1.238973) AC159540.1.1
3258	-1.001288	asiaticoside (-1.001288) AC012065.7.1	false	-1.001288	asiaticoside (-1.001288) AC012065.7.1
1408	-1.435538	GW-8510 (-1.435538) RP11-163O17.1.1	false	-1.435538	GW-8510 (-1.435538) RP11-163O17.1.1
4833	-1.0182005	LY-294002 (-1.0182005) FAM182A	false	-1.0182005	LY-294002 (-1.0182005) FAM182A
5446	-1.224953	pyrimethamine (-1.224953) SNHG3	false	-1.224953	pyrimethamine (-1.224953) SNHG3
5345	1.118039	oxetacaine (1.118039) U47924.30	false	1.118039	oxetacaine (1.118039) U47924.30
4903	1.058409	15-delta prostaglandin J2 (1.058409) MIR22HG	false	1.058409	15-delta prostaglandin J2 (1.058409) MIR22HG
4666	1.212029	carcinine (1.212029) CROCCP2	false	1.212029	carcinine (1.212029) CROCCP2
1621	-1.054753	sulfametoxydiazine (-1.054753) AC012065.7.1	false	-1.054753	sulfametoxydiazine (-1.054753) AC012065.7.1
1955	-1.082355	benfotiamine (-1.082355) RP11-403P17.4.1	false	-1.082355	benfotiamine (-1.082355) RP11-403P17.4.1
3103	1.2087	reserpine (1.2087) MIR22HG	false	1.2087	reserpine (1.2087) MIR22HG
3903	-1.320003	cefalotin (-1.320003) LL22NC03-2H8.5	false	-1.320003	cefalotin (-1.320003) LL22NC03-2H8.5
4507	-1.027711	digitoxigenin (-1.027711) C12orf47	false	-1.027711	digitoxigenin (-1.027711) C12orf47
2743	1.102809	fluocinonide (1.102809) RP11-667K14.3	false	1.102809	fluocinonide (1.102809) RP11-667K14.3
4066	1.270829	digoxin (1.270829) RP11-680F8.4.1	false	1.270829	digoxin (1.270829) RP11-680F8.4.1
4840	1.000998	vorinostat (1.000998) RP11-101E13.5	false	1.000998	vorinostat (1.000998) RP11-101E13.5
2697	-1.088647	sulfamethoxypyridazine (-1.088647) LL22NC03-2H8.5	false	-1.088647	sulfamethoxypyridazine (-1.088647) LL22NC03-2H8.5
1792	-1.332821	rolipram (-1.332821) RP11-612B6.2.1	false	-1.332821	rolipram (-1.332821) RP11-612B6.2.1
5276	1.219017	metronidazole (1.219017) RP13-514E23.1.1	false	1.219017	metronidazole (1.219017) RP13-514E23.1.1
2053	1.397429	cefalonium (1.397429) CTD-2562J17.7.1	false	1.397429	cefalonium (1.397429) CTD-2562J17.7.1
2476	-1.322866	tenoxicam (-1.322866) RP11-395B7.2.1	false	-1.322866	tenoxicam (-1.322866) RP11-395B7.2.1
3488	-1.05719	benperidol (-1.05719) DGCR11	false	-1.05719	benperidol (-1.05719) DGCR11
3474	-1.339263	orciprenaline (-1.339263) AC012074.2.1	false	-1.339263	orciprenaline (-1.339263) AC012074.2.1
3658	-1.303992	securinine (-1.303992) LINC00483	false	-1.303992	securinine (-1.303992) LINC00483
3924	-1.023037	fluorometholone (-1.023037) RP11-148B6.1.1	false	-1.023037	fluorometholone (-1.023037) RP11-148B6.1.1
5902	-1.481197	resveratrol (-1.481197) AC005546.2	false	-1.481197	resveratrol (-1.481197) AC005546.2
5530	1.02747	sulfathiazole (1.02747) LINC00094	false	1.02747	sulfathiazole (1.02747) LINC00094
4342	1.181221	solanine (1.181221) C6orf208	false	1.181221	solanine (1.181221) C6orf208
4027	1.486367	bisacodyl (1.486367) KB-1460A1.5.1	false	1.486367	bisacodyl (1.486367) KB-1460A1.5.1
4662	-1.067439	carcinine (-1.067439) C9orf31	false	-1.067439	carcinine (-1.067439) C9orf31
5122	-1.127904	lanatoside C (-1.127904) FAM182A	false	-1.127904	lanatoside C (-1.127904) FAM182A
2114	-1.020536	seneciphylline (-1.020536) FAM182A	false	-1.020536	seneciphylline (-1.020536) FAM182A
4265	1.396925	lycorine (1.396925) RP11-163O17.1.1	false	1.396925	lycorine (1.396925) RP11-163O17.1.1
4708	-1.178991	anisomycin (-1.178991) PLK1S1	false	-1.178991	anisomycin (-1.178991) PLK1S1
5067	1.112702	isopropamide iodide (1.112702) RP11-152N13.16	false	1.112702	isopropamide iodide (1.112702) RP11-152N13.16
1740	1.071308	spiperone (1.071308) RP4-564F22.2.1	false	1.071308	spiperone (1.071308) RP4-564F22.2.1
3808	-1.242489	mephentermine (-1.242489) AC005546.2	false	-1.242489	mephentermine (-1.242489) AC005546.2
5750	-1.073105	gliclazide (-1.073105) AC005546.2	false	-1.073105	gliclazide (-1.073105) AC005546.2
1903	2.0581315	phenoxybenzamine (2.0581315) KB-1460A1.5.1	false	2.0581315	phenoxybenzamine (2.0581315) KB-1460A1.5.1
1317	1.196068	irinotecan (1.196068) MCM3AP-AS1	false	1.196068	irinotecan (1.196068) MCM3AP-AS1
5547	-1.048037	quipazine (-1.048037) RP11-394A14.4	false	-1.048037	quipazine (-1.048037) RP11-394A14.4
1523	-1.292047	loxapine (-1.292047) FGD5-AS1	false	-1.292047	loxapine (-1.292047) FGD5-AS1
5667	-1.097641	trichostatin A (-1.097641) RP1-302G2.5	false	-1.097641	trichostatin A (-1.097641) RP1-302G2.5
1431	1.545010333	thapsigargin (1.545010333) RP4-564F22.2.1	false	1.545010333	thapsigargin (1.545010333) RP4-564F22.2.1
2573	1.380315	mexiletine (1.380315) FGD5-AS1	false	1.380315	mexiletine (1.380315) FGD5-AS1
5513	-1.221201	sulfathiazole (-1.221201) DGCR11	false	-1.221201	sulfathiazole (-1.221201) DGCR11
2323	-1.591178	naftopidil (-1.591178) DGCR5	false	-1.591178	naftopidil (-1.591178) DGCR5
5739	1.603878733	trichostatin A (1.603878733) LL22NC03-2H8.5	false	1.603878733	trichostatin A (1.603878733) LL22NC03-2H8.5
2547	-1.405673	ethotoin (-1.405673) RP11-474N8.5.1	false	-1.405673	ethotoin (-1.405673) RP11-474N8.5.1
2393	-1.277144	galantamine (-1.277144) DGCR11	false	-1.277144	galantamine (-1.277144) DGCR11
4357	-1.501939	emetine (-1.501939) RP11-148B6.1.1	false	-1.501939	emetine (-1.501939) RP11-148B6.1.1
5610	2.935099	piperlongumine (2.935099) MIR22HG	false	2.935099	piperlongumine (2.935099) MIR22HG
5874	-1.546909	dizocilpine (-1.546909) RP11-394A14.4	false	-1.546909	dizocilpine (-1.546909) RP11-394A14.4
4498	1.594372	primaquine (1.594372) RP11-203B9.4.1	false	1.594372	primaquine (1.594372) RP11-203B9.4.1
5170	1.52459	chlortetracycline (1.52459) RP11-655M14.13.1	false	1.52459	chlortetracycline (1.52459) RP11-655M14.13.1
4076	-1.008979	digoxin (-1.008979) BX004987.5.1	false	-1.008979	digoxin (-1.008979) BX004987.5.1
4136	-1.455075	telenzepine (-1.455075) LL22NC03-2H8.5	false	-1.455075	telenzepine (-1.455075) LL22NC03-2H8.5
5144	-1.041088	N-acetyl-L-aspartic acid (-1.041088) RP11-612B6.2.1	false	-1.041088	N-acetyl-L-aspartic acid (-1.041088) RP11-612B6.2.1
3301	-1.044064	zardaverine (-1.044064) RP11-286E11.2.1	false	-1.044064	zardaverine (-1.044064) RP11-286E11.2.1
5137	-1.135161	atracurium besilate (-1.135161) AC005943.5	false	-1.135161	atracurium besilate (-1.135161) AC005943.5
4659	-1.607094	carcinine (-1.607094) U66059.58.1	false	-1.607094	carcinine (-1.607094) U66059.58.1
1983	-1.003516	cyclobenzaprine (-1.003516) U66059.58.1	false	-1.003516	cyclobenzaprine (-1.003516) U66059.58.1
1514	-1.056162	hesperidin (-1.056162) LL22NC03-2H8.5	false	-1.056162	hesperidin (-1.056162) LL22NC03-2H8.5
3601	-1.035084	boldine (-1.035084) AC159540.1.1	false	-1.035084	boldine (-1.035084) AC159540.1.1
4646	1.329881	SR-95531 (1.329881) ZNRD1-AS1	false	1.329881	SR-95531 (1.329881) ZNRD1-AS1
3337	-1.061131	epitiostanol (-1.061131) MEG3	false	-1.061131	epitiostanol (-1.061131) MEG3
3579	-1.111402	hydroxyachillin (-1.111402) DGCR5	false	-1.111402	hydroxyachillin (-1.111402) DGCR5
4780	1.017167	monorden (1.017167) RP11-667K14.3	false	1.017167	monorden (1.017167) RP11-667K14.3
3914	1.256245	hexestrol (1.256245) RP11-403P17.4.1	false	1.256245	hexestrol (1.256245) RP11-403P17.4.1
2965	1.223933	latamoxef (1.223933) AL928768.3.1	false	1.223933	latamoxef (1.223933) AL928768.3.1
6041	1.133307	dexverapamil (1.133307) RP11-429B14.4.1	false	1.133307	dexverapamil (1.133307) RP11-429B14.4.1
5502	1.563602	cimetidine (1.563602) RP4-802A10.1	false	1.563602	cimetidine (1.563602) RP4-802A10.1
4617	1.7921975	apigenin (1.7921975) RP11-1148L6.5.1	false	1.7921975	apigenin (1.7921975) RP11-1148L6.5.1
3356	-1.1624985	proscillaridin (-1.1624985) SNHG3	false	-1.1624985	proscillaridin (-1.1624985) SNHG3
5193	-1.497443	danazol (-1.497443) CASP8AP2	false	-1.497443	danazol (-1.497443) CASP8AP2
2680	-1.065507	fenbufen (-1.065507) RP11-517A5.4	false	-1.065507	fenbufen (-1.065507) RP11-517A5.4
5037	-1.47126	nicotinic acid (-1.47126) FGD5-AS1	false	-1.47126	nicotinic acid (-1.47126) FGD5-AS1
4377	2.090581	emetine (2.090581) RP4-564F22.2.1	false	2.090581	emetine (2.090581) RP4-564F22.2.1
2625	1.011321	0175029-0000 (1.011321) MT1P3	false	1.011321	0175029-0000 (1.011321) MT1P3
2264	-1.207636	canavanine (-1.207636) AC009299.3.1	false	-1.207636	canavanine (-1.207636) AC009299.3.1
5489	1.016837	amiloride (1.016837) DLEU2	false	1.016837	amiloride (1.016837) DLEU2
4287	-2.296705	lycorine (-2.296705) WT1-AS	false	-2.296705	lycorine (-2.296705) WT1-AS
4214	-1.99399	camptothecin (-1.99399) C14orf169	false	-1.99399	camptothecin (-1.99399) C14orf169
5782	1.04216	debrisoquine (1.04216) SMAD5-AS1	false	1.04216	debrisoquine (1.04216) SMAD5-AS1
4178	1.174235	nefopam (1.174235) AC159540.1.1	false	1.174235	nefopam (1.174235) AC159540.1.1
3266	1.880486	alprostadil (1.880486) RP11-403C10.2.1	false	1.880486	alprostadil (1.880486) RP11-403C10.2.1
4145	1.074226	doxepin (1.074226) AD000090.2.1	false	1.074226	doxepin (1.074226) AD000090.2.1
3731	1.181264	pridinol (1.181264) PDXDC2P	false	1.181264	pridinol (1.181264) PDXDC2P
5469	-1.307531	doxylamine (-1.307531) RP11-612B6.2.1	false	-1.307531	doxylamine (-1.307531) RP11-612B6.2.1
3328	-1.355887	epitiostanol (-1.355887) RP11-170N11.1.1	false	-1.355887	epitiostanol (-1.355887) RP11-170N11.1.1
3161	2.244276	fosfosal (2.244276) LL22NC03-2H8.5	false	2.244276	fosfosal (2.244276) LL22NC03-2H8.5
2065	-1.220531	cefalonium (-1.220531) CYP4F8	false	-1.220531	cefalonium (-1.220531) CYP4F8
1879	-1.060602	fursultiamine (-1.060602) AC005546.2	false	-1.060602	fursultiamine (-1.060602) AC005546.2
5437	-1.079707	pyrimethamine (-1.079707) RP1-302G2.5	false	-1.079707	pyrimethamine (-1.079707) RP1-302G2.5
3442	-1.323125	colistin (-1.323125) U66059.58.1	false	-1.323125	colistin (-1.323125) U66059.58.1
1782	-1.253442	desoxycortone (-1.253442) RP11-612B6.2.1	false	-1.253442	desoxycortone (-1.253442) RP11-612B6.2.1
2050	1.337227	cefalonium (1.337227) U47924.30	false	1.337227	cefalonium (1.337227) U47924.30
3700	-2.244666	cicloheximide (-2.244666) MCM3AP-AS1	false	-2.244666	cicloheximide (-2.244666) MCM3AP-AS1
4884	1.090957	30-delta prostaglandin J2 (1.090957) HLA-F-AS1	false	1.090957	30-delta prostaglandin J2 (1.090957) HLA-F-AS1
5915	1.125335	geldanamycin (1.125335) RP11-403P17.4.1	false	1.125335	geldanamycin (1.125335) RP11-403P17.4.1
3761	-1.172888	corbadrine (-1.172888) LINC00483	false	-1.172888	corbadrine (-1.172888) LINC00483
4125	-1.092728	diethylcarbamazine (-1.092728) LL22NC03-2H8.5	false	-1.092728	diethylcarbamazine (-1.092728) LL22NC03-2H8.5
5252	2.123994	chlorhexidine (2.123994) RP11-517A5.4	false	2.123994	chlorhexidine (2.123994) RP11-517A5.4
5548	1.194866	isocorydine (1.194866) LL22NC03-2H8.5	false	1.194866	isocorydine (1.194866) LL22NC03-2H8.5
5569	-1.001412	lobeline (-1.001412) RP11-977G19.11.1	false	-1.001412	lobeline (-1.001412) RP11-977G19.11.1
1858	1.089947	fluspirilene (1.089947) FGD5-AS1	false	1.089947	fluspirilene (1.089947) FGD5-AS1
2156	-1.355655	quinisocaine (-1.355655) RP11-655M14.13.1	false	-1.355655	quinisocaine (-1.355655) RP11-655M14.13.1
1538	1.175618	apramycin (1.175618) RP1-68D18.4.1	false	1.175618	apramycin (1.175618) RP1-68D18.4.1
2566	-1.274595	rifabutin (-1.274595) LINC00338	false	-1.274595	rifabutin (-1.274595) LINC00338
5524	-1.020869	sulfathiazole (-1.020869) RP11-499P20.2.1	false	-1.020869	sulfathiazole (-1.020869) RP11-499P20.2.1
4800	-1.042659	sirolimus (-1.042659) LINC00483	false	-1.042659	sirolimus (-1.042659) LINC00483
4251	-1.074477	terfenadine (-1.074477) AD000090.2.1	false	-1.074477	terfenadine (-1.074477) AD000090.2.1
4364	1.259393	emetine (1.259393) LINC00338	false	1.259393	emetine (1.259393) LINC00338
2962	1.357128	latamoxef (1.357128) RP11-566E18.3.1	false	1.357128	latamoxef (1.357128) RP11-566E18.3.1
3113	1.508132	simvastatin (1.508132) CTD-2562J17.7.1	false	1.508132	simvastatin (1.508132) CTD-2562J17.7.1
2258	-1.153124	canavanine (-1.153124) RP11-170N11.1.1	false	-1.153124	canavanine (-1.153124) RP11-170N11.1.1
3847	1.526382	meclofenoxate (1.526382) LINC00483	false	1.526382	meclofenoxate (1.526382) LINC00483
4727	1.433937	ouabain (1.433937) RP11-203B9.4.1	false	1.433937	ouabain (1.433937) RP11-203B9.4.1
1624	-1.022928	tetrahydroalstonine (-1.022928) AC012065.7.1	false	-1.022928	tetrahydroalstonine (-1.022928) AC012065.7.1
3132	-1.132091	trichlormethiazide (-1.132091) RP11-655M14.13.1	false	-1.132091	trichlormethiazide (-1.132091) RP11-655M14.13.1
3152	1.169881	trichlormethiazide (1.169881) MIR22HG	false	1.169881	trichlormethiazide (1.169881) MIR22HG
3231	1.015901	loracarbef (1.015901) U47924.30	false	1.015901	loracarbef (1.015901) U47924.30
1436	1.681981	alsterpaullone (1.681981) RP11-255C15.3.1	false	1.681981	alsterpaullone (1.681981) RP11-255C15.3.1
2466	-1.385943	trimethadione (-1.385943) IDI2-AS1	false	-1.385943	trimethadione (-1.385943) IDI2-AS1
4653	1.211421	carcinine (1.211421) U47924.30	false	1.211421	carcinine (1.211421) U47924.30
4811	-1.389103	fulvestrant (-1.389103) RP11-148B6.1.1	false	-1.389103	fulvestrant (-1.389103) RP11-148B6.1.1
4682	2.4234265	anisomycin (2.4234265) RP11-20D14.6.1	false	2.4234265	anisomycin (2.4234265) RP11-20D14.6.1
3732	-1.050886	pridinol (-1.050886) LINC00483	false	-1.050886	pridinol (-1.050886) LINC00483
4660	1.407235	carcinine (1.407235) AD000090.2.1	false	1.407235	carcinine (1.407235) AD000090.2.1
5089	-1.191134	nalidixic acid (-1.191134) RP1-68D18.4.1	false	-1.191134	nalidixic acid (-1.191134) RP1-68D18.4.1
5716	-1.2154328	trichostatin A (-1.2154328) RP11-259N19.1	false	-1.2154328	trichostatin A (-1.2154328) RP11-259N19.1
2550	1.247313	2,6-dimethylpiperidine (1.247313) AC012074.2.1	false	1.247313	2,6-dimethylpiperidine (1.247313) AC012074.2.1
5672	-1.434903	trichostatin A (-1.434903) U66059.58.1	false	-1.434903	trichostatin A (-1.434903) U66059.58.1
2846	1.279699	fendiline (1.279699) RP4-564F22.2.1	false	1.279699	fendiline (1.279699) RP4-564F22.2.1
2364	1.111086	meptazinol (1.111086) CASP8AP2	false	1.111086	meptazinol (1.111086) CASP8AP2
4855	1.283858	vorinostat (1.283858) RP11-49C24.1.1	false	1.283858	vorinostat (1.283858) RP11-49C24.1.1
3857	1.101294	medrysone (1.101294) RP11-499P20.2.1	false	1.101294	medrysone (1.101294) RP11-499P20.2.1
5863	1.167527	ampyrone (1.167527) AC009299.3.1	false	1.167527	ampyrone (1.167527) AC009299.3.1
5638	1.194032	tubocurarine chloride (1.194032) AC004840.9.1	false	1.194032	tubocurarine chloride (1.194032) AC004840.9.1
3516	1.117165	benperidol (1.117165) RP11-403C10.2.1	false	1.117165	benperidol (1.117165) RP11-403C10.2.1
2569	-1.013169	nialamide (-1.013169) RP11-49C24.1.1	false	-1.013169	nialamide (-1.013169) RP11-49C24.1.1
1464	1.487736	lomustine (1.487736) MIR22HG	false	1.487736	lomustine (1.487736) MIR22HG
2407	-1.065643	galantamine (-1.065643) RP11-499P20.2.1	false	-1.065643	galantamine (-1.065643) RP11-499P20.2.1
3133	2.038243	trichlormethiazide (2.038243) CTD-2562J17.7.1	false	2.038243	trichlormethiazide (2.038243) CTD-2562J17.7.1
1585	-1.432383	meglumine (-1.432383) FGD5-AS1	false	-1.432383	meglumine (-1.432383) FGD5-AS1
2892	-2.01311	cantharidin (-2.01311) SNHG3	false	-2.01311	cantharidin (-2.01311) SNHG3
4399	-1.074595	pindolol (-1.074595) RP11-148G20.1.1	false	-1.074595	pindolol (-1.074595) RP11-148G20.1.1
1869	1.035907	daunorubicin (1.035907) RP11-612B6.2.1	false	1.035907	daunorubicin (1.035907) RP11-612B6.2.1
2414	-1.103569	galantamine (-1.103569) RP11-74N20.1.1	false	-1.103569	galantamine (-1.103569) RP11-74N20.1.1
3278	-1.48503	sanguinarine (-1.48503) AC012065.7.1	false	-1.48503	sanguinarine (-1.48503) AC012065.7.1
3958	1.316674	nifuroxazide (1.316674) LINC00667	false	1.316674	nifuroxazide (1.316674) LINC00667
4979	2.137744	trimethylcolchicinic acid (2.137744) RP11-499E18.1.1	false	2.137744	trimethylcolchicinic acid (2.137744) RP11-499E18.1.1
2782	-1.2124	doxorubicin (-1.2124) LL22NC03-2H8.5	false	-1.2124	doxorubicin (-1.2124) LL22NC03-2H8.5
1571	1.239427	benserazide (1.239427) RP11-395B7.2.1	false	1.239427	benserazide (1.239427) RP11-395B7.2.1
1938	1.346056	thiamazole (1.346056) RP11-1148L6.5.1	false	1.346056	thiamazole (1.346056) RP11-1148L6.5.1
2882	-1.186442	terguride (-1.186442) LL22NC03-2H8.5	false	-1.186442	terguride (-1.186442) LL22NC03-2H8.5
3502	-1.178455	benperidol (-1.178455) RP11-170N11.1.1	false	-1.178455	benperidol (-1.178455) RP11-170N11.1.1
5191	1.626008	danazol (1.626008) RP11-395B7.2.1	false	1.626008	danazol (1.626008) RP11-395B7.2.1
5888	1.116301	clindamycin (1.116301) IGF2-AS	false	1.116301	clindamycin (1.116301) IGF2-AS
3187	-1.4591735	procyclidine (-1.4591735) RP11-612B6.2.1	false	-1.4591735	procyclidine (-1.4591735) RP11-612B6.2.1
4111	-1.437074	pergolide (-1.437074) AC005943.5	false	-1.437074	pergolide (-1.437074) AC005943.5
4486	-1.017182	moroxydine (-1.017182) AC005943.5	false	-1.017182	moroxydine (-1.017182) AC005943.5
5150	1.194989	fusaric acid (1.194989) RP11-148B6.1.1	false	1.194989	fusaric acid (1.194989) RP11-148B6.1.1
4604	-1.087193	cefadroxil (-1.087193) AC012065.7.1	false	-1.087193	cefadroxil (-1.087193) AC012065.7.1
5388	-1.18699	idoxuridine (-1.18699) AC009299.3.1	false	-1.18699	idoxuridine (-1.18699) AC009299.3.1
4245	-1.1928	iproniazid (-1.1928) RP11-667K14.3	false	-1.1928	iproniazid (-1.1928) RP11-667K14.3
2675	-1.129469	PNU-0230031 (-1.129469) RP11-517A5.4	false	-1.129469	PNU-0230031 (-1.129469) RP11-517A5.4
2803	1.092997	buflomedil (1.092997) RP11-667K14.3	false	1.092997	buflomedil (1.092997) RP11-667K14.3
5180	1.155598	danazol (1.155598) CTB-55O6.4	false	1.155598	danazol (1.155598) CTB-55O6.4
3910	-1.018053	trioxysalen (-1.018053) FAM182A	false	-1.018053	trioxysalen (-1.018053) FAM182A
2309	-1.608898	lumicolchicine (-1.608898) RP5-1068E13.3.1	false	-1.608898	lumicolchicine (-1.608898) RP5-1068E13.3.1
3788	1.009201	domperidone (1.009201) AC012065.7.1	false	1.009201	domperidone (1.009201) AC012065.7.1
2109	-1.470602	seneciphylline (-1.470602) AC012074.2.1	false	-1.470602	seneciphylline (-1.470602) AC012074.2.1
2775	-1.009616	pilocarpine (-1.009616) RP11-655M14.13.1	false	-1.009616	pilocarpine (-1.009616) RP11-655M14.13.1
3410	-1.325433	etofenamate (-1.325433) AC159540.1.1	false	-1.325433	etofenamate (-1.325433) AC159540.1.1
5201	-1.160531	diltiazem (-1.160531) RP11-394A14.4	false	-1.160531	diltiazem (-1.160531) RP11-394A14.4
3315	-1.104381	epitiostanol (-1.104381) AC084219.3	false	-1.104381	epitiostanol (-1.104381) AC084219.3
3038	-1.234729	mestranol (-1.234729) AC009299.3.1	false	-1.234729	mestranol (-1.234729) AC009299.3.1
4200	1.199171	camptothecin (1.199171) C12orf47	false	1.199171	camptothecin (1.199171) C12orf47
4913	-1.018451	ursodeoxycholic acid (-1.018451) LL22NC03-2H8.5	false	-1.018451	ursodeoxycholic acid (-1.018451) LL22NC03-2H8.5
4330	-1.037612	eldeline (-1.037612) AC005546.2	false	-1.037612	eldeline (-1.037612) AC005546.2
5279	1.646815	metronidazole (1.646815) AC012065.7.1	false	1.646815	metronidazole (1.646815) AC012065.7.1
3724	1.192053	hecogenin (1.192053) PDXDC2P	false	1.192053	hecogenin (1.192053) PDXDC2P
3858	-1.924134	medrysone (-1.924134) DLEU2	false	-1.924134	medrysone (-1.924134) DLEU2
4763	-1.051223	troglitazone (-1.051223) LL22NC03-2H8.5	false	-1.051223	troglitazone (-1.051223) LL22NC03-2H8.5
4309	-1.91791525	helveticoside (-1.91791525) AD000090.2.1	false	-1.91791525	helveticoside (-1.91791525) AD000090.2.1
4790	-1.072917	alvespimycin (-1.072917) AC005546.2	false	-1.072917	alvespimycin (-1.072917) AC005546.2
4754	1.187865	thioguanosine (1.187865) C14orf169	false	1.187865	thioguanosine (1.187865) C14orf169
3203	1.42909	theophylline (1.42909) RP11-499E18.1.1	false	1.42909	theophylline (1.42909) RP11-499E18.1.1
1461	1.148515	lomustine (1.148515) PLK1S1	false	1.148515	lomustine (1.148515) PLK1S1
1917	-1.247389	benzylpenicillin (-1.247389) RP11-394A14.4	false	-1.247389	benzylpenicillin (-1.247389) RP11-394A14.4
5919	1.050147	fisetin (1.050147) AC091132.1.1	false	1.050147	fisetin (1.050147) AC091132.1.1
3336	1.294537	epitiostanol (1.294537) LINC00339	false	1.294537	epitiostanol (1.294537) LINC00339
3951	1.199864	quercetin (1.199864) RP11-395B7.7.1	false	1.199864	quercetin (1.199864) RP11-395B7.7.1
3665	-1.071077	azlocillin (-1.071077) RP11-566E18.3.1	false	-1.071077	azlocillin (-1.071077) RP11-566E18.3.1
2910	-1.426338	digoxigenin (-1.426338) RP11-473M20.14	false	-1.426338	digoxigenin (-1.426338) RP11-473M20.14
5742	-1.118954	etamivan (-1.118954) RP11-163O17.1.1	false	-1.118954	etamivan (-1.118954) RP11-163O17.1.1
3159	-1.522369	trichlormethiazide (-1.522369) RP3-522P13.3.1	false	-1.522369	trichlormethiazide (-1.522369) RP3-522P13.3.1
3316	1.226468	epitiostanol (1.226468) LINC00667	false	1.226468	epitiostanol (1.226468) LINC00667
5381	-1.302397	idoxuridine (-1.302397) RP11-170N11.1.1	false	-1.302397	idoxuridine (-1.302397) RP11-170N11.1.1
1768	-1.096894	amoxicillin (-1.096894) RP11-1148L6.5.1	false	-1.096894	amoxicillin (-1.096894) RP11-1148L6.5.1
3446	-1.342684	colistin (-1.342684) EGOT	false	-1.342684	colistin (-1.342684) EGOT
6027	-1.255088	staurosporine (-1.255088) CROCCP2	false	-1.255088	staurosporine (-1.255088) CROCCP2
2745	-1.033387	eticlopride (-1.033387) RP11-403C10.2.1	false	-1.033387	eticlopride (-1.033387) RP11-403C10.2.1
4089	1.539782	perhexiline (1.539782) RP11-1148L6.5.1	false	1.539782	perhexiline (1.539782) RP11-1148L6.5.1
2657	-1.013186	0179445-0000 (-1.013186) LINC00094	false	-1.013186	0179445-0000 (-1.013186) LINC00094
1848	1.161721	allantoin (1.161721) RP11-574K11.5.1	false	1.161721	allantoin (1.161721) RP11-574K11.5.1
1300	1.17466	irinotecan (1.17466) RP11-394A14.4	false	1.17466	irinotecan (1.17466) RP11-394A14.4
4323	-1.095113	halcinonide (-1.095113) FAM182A	false	-1.095113	halcinonide (-1.095113) FAM182A
4232	-1.033761	clemizole (-1.033761) AC005546.2	false	-1.033761	clemizole (-1.033761) AC005546.2
5355	-1.14153	oxetacaine (-1.14153) AC012074.2.1	false	-1.14153	oxetacaine (-1.14153) AC012074.2.1
4467	-1.780159	8-azaguanine (-1.780159) LL22NC03-2H8.5	false	-1.780159	8-azaguanine (-1.780159) LL22NC03-2H8.5
2957	-1.119584	capsaicin (-1.119584) AC159540.1.1	false	-1.119584	capsaicin (-1.119584) AC159540.1.1
3558	-1.32712	salsolidin (-1.32712) U66059.58.1	false	-1.32712	salsolidin (-1.32712) U66059.58.1
2379	-1.517482	spectinomycin (-1.517482) DGCR5	false	-1.517482	spectinomycin (-1.517482) DGCR5
1393	-1.285959	GW-8510 (-1.285959) RP11-403P17.4.1	false	-1.285959	GW-8510 (-1.285959) RP11-403P17.4.1
4005	1.016678	dinoprost (1.016678) RP5-1068E13.3.1	false	1.016678	dinoprost (1.016678) RP5-1068E13.3.1
5983	-1.028403	thioridazine (-1.028403) DLEU2	false	-1.028403	thioridazine (-1.028403) DLEU2
3322	-2.137905	epitiostanol (-2.137905) RP11-148B6.1.1	false	-2.137905	epitiostanol (-2.137905) RP11-148B6.1.1
4547	1.020836	mebhydrolin (1.020836) RP11-203B9.4.1	false	1.020836	mebhydrolin (1.020836) RP11-203B9.4.1
2530	-1.170209	pempidine (-1.170209) RP11-405O10.2.1	false	-1.170209	pempidine (-1.170209) RP11-405O10.2.1
1663	1.089703	H-7 (1.089703) RP11-649A18.7	false	1.089703	H-7 (1.089703) RP11-649A18.7
4960	-1.133791	propantheline bromide (-1.133791) RP11-612B6.2.1	false	-1.133791	propantheline bromide (-1.133791) RP11-612B6.2.1
2100	1.359843	seneciphylline (1.359843) CTD-2562J17.7.1	false	1.359843	seneciphylline (1.359843) CTD-2562J17.7.1
4799	-1.01615	sirolimus (-1.01615) FAM182A	false	-1.01615	sirolimus (-1.01615) FAM182A
1543	-1.325659	PNU-0293363 (-1.325659) SNHG3	false	-1.325659	PNU-0293363 (-1.325659) SNHG3
3169	-1.066375	fosfosal (-1.066375) DGCR5	false	-1.066375	fosfosal (-1.066375) DGCR5
4902	-1.008003	16-delta prostaglandin J2 (-1.008003) AC005546.2	false	-1.008003	16-delta prostaglandin J2 (-1.008003) AC005546.2
4862	2.1972988	vorinostat (2.1972988) RP11-655M14.13.1	false	2.1972988	vorinostat (2.1972988) RP11-655M14.13.1
3803	-1.13897	guaifenesin (-1.13897) RP11-394A14.4	false	-1.13897	guaifenesin (-1.13897) RP11-394A14.4
4673	2.061388	anisomycin (2.061388) RP11-655M14.13.1	false	2.061388	anisomycin (2.061388) RP11-655M14.13.1
5617	2.84072	ajmaline (2.84072) RP11-517A5.4	false	2.84072	ajmaline (2.84072) RP11-517A5.4
4866	1.2929975	vorinostat (1.2929975) LINC00312	false	1.2929975	vorinostat (1.2929975) LINC00312
3031	-1.175218	mestranol (-1.175218) RP11-170N11.1.1	false	-1.175218	mestranol (-1.175218) RP11-170N11.1.1
1590	3.763716	C-75 (3.763716) RP11-72I8.1.1	false	3.763716	C-75 (3.763716) RP11-72I8.1.1
1447	1.615763	alsterpaullone (1.615763) SNHG3	false	1.615763	alsterpaullone (1.615763) SNHG3
4087	1.167245	clemastine (1.167245) AD000090.2.1	false	1.167245	clemastine (1.167245) AD000090.2.1
5953	1.001416	tanespimycin (1.001416) AC007319.1.1	false	1.001416	tanespimycin (1.001416) AC007319.1.1
3067	1.107567	indoprofen (1.107567) RP11-148G20.1.1	false	1.107567	indoprofen (1.107567) RP11-148G20.1.1
3839	-2.788646	meclofenoxate (-2.788646) RP11-394A14.4	false	-2.788646	meclofenoxate (-2.788646) RP11-394A14.4
3628	-1.273731	methazolamide (-1.273731) LL22NC03-2H8.5	false	-1.273731	methazolamide (-1.273731) LL22NC03-2H8.5
3644	1.164199	gabapentin (1.164199) RP11-1148L6.5.1	false	1.164199	gabapentin (1.164199) RP11-1148L6.5.1
4274	-2.136114	lycorine (-2.136114) CTD-2562J17.7.1	false	-2.136114	lycorine (-2.136114) CTD-2562J17.7.1
3213	1.125963	theophylline (1.125963) CROCCP2	false	1.125963	theophylline (1.125963) CROCCP2
3545	1.017371	selegiline (1.017371) FAM182A	false	1.017371	selegiline (1.017371) FAM182A
1604	-1.056508	F0447-0125 (-1.056508) AC005546.2	false	-1.056508	F0447-0125 (-1.056508) AC005546.2
1489	-1.033876	0297417-0002B (-1.033876) C14orf169	false	-1.033876	0297417-0002B (-1.033876) C14orf169
3975	-1.22269	thiostrepton (-1.22269) RP11-617F23.1.1	false	-1.22269	thiostrepton (-1.22269) RP11-617F23.1.1
1548	1.107207	STOCK1N-35696 (1.107207) MAP3K14	false	1.107207	STOCK1N-35696 (1.107207) MAP3K14
2715	-1.1109	(-)-isoprenaline (-1.1109) LL22NC03-2H8.5	false	-1.1109	(-)-isoprenaline (-1.1109) LL22NC03-2H8.5
2439	1.710298	probenecid (1.710298) RP11-499E18.1.1	false	1.710298	probenecid (1.710298) RP11-499E18.1.1
2337	1.111552	naftopidil (1.111552) CASP8AP2	false	1.111552	naftopidil (1.111552) CASP8AP2
4295	-1.107757	helveticoside (-1.107757) BX004987.5.1	false	-1.107757	helveticoside (-1.107757) BX004987.5.1
3237	1.299411	pyrvinium (1.299411) MIR22HG	false	1.299411	pyrvinium (1.299411) MIR22HG
5247	1.02519	ethambutol (1.02519) RP11-403P17.4.1	false	1.02519	ethambutol (1.02519) RP11-403P17.4.1
5659	-1.407283	trichostatin A (-1.407283) TUG1	false	-1.407283	trichostatin A (-1.407283) TUG1
5394	1.388457	idoxuridine (1.388457) MIR22HG	false	1.388457	idoxuridine (1.388457) MIR22HG
3294	-1.450611	sanguinarine (-1.450611) LINC00341	false	-1.450611	sanguinarine (-1.450611) LINC00341
2522	1.164913	cinchonine (1.164913) RP11-203B9.4.1	false	1.164913	cinchonine (1.164913) RP11-203B9.4.1
6021	-1.233286	estradiol (-1.233286) RP11-1148L6.5.1	false	-1.233286	estradiol (-1.233286) RP11-1148L6.5.1
5143	1.033847	N-acetyl-L-aspartic acid (1.033847) RP11-667K14.3	false	1.033847	N-acetyl-L-aspartic acid (1.033847) RP11-667K14.3
5094	-1.098636	lanatoside C (-1.098636) RP11-574K11.5.1	false	-1.098636	lanatoside C (-1.098636) RP11-574K11.5.1
5647	-1.251324	parthenolide (-1.251324) RP11-473M20.14	false	-1.251324	parthenolide (-1.251324) RP11-473M20.14
4826	1.2873325	LY-294002 (1.2873325) LINC00342	false	1.2873325	LY-294002 (1.2873325) LINC00342
3981	-1.0654	thiostrepton (-1.0654) SNHG14	false	-1.0654	thiostrepton (-1.0654) SNHG14
5281	1.109764	metronidazole (1.109764) RP11-474N8.5.1	false	1.109764	metronidazole (1.109764) RP11-474N8.5.1
5155	-1.072843	nordihydroguaiaretic acid (-1.072843) RP11-1148L6.5.1	false	-1.072843	nordihydroguaiaretic acid (-1.072843) RP11-1148L6.5.1
5666	-1.032377	trichostatin A (-1.032377) DGCR11	false	-1.032377	trichostatin A (-1.032377) DGCR11
1975	1.093608	dydrogesterone (1.093608) AD000090.2.1	false	1.093608	dydrogesterone (1.093608) AD000090.2.1
3381	-1.466442	molindone (-1.466442) RP11-286E11.2.1	false	-1.466442	molindone (-1.466442) RP11-286E11.2.1
4246	-1.07325	nifenazone (-1.07325) RP11-1148L6.5.1	false	-1.07325	nifenazone (-1.07325) RP11-1148L6.5.1
3000	1.208305	(+/-)-catechin (1.208305) LINC00667	false	1.208305	(+/-)-catechin (1.208305) LINC00667
2636	1.136051	riluzole (1.136051) FGD5-AS1	false	1.136051	riluzole (1.136051) FGD5-AS1
5877	-1.103264	nalbuphine (-1.103264) KIR3DP1	false	-1.103264	nalbuphine (-1.103264) KIR3DP1
3437	-1.188323	colistin (-1.188323) RP11-655M14.13.1	false	-1.188323	colistin (-1.188323) RP11-655M14.13.1
2895	-1.886232	cantharidin (-1.886232) RP11-203B9.4.1	false	-1.886232	cantharidin (-1.886232) RP11-203B9.4.1
4351	1.414699	emetine (1.414699) LINC00667	false	1.414699	emetine (1.414699) LINC00667
2316	-1.361021	naftopidil (-1.361021) RP11-612B6.2.1	false	-1.361021	naftopidil (-1.361021) RP11-612B6.2.1
2219	-1.326211	atovaquone (-1.326211) RP11-655M14.13.1	false	-1.326211	atovaquone (-1.326211) RP11-655M14.13.1
5568	1.192512	lobeline (1.192512) AC012065.7.1	false	1.192512	lobeline (1.192512) AC012065.7.1
4268	-1.139388333	lycorine (-1.139388333) RP11-152N13.16	false	-1.139388333	lycorine (-1.139388333) RP11-152N13.16
5760	-1.504532	dirithromycin (-1.504532) CASP8AP2	false	-1.504532	dirithromycin (-1.504532) CASP8AP2
2855	-1.128218	pimozide (-1.128218) DLEU2	false	-1.128218	pimozide (-1.128218) DLEU2
4590	1.181543	pepstatin (1.181543) RP11-203B9.4.1	false	1.181543	pepstatin (1.181543) RP11-203B9.4.1
3364	-1.094509	proscillaridin (-1.094509) RP4-564F22.2.1	false	-1.094509	proscillaridin (-1.094509) RP4-564F22.2.1
4052	-1.993322	cephaeline (-1.993322) RP11-617F23.1.1	false	-1.993322	cephaeline (-1.993322) RP11-617F23.1.1
1576	-1.752894	dexibuprofen (-1.752894) RP11-1148L6.5.1	false	-1.752894	dexibuprofen (-1.752894) RP11-1148L6.5.1
3079	-1.57777	reserpine (-1.57777) RP11-612B6.2.1	false	-1.57777	reserpine (-1.57777) RP11-612B6.2.1
4520	-1.723271	digitoxigenin (-1.723271) C14orf169	false	-1.723271	digitoxigenin (-1.723271) C14orf169
3197	1.327813	theophylline (1.327813) U47924.30	false	1.327813	theophylline (1.327813) U47924.30
3086	-1.341469	reserpine (-1.341469) U66059.58.1	false	-1.341469	reserpine (-1.341469) U66059.58.1
1641	-1.410645	Prestwick-689 (-1.410645) LL22NC03-2H8.5	false	-1.410645	Prestwick-689 (-1.410645) LL22NC03-2H8.5
1820	1.227275	alfuzosin (1.227275) RP11-1148L6.5.1	false	1.227275	alfuzosin (1.227275) RP11-1148L6.5.1
3754	-1.251063	isoetarine (-1.251063) RP3-522P13.3.1	false	-1.251063	isoetarine (-1.251063) RP3-522P13.3.1
3041	1.444139	mestranol (1.444139) LINC00339	false	1.444139	mestranol (1.444139) LINC00339
5539	1.087199	sulfathiazole (1.087199) MIR22HG	false	1.087199	sulfathiazole (1.087199) MIR22HG
4158	-1.014021	fenoterol (-1.014021) RP11-1148L6.5.1	false	-1.014021	fenoterol (-1.014021) RP11-1148L6.5.1
1450	1.752186	alsterpaullone (1.752186) IDI2-AS1	false	1.752186	alsterpaullone (1.752186) IDI2-AS1
4253	1.103755	terfenadine (1.103755) MIR22HG	false	1.103755	terfenadine (1.103755) MIR22HG
5930	1.977194	pirinixic acid (1.977194) LL22NC03-2H8.5	false	1.977194	pirinixic acid (1.977194) LL22NC03-2H8.5
2010	-1.093831	Prestwick-967 (-1.093831) RP11-286E11.2.1	false	-1.093831	Prestwick-967 (-1.093831) RP11-286E11.2.1
3882	1.446839	strophanthidin (1.446839) MIR22HG	false	1.446839	strophanthidin (1.446839) MIR22HG
1338	1.239547	dilazep (1.239547) RP11-1148L6.5.1	false	1.239547	dilazep (1.239547) RP11-1148L6.5.1
1933	-1.01988	ethionamide (-1.01988) LL22NC03-2H8.5	false	-1.01988	ethionamide (-1.01988) LL22NC03-2H8.5
2600	-1.707548	cloperastine (-1.707548) FGD5-AS1	false	-1.707548	cloperastine (-1.707548) FGD5-AS1
2021	1.260973	Prestwick-967 (1.260973) FGD5-AS1	false	1.260973	Prestwick-967 (1.260973) FGD5-AS1
1803	1.03707	tacrine (1.03707) DLEU2	false	1.03707	tacrine (1.03707) DLEU2
5085	-1.330106	chenodeoxycholic acid (-1.330106) AC005943.5	false	-1.330106	chenodeoxycholic acid (-1.330106) AC005943.5
3428	-1.67876	phenindione (-1.67876) RP11-1148L6.5.1	false	-1.67876	phenindione (-1.67876) RP11-1148L6.5.1
4882	2.065032	32-delta prostaglandin J2 (2.065032) MIR22HG	false	2.065032	32-delta prostaglandin J2 (2.065032) MIR22HG
3105	-1.16632	reserpine (-1.16632) LINC00483	false	-1.16632	reserpine (-1.16632) LINC00483
2081	1.040366	letrozole (1.040366) AD000090.2.1	false	1.040366	letrozole (1.040366) AD000090.2.1
4329	-1.322771	sulfamerazine (-1.322771) AC005546.2	false	-1.322771	sulfamerazine (-1.322771) AC005546.2
5020	-1.008755	L-methionine sulfoximine (-1.008755) IDI2-AS1	false	-1.008755	L-methionine sulfoximine (-1.008755) IDI2-AS1
4541	1.210931	mebhydrolin (1.210931) AD000090.2.1	false	1.210931	mebhydrolin (1.210931) AD000090.2.1
3048	-1.099364	mestranol (-1.099364) LINC00483	false	-1.099364	mestranol (-1.099364) LINC00483
4074	-1.4935235	digoxin (-1.4935235) RP11-473M20.14	false	-1.4935235	digoxin (-1.4935235) RP11-473M20.14
1386	-1.056172	MG-262 (-1.056172) RP11-473M20.14	false	-1.056172	MG-262 (-1.056172) RP11-473M20.14
4819	1.044415	LY-294002 (1.044415) RP11-1376P16.2	false	1.044415	LY-294002 (1.044415) RP11-1376P16.2
4940	-1.644311	19-aminocephalosporanic acid (-1.644311) RP11-612B6.2.1	false	-1.644311	19-aminocephalosporanic acid (-1.644311) RP11-612B6.2.1
3419	-1.258468	scoulerine (-1.258468) LL22NC03-2H8.5	false	-1.258468	scoulerine (-1.258468) LL22NC03-2H8.5
3939	-1.455092	skimmianine (-1.455092) LL22NC03-2H8.5	false	-1.455092	skimmianine (-1.455092) LL22NC03-2H8.5
5939	-1.14612	tanespimycin (-1.14612) CASP8AP2	false	-1.14612	tanespimycin (-1.14612) CASP8AP2
4550	1.122435	mebhydrolin (1.122435) ZNRD1-AS1	false	1.122435	mebhydrolin (1.122435) ZNRD1-AS1
2386	2.12392	spectinomycin (2.12392) FGD5-AS1	false	2.12392	spectinomycin (2.12392) FGD5-AS1
2295	-1.605265	lumicolchicine (-1.605265) EGOT	false	-1.605265	lumicolchicine (-1.605265) EGOT
3204	-1.005297	theophylline (-1.005297) SNHG3	false	-1.005297	theophylline (-1.005297) SNHG3
3830	1.95359	levonorgestrel (1.95359) RP11-612B6.2.1	false	1.95359	levonorgestrel (1.95359) RP11-612B6.2.1
3495	-1.531139	benperidol (-1.531139) RP11-286E11.2.1	false	-1.531139	benperidol (-1.531139) RP11-286E11.2.1
3399	1.042365	molindone (1.042365) MIR22HG	false	1.042365	molindone (1.042365) MIR22HG
5833	1.011188	chlorzoxazone (1.011188) C8orf51	false	1.011188	chlorzoxazone (1.011188) C8orf51
5173	2.971005	chlortetracycline (2.971005) RP11-148G20.1.1	false	2.971005	chlortetracycline (2.971005) RP11-148G20.1.1
3990	-1.074984	puromycin (-1.074984) RP11-574K11.5.1	false	-1.074984	puromycin (-1.074984) RP11-574K11.5.1
3188	-1.175795	procyclidine (-1.175795) RP3-522P13.3.1	false	-1.175795	procyclidine (-1.175795) RP3-522P13.3.1
4046	2.25179975	cephaeline (2.25179975) CROCCP2	false	2.25179975	cephaeline (2.25179975) CROCCP2
5566	1.333014	lobeline (1.333014) CEBPA-AS1	false	1.333014	lobeline (1.333014) CEBPA-AS1
3372	-1.207761	molindone (-1.207761) DGCR11	false	-1.207761	molindone (-1.207761) DGCR11
3929	-1.136278	tetryzoline (-1.136278) C14orf169	false	-1.136278	tetryzoline (-1.136278) C14orf169
4463	-1.12238	sulfaphenazole (-1.12238) AC005943.5	false	-1.12238	sulfaphenazole (-1.12238) AC005943.5
3886	-1.596017	strophanthidin (-1.596017) RP11-574K11.5.1	false	-1.596017	strophanthidin (-1.596017) RP11-574K11.5.1
3686	-1.199458	amrinone (-1.199458) RP3-522P13.3.1	false	-1.199458	amrinone (-1.199458) RP3-522P13.3.1
4024	-1.017601	colecalciferol (-1.017601) RP11-20I23.8.1	false	-1.017601	colecalciferol (-1.017601) RP11-20I23.8.1
5218	-1.200452	azacyclonol (-1.200452) RP11-1376P16.2	false	-1.200452	azacyclonol (-1.200452) RP11-1376P16.2
2171	1.569932	quinisocaine (1.569932) FGD5-AS1	false	1.569932	quinisocaine (1.569932) FGD5-AS1
3775	-1.077994	proadifen (-1.077994) EGOT	false	-1.077994	proadifen (-1.077994) EGOT
5639	1.272582	tubocurarine chloride (1.272582) SMAD5-AS1	false	1.272582	tubocurarine chloride (1.272582) SMAD5-AS1
3726	1.518867	pridinol (1.518867) LL22NC03-2H8.5	false	1.518867	pridinol (1.518867) LL22NC03-2H8.5
5438	1.020952	pyrimethamine (1.020952) KB-1460A1.5.1	false	1.020952	pyrimethamine (1.020952) KB-1460A1.5.1
2344	1.360294	conessine (1.360294) LINC00667	false	1.360294	conessine (1.360294) LINC00667
6008	1.067701	wortmannin (1.067701) LINC00342	false	1.067701	wortmannin (1.067701) LINC00342
5910	-1.100542	geldanamycin (-1.100542) RP11-152N13.16	false	-1.100542	geldanamycin (-1.100542) RP11-152N13.16
2353	-1.120873	conessine (-1.120873) EGOT	false	-1.120873	conessine (-1.120873) EGOT
3455	-1.176654	colistin (-1.176654) RP5-1068E13.3.1	false	-1.176654	colistin (-1.176654) RP5-1068E13.3.1
4080	-1.6359855	digoxin (-1.6359855) C14orf169	false	-1.6359855	digoxin (-1.6359855) C14orf169
2497	-1.32369	sitosterol (-1.32369) AC159540.1.1	false	-1.32369	sitosterol (-1.32369) AC159540.1.1
3873	-1.025756	phenazopyridine (-1.025756) RP11-1148L6.5.1	false	-1.025756	phenazopyridine (-1.025756) RP11-1148L6.5.1
3269	-2.322726	alprostadil (-2.322726) MCM3AP-AS1	false	-2.322726	alprostadil (-2.322726) MCM3AP-AS1
5586	1.147616	ellipticine (1.147616) RP11-667K14.3	false	1.147616	ellipticine (1.147616) RP11-667K14.3
2444	-1.598136	probenecid (-1.598136) EGOT	false	-1.598136	probenecid (-1.598136) EGOT
5603	-1.082885	piperlongumine (-1.082885) MCM3AP-AS1	false	-1.082885	piperlongumine (-1.082885) MCM3AP-AS1
3325	-1.372179	epitiostanol (-1.372179) U66059.58.1	false	-1.372179	epitiostanol (-1.372179) U66059.58.1
4969	-1.139224	trimethylcolchicinic acid (-1.139224) DGCR11	false	-1.139224	trimethylcolchicinic acid (-1.139224) DGCR11
4994	-1.142	trimethylcolchicinic acid (-1.142) PDXDC2P	false	-1.142	trimethylcolchicinic acid (-1.142) PDXDC2P
5088	1.085916	niflumic acid (1.085916) RP11-667K14.3	false	1.085916	niflumic acid (1.085916) RP11-667K14.3
1763	-1.105032	hexetidine (-1.105032) RP11-1148L6.5.1	false	-1.105032	hexetidine (-1.105032) RP11-1148L6.5.1
2525	1.11944	vincamine (1.11944) FGD5-AS1	false	1.11944	vincamine (1.11944) FGD5-AS1
5709	1.039259	trichostatin A (1.039259) AC006042.6.1	false	1.039259	trichostatin A (1.039259) AC006042.6.1
1777	1.363863	cefotiam (1.363863) FGD5-AS1	false	1.363863	cefotiam (1.363863) FGD5-AS1
2611	-1.403335	0175029-0000 (-1.403335) RP11-403P17.4.1	false	-1.403335	0175029-0000 (-1.403335) RP11-403P17.4.1
4493	1.011577	lidocaine (1.011577) RP11-667K14.3	false	1.011577	lidocaine (1.011577) RP11-667K14.3
3637	1.087859	gabapentin (1.087859) RP11-667K14.3	false	1.087859	gabapentin (1.087859) RP11-667K14.3
2400	-1.505762	galantamine (-1.505762) RP11-655M14.13.1	false	-1.505762	galantamine (-1.505762) RP11-655M14.13.1
5883	1.833151	clindamycin (1.833151) AC012065.7.1	false	1.833151	clindamycin (1.833151) AC012065.7.1
2449	-1.300534	probenecid (-1.300534) RP11-74N20.1.1	false	-1.300534	probenecid (-1.300534) RP11-74N20.1.1
1895	1.075919	ofloxacin (1.075919) FAM182A	false	1.075919	ofloxacin (1.075919) FAM182A
5003	1.332626	calcium pantothenate (1.332626) LINC00667	false	1.332626	calcium pantothenate (1.332626) LINC00667
2865	-1.20403	Prestwick-983 (-1.20403) CTD-2562J17.7.1	false	-1.20403	Prestwick-983 (-1.20403) CTD-2562J17.7.1
3783	1.125027	ribostamycin (1.125027) RP11-762H8.1.1	false	1.125027	ribostamycin (1.125027) RP11-762H8.1.1
1358	1.11451	ticarcillin (1.11451) RP11-1148L6.5.1	false	1.11451	ticarcillin (1.11451) RP11-1148L6.5.1
2038	-1.344887	piperine (-1.344887) U66059.58.1	false	-1.344887	piperine (-1.344887) U66059.58.1
2245	2.20627	canavanine (2.20627) LL22NC03-2H8.5	false	2.20627	canavanine (2.20627) LL22NC03-2H8.5
5807	1.258242	glibenclamide (1.258242) RP5-1184F4.5.1	false	1.258242	glibenclamide (1.258242) RP5-1184F4.5.1
2148	-1.181	minoxidil (-1.181) FAM182A	false	-1.181	minoxidil (-1.181) FAM182A
4224	-1.018599	tropicamide (-1.018599) AC005546.2	false	-1.018599	tropicamide (-1.018599) AC005546.2
6032	1.654973	fludrocortisone (1.654973) LL22NC03-2H8.5	false	1.654973	fludrocortisone (1.654973) LL22NC03-2H8.5
2462	-1.629453	probenecid (-1.629453) FAM182A	false	-1.629453	probenecid (-1.629453) FAM182A
3615	1.271642	harmine (1.271642) RP11-499P20.2.1	false	1.271642	harmine (1.271642) RP11-499P20.2.1
1400	1.306011	GW-8510 (1.306011) RP11-394A14.4	false	1.306011	GW-8510 (1.306011) RP11-394A14.4
5653	-1.548877	parthenolide (-1.548877) LINC00341	false	-1.548877	parthenolide (-1.548877) LINC00341
2762	-1.029546	azacitidine (-1.029546) LINC00339	false	-1.029546	azacitidine (-1.029546) LINC00339
5211	1.07653	midecamycin (1.07653) AC006042.6.1	false	1.07653	midecamycin (1.07653) AC006042.6.1
4083	1.602621	digoxin (1.602621) RP11-203B9.4.1	false	1.602621	digoxin (1.602621) RP11-203B9.4.1
3467	-1.147628	orciprenaline (-1.147628) RP11-286E11.2.1	false	-1.147628	orciprenaline (-1.147628) RP11-286E11.2.1
3895	-1.289865	napelline (-1.289865) LL22NC03-2H8.5	false	-1.289865	napelline (-1.289865) LL22NC03-2H8.5
5733	-1.040613667	trichostatin A (-1.040613667) C14orf169	false	-1.040613667	trichostatin A (-1.040613667) C14orf169
4535	-1.076418	mebhydrolin (-1.076418) RP11-286E11.2.1	false	-1.076418	mebhydrolin (-1.076418) RP11-286E11.2.1
3222	-2.200571	nafcillin (-2.200571) RP11-612B6.2.1	false	-2.200571	nafcillin (-2.200571) RP11-612B6.2.1
5049	-1.128325	piromidic acid (-1.128325) RP3-522P13.3.1	false	-1.128325	piromidic acid (-1.128325) RP3-522P13.3.1
5408	1.617878	amprolium (1.617878) RP11-499E18.1.1	false	1.617878	amprolium (1.617878) RP11-499E18.1.1
2428	2.426593	probenecid (2.426593) LL22NC03-2H8.5	false	2.426593	probenecid (2.426593) LL22NC03-2H8.5
4893	-1.241105	21-delta prostaglandin J2 (-1.241105) SNHG3	false	-1.241105	21-delta prostaglandin J2 (-1.241105) SNHG3
4031	-1.002476	bisacodyl (-1.002476) C12orf47	false	-1.002476	bisacodyl (-1.002476) C12orf47
5680	-1.187258	trichostatin A (-1.187258) RP5-1068E13.3.1	false	-1.187258	trichostatin A (-1.187258) RP5-1068E13.3.1
3747	-1.655079	zomepirac (-1.655079) RP11-148B6.1.1	false	-1.655079	zomepirac (-1.655079) RP11-148B6.1.1
5115	-2.08844625	lanatoside C (-2.08844625) AD000090.2.1	false	-2.08844625	lanatoside C (-2.08844625) AD000090.2.1
5715	1.209354	trichostatin A (1.209354) KB-1592A4.15.1	false	1.209354	trichostatin A (1.209354) KB-1592A4.15.1
2629	1.422583	PNU-0251126 (1.422583) RP11-1148L6.5.1	false	1.422583	PNU-0251126 (1.422583) RP11-1148L6.5.1
5497	1.484416	troleandomycin (1.484416) DLEU2	false	1.484416	troleandomycin (1.484416) DLEU2
1610	-1.061981	Prestwick-1083 (-1.061981) RP11-1148L6.5.1	false	-1.061981	Prestwick-1083 (-1.061981) RP11-1148L6.5.1
5346	1.046922	oxetacaine (1.046922) LINC00667	false	1.046922	oxetacaine (1.046922) LINC00667
2947	-1.106694	Prestwick-860 (-1.106694) RP11-403C10.2.1	false	-1.106694	Prestwick-860 (-1.106694) RP11-403C10.2.1
3400	-1.258376	molindone (-1.258376) RP5-1068E13.3.1	false	-1.258376	molindone (-1.258376) RP5-1068E13.3.1
2244	-1.016212	canavanine (-1.016212) DGCR11	false	-1.016212	canavanine (-1.016212) DGCR11
1908	-1.14066	droperidol (-1.14066) RP11-1148L6.5.1	false	-1.14066	droperidol (-1.14066) RP11-1148L6.5.1
5387	-1.27351	idoxuridine (-1.27351) RP11-74N20.1.1	false	-1.27351	idoxuridine (-1.27351) RP11-74N20.1.1
5001	-1.007047	trimethylcolchicinic acid (-1.007047) SEMA3B	false	-1.007047	trimethylcolchicinic acid (-1.007047) SEMA3B
5047	1.02203	caffeic acid (1.02203) RP11-1148L6.5.1	false	1.02203	caffeic acid (1.02203) RP11-1148L6.5.1
3013	-1.015239	chloropyramine (-1.015239) RP11-517A5.4	false	-1.015239	chloropyramine (-1.015239) RP11-517A5.4
4187	1.074419	prilocaine (1.074419) AC012074.2.1	true	1.074419	prilocaine (1.074419) AC012074.2.1
2129	2.571437	corynanthine (2.571437) LL22NC03-2H8.5	false	2.571437	corynanthine (2.571437) LL22NC03-2H8.5
2286	-2.084301	lumicolchicine (-2.084301) RP11-148B6.1.1	false	-2.084301	lumicolchicine (-2.084301) RP11-148B6.1.1
5058	-1.262009	decamethonium bromide (-1.262009) RP11-1148L6.5.1	false	-1.262009	decamethonium bromide (-1.262009) RP11-1148L6.5.1
2923	1.114287	digoxigenin (1.114287) RP11-1148L6.5.1	false	1.114287	digoxigenin (1.114287) RP11-1148L6.5.1
1281	-1.256823	CP-645525-01 (-1.256823) RP11-1148L6.5.1	false	-1.256823	CP-645525-01 (-1.256823) RP11-1148L6.5.1
3020	1.042259	mestranol (1.042259) U47924.30	false	1.042259	mestranol (1.042259) U47924.30
4102	-1.102978	pinacidil (-1.102978) RP11-429B14.4.1	false	-1.102978	pinacidil (-1.102978) RP11-429B14.4.1
3672	-1.040126	bergenin (-1.040126) EGOT	false	-1.040126	bergenin (-1.040126) EGOT
1838	1.439045	imidurea (1.439045) LINC00965	false	1.439045	imidurea (1.439045) LINC00965
4744	1.311382	chlorprothixene (1.311382) RP11-667K14.3	false	1.311382	chlorprothixene (1.311382) RP11-667K14.3
5326	-1.044598	diflunisal (-1.044598) RP11-74N20.1.1	false	-1.044598	diflunisal (-1.044598) RP11-74N20.1.1
5821	-1.147343	nimesulide (-1.147343) RP11-612B6.2.1	false	-1.147343	nimesulide (-1.147343) RP11-612B6.2.1
4306	-1.784512333	helveticoside (-1.784512333) RP11-259N19.1	false	-1.784512333	helveticoside (-1.784512333) RP11-259N19.1
3867	1.103923	metoprolol (1.103923) LINC00483	false	1.103923	metoprolol (1.103923) LINC00483
3420	-1.1465	prenylamine (-1.1465) CASP8AP2	false	-1.1465	prenylamine (-1.1465) CASP8AP2
5308	-1.005154	niclosamide (-1.005154) RP11-574K11.5.1	false	-1.005154	niclosamide (-1.005154) RP11-574K11.5.1
3390	-1.090947	molindone (-1.090947) C9orf31	false	-1.090947	molindone (-1.090947) C9orf31
4570	-1.187708	pepstatin (-1.187708) RP11-566E18.3.1	false	-1.187708	pepstatin (-1.187708) RP11-566E18.3.1
1726	-1.367166	butamben (-1.367166) LL22NC03-2H8.5	false	-1.367166	butamben (-1.367166) LL22NC03-2H8.5
4680	1.120505	anisomycin (1.120505) MT1P3	false	1.120505	anisomycin (1.120505) MT1P3
3811	-1.025524	dicoumarol (-1.025524) AC012074.2.1	false	-1.025524	dicoumarol (-1.025524) AC012074.2.1
2003	2.193573	Prestwick-967 (2.193573) LL22NC03-2H8.5	false	2.193573	Prestwick-967 (2.193573) LL22NC03-2H8.5
2810	-1.189213	mitoxantrone (-1.189213) RP11-203B9.4.1	false	-1.189213	mitoxantrone (-1.189213) RP11-203B9.4.1
3831	1.176393	levonorgestrel (1.176393) RP11-148B6.1.1	false	1.176393	levonorgestrel (1.176393) RP11-148B6.1.1
5516	1.32822	sulfathiazole (1.32822) LINC00667	false	1.32822	sulfathiazole (1.32822) LINC00667
4818	1.255098	LY-294002 (1.255098) RP11-49C24.1.1	false	1.255098	LY-294002 (1.255098) RP11-49C24.1.1
3517	1.221352	betahistine (1.221352) AC012065.7.1	false	1.221352	betahistine (1.221352) AC012065.7.1
2985	1.573469	latamoxef (1.573469) FAM182A	false	1.573469	latamoxef (1.573469) FAM182A
4925	-1.08093	denatonium benzoate (-1.08093) LL22NC03-2H8.5	false	-1.08093	denatonium benzoate (-1.08093) LL22NC03-2H8.5
4709	1.13089	ouabain (1.13089) RP11-680F8.4.1	false	1.13089	ouabain (1.13089) RP11-680F8.4.1
4163	-1.233176	flavoxate (-1.233176) LL22NC03-2H8.5	false	-1.233176	flavoxate (-1.233176) LL22NC03-2H8.5
5673	-1.399964	trichostatin A (-1.399964) DGCR5	false	-1.399964	trichostatin A (-1.399964) DGCR5
3189	1.2040995	procyclidine (1.2040995) ZNRD1-AS1	false	1.2040995	procyclidine (1.2040995) ZNRD1-AS1
1503	1.329003	BAS-012416453 (1.329003) RP11-148G20.1.1	false	1.329003	BAS-012416453 (1.329003) RP11-148G20.1.1
5858	1.65228	ampyrone (1.65228) RP11-655M14.13.1	false	1.65228	ampyrone (1.65228) RP11-655M14.13.1
3489	2.587927	benperidol (2.587927) LL22NC03-2H8.5	false	2.587927	benperidol (2.587927) LL22NC03-2H8.5
3936	-1.171282	ricinine (-1.171282) LL22NC03-2H8.5	false	-1.171282	ricinine (-1.171282) LL22NC03-2H8.5
4602	-1.357473	pepstatin (-1.357473) SEMA3B	false	-1.357473	pepstatin (-1.357473) SEMA3B
4441	-1.093999	heptaminol (-1.093999) AC005943.5	false	-1.093999	heptaminol (-1.093999) AC005943.5
4407	-2.346892	chlorphenamine (-2.346892) RP11-1148L6.5.1	false	-2.346892	chlorphenamine (-2.346892) RP11-1148L6.5.1
3498	-1.00547	benperidol (-1.00547) SNHG3	false	-1.00547	benperidol (-1.00547) SNHG3
4841	1.152597	vorinostat (1.152597) DTX2P1-UPK3BP1-PMS2P11	false	1.152597	vorinostat (1.152597) DTX2P1-UPK3BP1-PMS2P11
5451	-1.310988	pyrimethamine (-1.310988) EGOT	false	-1.310988	pyrimethamine (-1.310988) EGOT
4257	-1.1761490000000001	betonicine (-1.1761490000000001) RP11-517A5.4	false	-1.1761490000000001	betonicine (-1.1761490000000001) RP11-517A5.4
2483	-1.253953	tolmetin (-1.253953) LL22NC03-2H8.5	false	-1.253953	tolmetin (-1.253953) LL22NC03-2H8.5
5494	-1.3134	naphazoline (-1.3134) RP11-148G20.1.1	false	-1.3134	naphazoline (-1.3134) RP11-148G20.1.1
1365	1.0807	CAY-10397 (1.0807) AC012065.7.1	false	1.0807	CAY-10397 (1.0807) AC012065.7.1
3588	-1.034643	hydroxyachillin (-1.034643) MEG3	false	-1.034643	hydroxyachillin (-1.034643) MEG3
2191	-1.50207	isoxsuprine (-1.50207) U66059.58.1	false	-1.50207	isoxsuprine (-1.50207) U66059.58.1
5260	1.366942	chlorhexidine (1.366942) C21orf77	false	1.366942	chlorhexidine (1.366942) C21orf77
4674	1.637045	anisomycin (1.637045) AC091132.1.1	false	1.637045	anisomycin (1.637045) AC091132.1.1
5531	-1.176935	sulfathiazole (-1.176935) RP11-74N20.1.1	false	-1.176935	sulfathiazole (-1.176935) RP11-74N20.1.1
2771	1.032838	amiprilose (1.032838) RP11-148G20.1.1	false	1.032838	amiprilose (1.032838) RP11-148G20.1.1
2789	-1.04309	doxorubicin (-1.04309) LINC00338	false	-1.04309	doxorubicin (-1.04309) LINC00338
5826	-1.080606	chlorzoxazone (-1.080606) RP11-101E13.5	false	-1.080606	chlorzoxazone (-1.080606) RP11-101E13.5
2373	2.055647	spectinomycin (2.055647) CTD-2562J17.7.1	false	2.055647	spectinomycin (2.055647) CTD-2562J17.7.1
5724	1.677515	trichostatin A (1.677515) CTD-2562J17.7.1	false	1.677515	trichostatin A (1.677515) CTD-2562J17.7.1
5291	1.531355	metronidazole (1.531355) AC007319.1.1	false	1.531355	metronidazole (1.531355) AC007319.1.1
5575	-1.563597	lobeline (-1.563597) DLEU2	false	-1.563597	lobeline (-1.563597) DLEU2
5944	-1.3321915	tanespimycin (-1.3321915) RP11-259N19.1	false	-1.3321915	tanespimycin (-1.3321915) RP11-259N19.1
5198	-1.112866	diltiazem (-1.112866) LL22NC03-2H8.5	false	-1.112866	diltiazem (-1.112866) LL22NC03-2H8.5
4827	1.345854333	LY-294002 (1.345854333) RP11-203B9.4.1	false	1.345854333	LY-294002 (1.345854333) RP11-203B9.4.1
1478	-1.279605	scriptaid (-1.279605) RP11-395B7.7.1	false	-1.279605	scriptaid (-1.279605) RP11-395B7.7.1
3915	-1.4883545	hexestrol (-1.4883545) RP11-1148L6.5.1	false	-1.4883545	hexestrol (-1.4883545) RP11-1148L6.5.1
1531	-1.166479	famotidine (-1.166479) LL22NC03-2H8.5	false	-1.166479	famotidine (-1.166479) LL22NC03-2H8.5
5534	1.070394	sulfathiazole (1.070394) RP11-82L18.2.1	false	1.070394	sulfathiazole (1.070394) RP11-82L18.2.1
4869	-1.564260333	vorinostat (-1.564260333) WT1-AS	false	-1.564260333	vorinostat (-1.564260333) WT1-AS
5162	1.026913	paclitaxel (1.026913) AC006042.6.1	false	1.026913	paclitaxel (1.026913) AC006042.6.1
4356	-1.276561	emetine (-1.276561) RP11-286E11.2.1	false	-1.276561	emetine (-1.276561) RP11-286E11.2.1
2157	2.257452	quinisocaine (2.257452) CTD-2562J17.7.1	false	2.257452	quinisocaine (2.257452) CTD-2562J17.7.1
2064	1.695516	cefalonium (1.695516) FGD5-AS1	false	1.695516	cefalonium (1.695516) FGD5-AS1
4564	-1.629563	pepstatin (-1.629563) DGCR11	false	-1.629563	pepstatin (-1.629563) DGCR11
3287	1.219844	sanguinarine (1.219844) KB-1592A4.15.1	false	1.219844	sanguinarine (1.219844) KB-1592A4.15.1
4702	-1.539207	anisomycin (-1.539207) MCM3AP-AS1	false	-1.539207	anisomycin (-1.539207) MCM3AP-AS1
5974	1.2131075	thioridazine (1.2131075) MIR22HG	false	1.2131075	thioridazine (1.2131075) MIR22HG
4651	1.248653	carcinine (1.248653) RP11-403P17.4.1	false	1.248653	carcinine (1.248653) RP11-403P17.4.1
3739	-1.380278	drofenine (-1.380278) EGOT	false	-1.380278	drofenine (-1.380278) EGOT
1797	1.468756	benfluorex (1.468756) RP11-1148L6.5.1	false	1.468756	benfluorex (1.468756) RP11-1148L6.5.1
4104	-1.129513	minocycline (-1.129513) AC005546.2	false	-1.129513	minocycline (-1.129513) AC005546.2
3669	1.080567	bergenin (1.080567) RP11-667K14.3	false	1.080567	bergenin (1.080567) RP11-667K14.3
3141	1.495198	trichlormethiazide (1.495198) AD000090.2.1	false	1.495198	trichlormethiazide (1.495198) AD000090.2.1
1384	-1.3394875	MG-262 (-1.3394875) LINC00094	false	-1.3394875	MG-262 (-1.3394875) LINC00094
4032	1.805262	bisacodyl (1.805262) RP11-203B9.4.1	false	1.805262	bisacodyl (1.805262) RP11-203B9.4.1
4061	2.1554748	cephaeline (2.1554748) RP4-564F22.2.1	false	2.1554748	cephaeline (2.1554748) RP4-564F22.2.1
2241	-1.918757	atovaquone (-1.918757) FAM182A	false	-1.918757	atovaquone (-1.918757) FAM182A
1557	-1.160186	5155877.0 (-1.160186) RP11-1148L6.5.1	false	-1.160186	5155877.0 (-1.160186) RP11-1148L6.5.1
2740	1.035937	eucatropine (1.035937) RP11-395B7.2.1	false	1.035937	eucatropine (1.035937) RP11-395B7.2.1
5458	1.523426	pyrimethamine (1.523426) LINC00339	false	1.523426	pyrimethamine (1.523426) LINC00339
3660	1.482294	butacaine (1.482294) RP11-1148L6.5.1	false	1.482294	butacaine (1.482294) RP11-1148L6.5.1
3061	-1.021632	indoprofen (-1.021632) RP3-522P13.3.1	false	-1.021632	indoprofen (-1.021632) RP3-522P13.3.1
1662	-1.122732	H-7 (-1.122732) RP11-259N19.1	false	-1.122732	H-7 (-1.122732) RP11-259N19.1
2058	-1.696309	cefalonium (-1.696309) U66059.58.1	false	-1.696309	cefalonium (-1.696309) U66059.58.1
5411	-1.388109	amprolium (-1.388109) DGCR5	false	-1.388109	amprolium (-1.388109) DGCR5
4143	1.000678	doxepin (1.000678) RP11-394A14.4	false	1.000678	doxepin (1.000678) RP11-394A14.4
3609	1.295371	harmine (1.295371) RP11-203B9.4.1	false	1.295371	harmine (1.295371) RP11-203B9.4.1
1853	-1.056218	pivampicillin (-1.056218) RP11-612B6.2.1	false	-1.056218	pivampicillin (-1.056218) RP11-612B6.2.1
5133	-1.239011	scopolamine N-oxide (-1.239011) LL22NC03-2H8.5	false	-1.239011	scopolamine N-oxide (-1.239011) LL22NC03-2H8.5
3659	-1.382236	butacaine (-1.382236) RP11-148B6.1.1	false	-1.382236	butacaine (-1.382236) RP11-148B6.1.1
4863	-1.3810385	vorinostat (-1.3810385) LINC00338	false	-1.3810385	vorinostat (-1.3810385) LINC00338
2189	1.534376	isoxsuprine (1.534376) RP11-499E18.1.1	false	1.534376	isoxsuprine (1.534376) RP11-499E18.1.1
4310	-1.966013	helveticoside (-1.966013) LINC00094	false	-1.966013	helveticoside (-1.966013) LINC00094
5952	1.028271	tanespimycin (1.028271) RP11-574K11.5.1	false	1.028271	tanespimycin (1.028271) RP11-574K11.5.1
4131	-1.198404	dyclonine (-1.198404) AC005943.5	false	-1.198404	dyclonine (-1.198404) AC005943.5
3470	-1.497516	orciprenaline (-1.497516) U66059.58.1	false	-1.497516	orciprenaline (-1.497516) U66059.58.1
5213	1.182209	midecamycin (1.182209) ZNRD1-AS1	false	1.182209	midecamycin (1.182209) ZNRD1-AS1
5924	-1.019503	1,5-isoquinolinediol (-1.019503) RP11-394A14.4	false	-1.019503	1,5-isoquinolinediol (-1.019503) RP11-394A14.4
5317	-1.084807	diflunisal (-1.084807) RP1-302G2.5	false	-1.084807	diflunisal (-1.084807) RP1-302G2.5
3380	2.048877	molindone (2.048877) CTD-2562J17.7.1	false	2.048877	molindone (2.048877) CTD-2562J17.7.1
1648	-1.00226	AG-013608 (-1.00226) AC159540.1.1	false	-1.00226	AG-013608 (-1.00226) AC159540.1.1
1366	1.02813	PHA-00846566E (1.02813) RP11-148G20.1.1	false	1.02813	PHA-00846566E (1.02813) RP11-148G20.1.1
4213	-2.489589667	camptothecin (-2.489589667) CTA-204B4.6.1	false	-2.489589667	camptothecin (-2.489589667) CTA-204B4.6.1
4286	1.727695	lycorine (1.727695) MIR22HG	false	1.727695	lycorine (1.727695) MIR22HG
5621	1.759073	ajmaline (1.759073) KCNQ1DN	false	1.759073	ajmaline (1.759073) KCNQ1DN
3782	-1.140486	vidarabine (-1.140486) LINC00483	false	-1.140486	vidarabine (-1.140486) LINC00483
1952	1.054751	piperacillin (1.054751) RP11-667K14.3	false	1.054751	piperacillin (1.054751) RP11-667K14.3
5747	-1.03606	gliclazide (-1.03606) RP11-1148L6.5.1	false	-1.03606	gliclazide (-1.03606) RP11-1148L6.5.1
4749	-1.052014	pentoxyverine (-1.052014) RP11-394A14.4	false	-1.052014	pentoxyverine (-1.052014) RP11-394A14.4
5729	1.170512333	trichostatin A (1.170512333) LINC00312	false	1.170512333	trichostatin A (1.170512333) LINC00312
4931	-1.444597	tonzonium bromide (-1.444597) C14orf169	false	-1.444597	tonzonium bromide (-1.444597) C14orf169
2095	1.467797	seneciphylline (1.467797) RP11-395B7.2.1	false	1.467797	seneciphylline (1.467797) RP11-395B7.2.1
2511	1.035032	trihexyphenidyl (1.035032) RP11-574K11.5.1	false	1.035032	trihexyphenidyl (1.035032) RP11-574K11.5.1
2678	-1.219161	fenbufen (-1.219161) FGD5-AS1	false	-1.219161	fenbufen (-1.219161) FGD5-AS1
5967	1.025334	chlorpromazine (1.025334) RP11-403P17.4.1	false	1.025334	chlorpromazine (1.025334) RP11-403P17.4.1
4875	1.148417	prochlorperazine (1.148417) RP11-667K14.3	false	1.148417	prochlorperazine (1.148417) RP11-667K14.3
1562	-1.073669	Prestwick-972 (-1.073669) LL22NC03-2H8.5	false	-1.073669	Prestwick-972 (-1.073669) LL22NC03-2H8.5
3938	-1.020027	ricinine (-1.020027) DLEU2	false	-1.020027	ricinine (-1.020027) DLEU2
5029	-1.160979	withaferin A (-1.160979) RP11-395B7.2.1	false	-1.160979	withaferin A (-1.160979) RP11-395B7.2.1
5612	-1.300208	syrosingopine (-1.300208) RP11-394A14.4	false	-1.300208	syrosingopine (-1.300208) RP11-394A14.4
4695	-1.63011	anisomycin (-1.63011) CTD-2562J17.7.1	false	-1.63011	anisomycin (-1.63011) CTD-2562J17.7.1
3572	-1.234977	hydroxyachillin (-1.234977) RP1-302G2.5	false	-1.234977	hydroxyachillin (-1.234977) RP1-302G2.5
2225	-1.484458	atovaquone (-1.484458) U66059.58.1	false	-1.484458	atovaquone (-1.484458) U66059.58.1
3427	1.166972	chloroquine (1.166972) RP11-1148L6.5.1	false	1.166972	chloroquine (1.166972) RP11-1148L6.5.1
2115	1.111887	salsolinol (1.111887) AC004447.2	false	1.111887	salsolinol (1.111887) AC004447.2
4932	-1.071142	tonzonium bromide (-1.071142) DLEU2	false	-1.071142	tonzonium bromide (-1.071142) DLEU2
2796	-1.279308	doxorubicin (-1.279308) ZNF518A	false	-1.279308	doxorubicin (-1.279308) ZNF518A
5039	-1.04757	amphotericin B (-1.04757) RP11-667K14.3	false	-1.04757	amphotericin B (-1.04757) RP11-667K14.3
4820	1.2498375	LY-294002 (1.2498375) AC006042.6.1	false	1.2498375	LY-294002 (1.2498375) AC006042.6.1
5869	1.220339	nocodazole (1.220339) KB-1460A1.5.1	false	1.220339	nocodazole (1.220339) KB-1460A1.5.1
5855	1.130963	ampyrone (1.130963) RP11-429B14.4.1	false	1.130963	ampyrone (1.130963) RP11-429B14.4.1
4365	-1.13698	emetine (-1.13698) AC009299.3.1	false	-1.13698	emetine (-1.13698) AC009299.3.1
2716	-1.087365	cycloserine (-1.087365) LL22NC03-2H8.5	false	-1.087365	cycloserine (-1.087365) LL22NC03-2H8.5
1423	-1.38812	thapsigargin (-1.38812) CTD-2562J17.7.1	false	-1.38812	thapsigargin (-1.38812) CTD-2562J17.7.1
5695	1.286938714	trichostatin A (1.286938714) NEAT1	false	1.286938714	trichostatin A (1.286938714) NEAT1
4938	1.679014	21-aminocephalosporanic acid (1.679014) U47924.30	false	1.679014	21-aminocephalosporanic acid (1.679014) U47924.30
1288	-1.384388	IC-86621 (-1.384388) RP11-1148L6.5.1	false	-1.384388	IC-86621 (-1.384388) RP11-1148L6.5.1
1844	1.052617	Prestwick-920 (1.052617) RP11-395B7.2.1	false	1.052617	Prestwick-920 (1.052617) RP11-395B7.2.1
1757	1.614347	budesonide (1.614347) RP11-395B7.2.1	false	1.614347	budesonide (1.614347) RP11-395B7.2.1
5752	1.427726	dirithromycin (1.427726) RP4-802A10.1	false	1.427726	dirithromycin (1.427726) RP4-802A10.1
1409	-1.308124	GW-8510 (-1.308124) BX004987.5.1	false	-1.308124	GW-8510 (-1.308124) BX004987.5.1
2017	-1.072916	Prestwick-967 (-1.072916) EGOT	false	-1.072916	Prestwick-967 (-1.072916) EGOT
4668	-1.024665	carcinine (-1.024665) FAM182A	false	-1.024665	carcinine (-1.024665) FAM182A
3297	1.254989	sanguinarine (1.254989) MIR22HG	false	1.254989	sanguinarine (1.254989) MIR22HG
1947	1.031912	dantrolene (1.031912) FGD5-AS1	false	1.031912	dantrolene (1.031912) FGD5-AS1
4506	-1.007418	digitoxigenin (-1.007418) CECR7	false	-1.007418	digitoxigenin (-1.007418) CECR7
2073	1.111138	letrozole (1.111138) RP11-473M20.14	false	1.111138	letrozole (1.111138) RP11-473M20.14
1802	-1.200155	tacrine (-1.200155) FGD5-AS1	false	-1.200155	tacrine (-1.200155) FGD5-AS1
3602	1.003158	(+)-chelidonine (1.003158) AC005943.5	false	1.003158	(+)-chelidonine (1.003158) AC005943.5
4729	-1.101865	suloctidil (-1.101865) LL22NC03-2H8.5	false	-1.101865	suloctidil (-1.101865) LL22NC03-2H8.5
1816	1.034377	amiodarone (1.034377) AC159540.1.1	false	1.034377	amiodarone (1.034377) AC159540.1.1
4421	4.405127	diprophylline (4.405127) RP5-1184F4.5.1	false	4.405127	diprophylline (4.405127) RP5-1184F4.5.1
2170	1.044397	quinisocaine (1.044397) RP11-203B9.4.1	false	1.044397	quinisocaine (1.044397) RP11-203B9.4.1
2734	-1.030259	flecainide (-1.030259) RP11-403P17.4.1	false	-1.030259	flecainide (-1.030259) RP11-403P17.4.1
3144	-1.231952	trichlormethiazide (-1.231952) RP11-74N20.1.1	false	-1.231952	trichlormethiazide (-1.231952) RP11-74N20.1.1
5802	1.046834	glibenclamide (1.046834) LA16c-381G6.1.1	false	1.046834	glibenclamide (1.046834) LA16c-381G6.1.1
2300	1.18789	lumicolchicine (1.18789) DLEU2	false	1.18789	lumicolchicine (1.18789) DLEU2
4611	1.32788	apigenin (1.32788) RP11-667K14.3	false	1.32788	apigenin (1.32788) RP11-667K14.3
1916	-1.116007	iopromide (-1.116007) LL22NC03-2H8.5	false	-1.116007	iopromide (-1.116007) LL22NC03-2H8.5
2196	-1.835883	isoxsuprine (-1.835883) RP3-522P13.3.1	false	-1.835883	isoxsuprine (-1.835883) RP3-522P13.3.1
2852	1.183588	bupropion (1.183588) RP11-403P17.4.1	false	1.183588	bupropion (1.183588) RP11-403P17.4.1
6029	-1.087592	staurosporine (-1.087592) MIR22HG	false	-1.087592	staurosporine (-1.087592) MIR22HG
4665	1.29713	carcinine (1.29713) FGD5-AS1	false	1.29713	carcinine (1.29713) FGD5-AS1
5521	-1.902573	sulfathiazole (-1.902573) RP11-148B6.1.1	false	-1.902573	sulfathiazole (-1.902573) RP11-148B6.1.1
2558	-1.123365	phenelzine (-1.123365) RP11-612B6.2.1	false	-1.123365	phenelzine (-1.123365) RP11-612B6.2.1
4876	-1.0773835	prochlorperazine (-1.0773835) WT1-AS	false	-1.0773835	prochlorperazine (-1.0773835) WT1-AS
2975	-1.272811	latamoxef (-1.272811) RP11-1148L6.5.1	false	-1.272811	latamoxef (-1.272811) RP11-1148L6.5.1
2266	1.450902	canavanine (1.450902) FGD5-AS1	false	1.450902	canavanine (1.450902) FGD5-AS1
2143	1.022237	corynanthine (1.022237) CROCCP2	false	1.022237	corynanthine (1.022237) CROCCP2
3587	1.119298	hydroxyachillin (1.119298) LINC00339	false	1.119298	hydroxyachillin (1.119298) LINC00339
4605	1.075288	cefadroxil (1.075288) AC012074.2.1	false	1.075288	cefadroxil (1.075288) AC012074.2.1
3095	1.017968	reserpine (1.017968) DLEU2	false	1.017968	reserpine (1.017968) DLEU2
4122	-1.639491	enalapril (-1.639491) AC005943.5	false	-1.639491	enalapril (-1.639491) AC005943.5
5477	-1.252654	doxylamine (-1.252654) RP3-522P13.3.1	false	-1.252654	doxylamine (-1.252654) RP3-522P13.3.1
2706	-1.832218	kaempferol (-1.832218) RP11-403C10.2.1	false	-1.832218	kaempferol (-1.832218) RP11-403C10.2.1
2421	1.082867	galantamine (1.082867) MIR22HG	false	1.082867	galantamine (1.082867) MIR22HG
5290	1.392593	metronidazole (1.392593) RP11-74N20.1.1	false	1.392593	metronidazole (1.392593) RP11-74N20.1.1
4722	-1.4142	ouabain (-1.4142) RP11-403C10.2.1	false	-1.4142	ouabain (-1.4142) RP11-403C10.2.1
3976	-1.061692	thiostrepton (-1.061692) TUG1	false	-1.061692	thiostrepton (-1.061692) TUG1
5556	-1.471892	racecadotril (-1.471892) AC159540.1.1	false	-1.471892	racecadotril (-1.471892) AC159540.1.1
3622	1.029553	pyrithyldione (1.029553) RP11-612B6.2.1	false	1.029553	pyrithyldione (1.029553) RP11-612B6.2.1
5590	-1.5872745	ellipticine (-1.5872745) AD000090.2.1	false	-1.5872745	ellipticine (-1.5872745) AD000090.2.1
4889	-1.434159	25-delta prostaglandin J2 (-1.434159) RP11-394A14.4	false	-1.434159	25-delta prostaglandin J2 (-1.434159) RP11-394A14.4
2873	1.727606	chrysin (1.727606) KB-1460A1.5.1	false	1.727606	chrysin (1.727606) KB-1460A1.5.1
5987	1.069569	valproic acid (1.069569) ZNRD1-AS1	false	1.069569	valproic acid (1.069569) ZNRD1-AS1
3965	-1.018263	nifuroxazide (-1.018263) FAM182A	false	-1.018263	nifuroxazide (-1.018263) FAM182A
2022	1.06767	Prestwick-967 (1.06767) ZNRD1-AS1	false	1.06767	Prestwick-967 (1.06767) ZNRD1-AS1
2630	-1.047022	Prestwick-665 (-1.047022) DLEU2	false	-1.047022	Prestwick-665 (-1.047022) DLEU2
4645	1.103386	SR-95531 (1.103386) CROCCP2	false	1.103386	SR-95531 (1.103386) CROCCP2
5761	1.285346	methylergometrine (1.285346) RP11-612B6.2.1	false	1.285346	methylergometrine (1.285346) RP11-612B6.2.1
3629	1.126019	methazolamide (1.126019) AC005546.2	false	1.126019	methazolamide (1.126019) AC005546.2
2583	-1.102993	spiradoline (-1.102993) LL22NC03-2H8.5	false	-1.102993	spiradoline (-1.102993) LL22NC03-2H8.5
5835	1.250181	chlorzoxazone (1.250181) RP5-1184F4.5.1	false	1.250181	chlorzoxazone (1.250181) RP5-1184F4.5.1
2845	-1.012751	fendiline (-1.012751) DLEU2	false	-1.012751	fendiline (-1.012751) DLEU2
5124	-1.065656	mepenzolate bromide (-1.065656) FAM182A	false	-1.065656	mepenzolate bromide (-1.065656) FAM182A
4832	-1.002417	LY-294002 (-1.002417) LINC00483	false	-1.002417	LY-294002 (-1.002417) LINC00483
1712	-1.09964	dexpropranolol (-1.09964) LL22NC03-2H8.5	false	-1.09964	dexpropranolol (-1.09964) LL22NC03-2H8.5
5250	-1.141905	oxybuprocaine (-1.141905) RP11-395B7.2.1	false	-1.141905	oxybuprocaine (-1.141905) RP11-395B7.2.1
5933	1.0445	TTNPB (1.0445) LL22NC03-2H8.5	false	1.0445	TTNPB (1.0445) LL22NC03-2H8.5
2622	-2.809949	0175029-0000 (-2.809949) C14orf169	false	-2.809949	0175029-0000 (-2.809949) C14orf169
5882	3.031172	clindamycin (3.031172) RP11-517A5.4	false	3.031172	clindamycin (3.031172) RP11-517A5.4
2350	-1.041384	conessine (-1.041384) U66059.58.1	false	-1.041384	conessine (-1.041384) U66059.58.1
5429	1.194262	miconazole (1.194262) AC006042.6.1	false	1.194262	miconazole (1.194262) AC006042.6.1
4033	-1.123773333	bisacodyl (-1.123773333) LINC00094	false	-1.123773333	bisacodyl (-1.123773333) LINC00094
3357	-1.621527667	proscillaridin (-1.621527667) LINC00094	false	-1.621527667	proscillaridin (-1.621527667) LINC00094
5253	1.428015	chlorhexidine (1.428015) RP11-429B14.4.1	false	1.428015	chlorhexidine (1.428015) RP11-429B14.4.1
2725	-1.225363	netilmicin (-1.225363) LL22NC03-2H8.5	false	-1.225363	netilmicin (-1.225363) LL22NC03-2H8.5
2651	1.319896	0179445-0000 (1.319896) AC159540.1.1	false	1.319896	0179445-0000 (1.319896) AC159540.1.1
6011	-1.039897	wortmannin (-1.039897) LL22NC03-2H8.5	false	-1.039897	wortmannin (-1.039897) LL22NC03-2H8.5
2712	1.383376	(-)-isoprenaline (1.383376) RP11-403C10.2.1	false	1.383376	(-)-isoprenaline (1.383376) RP11-403C10.2.1
3706	-1.428058	cinoxacin (-1.428058) RP11-612B6.2.1	false	-1.428058	cinoxacin (-1.428058) RP11-612B6.2.1
3719	-1.22707	ebselen (-1.22707) RP11-148B6.1.1	false	-1.22707	ebselen (-1.22707) RP11-148B6.1.1
4427	-1.160284	todralazine (-1.160284) RP11-1148L6.5.1	false	-1.160284	todralazine (-1.160284) RP11-1148L6.5.1
5875	-1.033421	dizocilpine (-1.033421) CECR7	false	-1.033421	dizocilpine (-1.033421) CECR7
3900	1.072851	napelline (1.072851) LINC00483	false	1.072851	napelline (1.072851) LINC00483
2980	-1.33353	latamoxef (-1.33353) RP4-564F22.2.1	false	-1.33353	latamoxef (-1.33353) RP4-564F22.2.1
5988	-1.2084405	valproic acid (-1.2084405) FAM182A	false	-1.2084405	valproic acid (-1.2084405) FAM182A
1375	-2.725685	MS-275 (-2.725685) RP11-1148L6.5.1	false	-2.725685	MS-275 (-2.725685) RP11-1148L6.5.1
1337	1.20582	fludroxycortide (1.20582) RP11-1148L6.5.1	false	1.20582	fludroxycortide (1.20582) RP11-1148L6.5.1
5181	2.88576	danazol (2.88576) RP11-517A5.4	false	2.88576	danazol (2.88576) RP11-517A5.4
5210	-1.220123	midecamycin (-1.220123) DLEU2	false	-1.220123	midecamycin (-1.220123) DLEU2
5511	1.082918	cimetidine (1.082918) KIR3DP1	false	1.082918	cimetidine (1.082918) KIR3DP1
2545	1.105699	ethotoin (1.105699) RP11-612B6.2.1	false	1.105699	ethotoin (1.105699) RP11-612B6.2.1
2753	-1.318668	profenamine (-1.318668) RP11-1148L6.5.1	false	-1.318668	profenamine (-1.318668) RP11-1148L6.5.1
4742	-1.066711	chlorprothixene (-1.066711) CASP8AP2	false	-1.066711	chlorprothixene (-1.066711) CASP8AP2
1684	1.241217	H-7 (1.241217) MT1P3	false	1.241217	H-7 (1.241217) MT1P3
5268	1.279755	khellin (1.279755) RP11-1148L6.5.1	false	1.279755	khellin (1.279755) RP11-1148L6.5.1
1741	1.768596	spiperone (1.768596) MIR22HG	false	1.768596	spiperone (1.768596) MIR22HG
4385	-1.383669	emetine (-1.383669) LINC00342	false	-1.383669	emetine (-1.383669) LINC00342
4813	-1.181573	fulvestrant (-1.181573) LINC00483	false	-1.181573	fulvestrant (-1.181573) LINC00483
4918	1.181354	propidium iodide (1.181354) AC012065.7.1	false	1.181354	propidium iodide (1.181354) AC012065.7.1
3123	-1.186086	simvastatin (-1.186086) LINC00483	false	-1.186086	simvastatin (-1.186086) LINC00483
4595	1.446102	pepstatin (1.446102) ZNRD1-AS1	false	1.446102	pepstatin (1.446102) ZNRD1-AS1
5796	-1.121864	clotrimazole (-1.121864) CASP8AP2	false	-1.121864	clotrimazole (-1.121864) CASP8AP2
1416	-2.781084	GW-8510 (-2.781084) CASP8AP2	false	-2.781084	GW-8510 (-2.781084) CASP8AP2
1414	-1.226169	GW-8510 (-1.226169) C11orf95	false	-1.226169	GW-8510 (-1.226169) C11orf95
3753	1.253109	isoetarine (1.253109) ZBTB20-AS2	false	1.253109	isoetarine (1.253109) ZBTB20-AS2
2688	-1.069186	fenoprofen (-1.069186) DLEU2	false	-1.069186	fenoprofen (-1.069186) DLEU2
3816	-1.09844	flunixin (-1.09844) FAM182A	false	-1.09844	flunixin (-1.09844) FAM182A
4989	-1.527153	trimethylcolchicinic acid (-1.527153) AC009299.3.1	false	-1.527153	trimethylcolchicinic acid (-1.527153) AC009299.3.1
5660	1.239547	trichostatin A (1.239547) RP11-680F8.4.1	false	1.239547	trichostatin A (1.239547) RP11-680F8.4.1
2002	-1.044976	phenazone (-1.044976) LINC00483	false	-1.044976	phenazone (-1.044976) LINC00483
2998	-1.129581	Prestwick-857 (-1.129581) RP3-522P13.3.1	false	-1.129581	Prestwick-857 (-1.129581) RP3-522P13.3.1
2653	-1.066756	0179445-0000 (-1.066756) RP11-152N13.16	false	-1.066756	0179445-0000 (-1.066756) RP11-152N13.16
4250	-1.00956	methocarbamol (-1.00956) RP11-667K14.3	false	-1.00956	methocarbamol (-1.00956) RP11-667K14.3
5335	-1.18366	diflunisal (-1.18366) RP11-148G20.1.1	false	-1.18366	diflunisal (-1.18366) RP11-148G20.1.1
2011	-1.105465	Prestwick-967 (-1.105465) RP11-148B6.1.1	false	-1.105465	Prestwick-967 (-1.105465) RP11-148B6.1.1
1698	1.28006	leflunomide (1.28006) RP11-1148L6.5.1	false	1.28006	leflunomide (1.28006) RP11-1148L6.5.1
3288	-1.3664465	sanguinarine (-1.3664465) RP11-101E13.5	false	-1.3664465	sanguinarine (-1.3664465) RP11-101E13.5
4116	-1.526053	fenofibrate (-1.526053) AC005943.5	false	-1.526053	fenofibrate (-1.526053) AC005943.5
5646	-1.241819	parthenolide (-1.241819) RP11-152N13.16	false	-1.241819	parthenolide (-1.241819) RP11-152N13.16
2502	1.072479	cinchocaine (1.072479) RP11-499P20.2.1	false	1.072479	cinchocaine (1.072479) RP11-499P20.2.1
2272	-1.225479	canavanine (-1.225479) LINC00483	false	-1.225479	canavanine (-1.225479) LINC00483
3651	-1.041327	securinine (-1.041327) LINC00342	false	-1.041327	securinine (-1.041327) LINC00342
4097	-1.456296	disopyramide (-1.456296) AC005943.5	false	-1.456296	disopyramide (-1.456296) AC005943.5
4743	1.107672	chlorprothixene (1.107672) MIR22HG	false	1.107672	chlorprothixene (1.107672) MIR22HG
3916	-1.108175	delsoline (-1.108175) LL22NC03-2H8.5	false	-1.108175	delsoline (-1.108175) LL22NC03-2H8.5
1316	1.033924	irinotecan (1.033924) RP11-203B9.4.1	false	1.033924	irinotecan (1.033924) RP11-203B9.4.1
4371	-1.000694	emetine (-1.000694) LINC00483	false	-1.000694	emetine (-1.000694) LINC00483
1909	-1.0914	kanamycin (-1.0914) RP11-1148L6.5.1	false	-1.0914	kanamycin (-1.0914) RP11-1148L6.5.1
2259	1.379818	canavanine (1.379818) AD000090.2.1	false	1.379818	canavanine (1.379818) AD000090.2.1
1430	1.391698	thapsigargin (1.391698) AC006042.6.1	false	1.391698	thapsigargin (1.391698) AC006042.6.1
3508	-1.185928	benperidol (-1.185928) AC009299.3.1	false	-1.185928	benperidol (-1.185928) AC009299.3.1
2269	1.113559	canavanine (1.113559) KIR3DP1	false	1.113559	canavanine (1.113559) KIR3DP1
2490	-1.235763	propylthiouracil (-1.235763) LL22NC03-2H8.5	false	-1.235763	propylthiouracil (-1.235763) LL22NC03-2H8.5
4513	1.298538667	digitoxigenin (1.298538667) AC091132.1.1	false	1.298538667	digitoxigenin (1.298538667) AC091132.1.1
4500	-1.237905	primaquine (-1.237905) RP11-473M20.14	false	-1.237905	primaquine (-1.237905) RP11-473M20.14
5484	-1.053797	levodopa (-1.053797) RP4-669P10.16.1	false	-1.053797	levodopa (-1.053797) RP4-669P10.16.1
2954	1.254697	sulconazole (1.254697) RP11-667K14.3	false	1.254697	sulconazole (1.254697) RP11-667K14.3
4911	-1.059172	glycocholic acid (-1.059172) FGD5-AS1	false	-1.059172	glycocholic acid (-1.059172) FGD5-AS1
3351	-1.551477	proscillaridin (-1.551477) C12orf47	false	-1.551477	proscillaridin (-1.551477) C12orf47
5595	-1.228243667	ellipticine (-1.228243667) CASP8AP2	false	-1.228243667	ellipticine (-1.228243667) CASP8AP2
1328	1.459813	semustine (1.459813) RP11-1148L6.5.1	false	1.459813	semustine (1.459813) RP11-1148L6.5.1
3162	1.406317	fosfosal (1.406317) LINC00667	false	1.406317	fosfosal (1.406317) LINC00667
4222	-1.123156	tropicamide (-1.123156) RP5-1184F4.5.1	false	-1.123156	tropicamide (-1.123156) RP5-1184F4.5.1
1655	-1.010694	H-7 (-1.010694) PLK1S1	false	-1.010694	H-7 (-1.010694) PLK1S1
5059	-1.295944	decamethonium bromide (-1.295944) RP11-395B7.2.1	false	-1.295944	decamethonium bromide (-1.295944) RP11-395B7.2.1
6001	1.289745714	tretinoin (1.289745714) CTD-2562J17.7.1	false	1.289745714	tretinoin (1.289745714) CTD-2562J17.7.1
3329	1.010137	epitiostanol (1.010137) AD000090.2.1	false	1.010137	epitiostanol (1.010137) AD000090.2.1
5697	-1.032635	trichostatin A (-1.032635) BX004987.5.1	false	-1.032635	trichostatin A (-1.032635) BX004987.5.1
1599	-1.376348	STOCK1N-35215 (-1.376348) RP11-473M20.14	false	-1.376348	STOCK1N-35215 (-1.376348) RP11-473M20.14
2322	-1.290252	naftopidil (-1.290252) U66059.58.1	false	-1.290252	naftopidil (-1.290252) U66059.58.1
1924	-1.467087	clomipramine (-1.467087) CASP8AP2	false	-1.467087	clomipramine (-1.467087) CASP8AP2
1811	1.214394	testosterone (1.214394) RP11-1148L6.5.1	false	1.214394	testosterone (1.214394) RP11-1148L6.5.1
2142	1.285293	corynanthine (1.285293) FGD5-AS1	false	1.285293	corynanthine (1.285293) FGD5-AS1
4896	-1.514139	19-delta prostaglandin J2 (-1.514139) WT1-AS	false	-1.514139	19-delta prostaglandin J2 (-1.514139) WT1-AS
4625	1.165462	SR-95531 (1.165462) RP11-403P17.4.1	false	1.165462	SR-95531 (1.165462) RP11-403P17.4.1
2597	-1.063569	spiramycin (-1.063569) RP11-566E18.3.1	false	-1.063569	spiramycin (-1.063569) RP11-566E18.3.1
2031	1.077609	piperine (1.077609) U47924.30	false	1.077609	piperine (1.077609) U47924.30
1356	-1.074782	isoniazid (-1.074782) AC012074.2.1	false	-1.074782	isoniazid (-1.074782) AC012074.2.1
5096	1.199858	lanatoside C (1.199858) NEAT1	false	1.199858	lanatoside C (1.199858) NEAT1
5076	1.005461	pipenzolate bromide (1.005461) LINC00667	false	1.005461	pipenzolate bromide (1.005461) LINC00667
2086	1.332909	letrozole (1.332909) ZNRD1-AS1	false	1.332909	letrozole (1.332909) ZNRD1-AS1
3531	-1.056349	norcyclobenzaprine (-1.056349) RP5-1068E13.3.1	false	-1.056349	norcyclobenzaprine (-1.056349) RP5-1068E13.3.1
3678	1.099339	carbinoxamine (1.099339) RP11-148G20.1.1	false	1.099339	carbinoxamine (1.099339) RP11-148G20.1.1
1783	-1.1392355	idazoxan (-1.1392355) RP11-612B6.2.1	false	-1.1392355	idazoxan (-1.1392355) RP11-612B6.2.1
3461	1.389773	orciprenaline (1.389773) RP11-403P17.4.1	false	1.389773	orciprenaline (1.389773) RP11-403P17.4.1
5299	-1.008499	trimethobenzamide (-1.008499) LL22NC03-2H8.5	false	-1.008499	trimethobenzamide (-1.008499) LL22NC03-2H8.5
1790	-1.288098	rolipram (-1.288098) RP11-1148L6.5.1	false	-1.288098	rolipram (-1.288098) RP11-1148L6.5.1
3481	-1.134438	orciprenaline (-1.134438) RP11-1148L6.5.1	false	-1.134438	orciprenaline (-1.134438) RP11-1148L6.5.1
1475	2.592307	scriptaid (2.592307) RP11-655M14.13.1	false	2.592307	scriptaid (2.592307) RP11-655M14.13.1
5897	-1.316979	resveratrol (-1.316979) RP11-612B6.2.1	false	-1.316979	resveratrol (-1.316979) RP11-612B6.2.1
1670	-1.127318	H-7 (-1.127318) RP11-473M20.14	false	-1.127318	H-7 (-1.127318) RP11-473M20.14
2401	2.124073	galantamine (2.124073) CTD-2562J17.7.1	false	2.124073	galantamine (2.124073) CTD-2562J17.7.1
3538	1.079852	cetirizine (1.079852) RP11-667K14.3	false	1.079852	cetirizine (1.079852) RP11-667K14.3
2572	1.032175	mexiletine (1.032175) RP11-667K14.3	false	1.032175	mexiletine (1.032175) RP11-667K14.3
5817	1.119326	aztreonam (1.119326) KIR3DP1	false	1.119326	aztreonam (1.119326) KIR3DP1
4499	-1.002125	primaquine (-1.002125) AC005546.2	false	-1.002125	primaquine (-1.002125) AC005546.2
4166	1.094139	ifenprodil (1.094139) AC005546.2	false	1.094139	ifenprodil (1.094139) AC005546.2
2267	1.068798	canavanine (1.068798) RP11-82L18.2.1	false	1.068798	canavanine (1.068798) RP11-82L18.2.1
3334	-1.212863	epitiostanol (-1.212863) AC009299.3.1	false	-1.212863	epitiostanol (-1.212863) AC009299.3.1
4874	1.130514	prochlorperazine (1.130514) PLK1S1	false	1.130514	prochlorperazine (1.130514) PLK1S1
4004	1.003458	ceforanide (1.003458) RP11-203B9.4.1	false	1.003458	ceforanide (1.003458) RP11-203B9.4.1
2686	-1.504256	Prestwick-664 (-1.504256) RP11-517A5.4	false	-1.504256	Prestwick-664 (-1.504256) RP11-517A5.4
4687	1.328688	anisomycin (1.328688) RP11-492E3.1.1	false	1.328688	anisomycin (1.328688) RP11-492E3.1.1
5565	2.093431	lobeline (2.093431) RP4-802A10.1	false	2.093431	lobeline (2.093431) RP4-802A10.1
3362	-1.869461333	proscillaridin (-1.869461333) MCM3AP-AS1	false	-1.869461333	proscillaridin (-1.869461333) MCM3AP-AS1
3725	-1.226256	hecogenin (-1.226256) LINC00483	false	-1.226256	hecogenin (-1.226256) LINC00483
3343	1.186848	epitiostanol (1.186848) RP11-148G20.1.1	false	1.186848	epitiostanol (1.186848) RP11-148G20.1.1
1925	-1.004357	riboflavin (-1.004357) LL22NC03-2H8.5	false	-1.004357	riboflavin (-1.004357) LL22NC03-2H8.5
3371	-1.4993	sotalol (-1.4993) LL22NC03-2H8.5	false	-1.4993	sotalol (-1.4993) LL22NC03-2H8.5
2925	-1.42401	digoxigenin (-1.42401) LINC00339	false	-1.42401	digoxigenin (-1.42401) LINC00339
2705	1.055024	kaempferol (1.055024) KB-1460A1.5.1	false	1.055024	kaempferol (1.055024) KB-1460A1.5.1
5402	2.82095	amprolium (2.82095) LL22NC03-2H8.5	false	2.82095	amprolium (2.82095) LL22NC03-2H8.5
3968	1.028855	tolazamide (1.028855) LL22NC03-2H8.5	false	1.028855	tolazamide (1.028855) LL22NC03-2H8.5
4688	2.001763333	anisomycin (2.001763333) RP4-564F22.2.1	false	2.001763333	anisomycin (2.001763333) RP4-564F22.2.1
2074	-1.66485	letrozole (-1.66485) RP11-612B6.2.1	false	-1.66485	letrozole (-1.66485) RP11-612B6.2.1
1647	1.610303	AG-013608 (1.610303) CECR7	false	1.610303	AG-013608 (1.610303) CECR7
3777	1.203092	proadifen (1.203092) RP11-1148L6.5.1	false	1.203092	proadifen (1.203092) RP11-1148L6.5.1
3211	-1.102079	theophylline (-1.102079) AC012074.2.1	false	-1.102079	theophylline (-1.102079) AC012074.2.1
2617	-1.140562	0175029-0000 (-1.140562) ZNF518A	false	-1.140562	0175029-0000 (-1.140562) ZNF518A
2120	-1.233335	salsolinol (-1.233335) RP11-612B6.2.1	false	-1.233335	salsolinol (-1.233335) RP11-612B6.2.1
5199	1.164247	diltiazem (1.164247) RP11-612B6.2.1	false	1.164247	diltiazem (1.164247) RP11-612B6.2.1
4305	-1.1018915	helveticoside (-1.1018915) PLK1S1	false	-1.1018915	helveticoside (-1.1018915) PLK1S1
2161	-1.630881	quinisocaine (-1.630881) U66059.58.1	false	-1.630881	quinisocaine (-1.630881) U66059.58.1
5112	-1.005005	lanatoside C (-1.005005) LL22NC03-2H8.5	false	-1.005005	lanatoside C (-1.005005) LL22NC03-2H8.5
4096	-1.166757	bumetanide (-1.166757) AC005943.5	false	-1.166757	bumetanide (-1.166757) AC005943.5
3021	-1.043415	mestranol (-1.043415) RP11-348N5.7	false	-1.043415	mestranol (-1.043415) RP11-348N5.7
2197	-1.077404	isoxsuprine (-1.077404) LINC00342	false	-1.077404	isoxsuprine (-1.077404) LINC00342
5576	1.72886	lobeline (1.72886) RP11-148G20.1.1	false	1.72886	lobeline (1.72886) RP11-148G20.1.1
5774	-1.012649	colchicine (-1.012649) LL22NC03-2H8.5	false	-1.012649	colchicine (-1.012649) LL22NC03-2H8.5
5677	-1.192282	trichostatin A (-1.192282) RP11-74N20.1.1	false	-1.192282	trichostatin A (-1.192282) RP11-74N20.1.1
3844	-1.09076	meclofenoxate (-1.09076) DLEU2	false	-1.09076	meclofenoxate (-1.09076) DLEU2
2482	-1.076043	tolmetin (-1.076043) AC012065.7.1	false	-1.076043	tolmetin (-1.076043) AC012065.7.1
1980	1.341799	cyclobenzaprine (1.341799) LINC00667	false	1.341799	cyclobenzaprine (1.341799) LINC00667
4967	-1.09873	propantheline bromide (-1.09873) AC009299.3.1	false	-1.09873	propantheline bromide (-1.09873) AC009299.3.1
3296	-1.14364	sanguinarine (-1.14364) MCM3AP-AS1	false	-1.14364	sanguinarine (-1.14364) MCM3AP-AS1
4206	-1.131214	camptothecin (-1.131214) KB-431C1.4.1	false	-1.131214	camptothecin (-1.131214) KB-431C1.4.1
1880	1.1138325	palmatine (1.1138325) RP11-395B7.2.1	false	1.1138325	palmatine (1.1138325) RP11-395B7.2.1
1685	-3.49378425	H-7 (-3.49378425) CASP8AP2	false	-3.49378425	H-7 (-3.49378425) CASP8AP2
5585	-1.129312	ellipticine (-1.129312) RP11-152N13.16	false	-1.129312	ellipticine (-1.129312) RP11-152N13.16
5373	2.271786	idoxuridine (2.271786) CTD-2562J17.7.1	false	2.271786	idoxuridine (2.271786) CTD-2562J17.7.1
2276	2.832899	lumicolchicine (2.832899) LL22NC03-2H8.5	false	2.832899	lumicolchicine (2.832899) LL22NC03-2H8.5
6035	-1.045027	fludrocortisone (-1.045027) RP11-394A14.4	false	-1.045027	fludrocortisone (-1.045027) RP11-394A14.4
2897	1.266	cantharidin (1.266) KB-1592A4.15.1	false	1.266	cantharidin (1.266) KB-1592A4.15.1
2429	-1.044639	probenecid (-1.044639) RP11-348N5.7	false	-1.044639	probenecid (-1.044639) RP11-348N5.7
4167	1.054165	ifenprodil (1.054165) RP11-612B6.2.1	false	1.054165	ifenprodil (1.054165) RP11-612B6.2.1
2911	-1.200249	digoxigenin (-1.200249) C12orf47	false	-1.200249	digoxigenin (-1.200249) C12orf47
2308	1.183652	lumicolchicine (1.183652) MIR22HG	false	1.183652	lumicolchicine (1.183652) MIR22HG
5622	-1.63994	ajmaline (-1.63994) DLEU2	false	-1.63994	ajmaline (-1.63994) DLEU2
3429	-1.183416	phenindione (-1.183416) LL22NC03-2H8.5	false	-1.183416	phenindione (-1.183416) LL22NC03-2H8.5
3125	-1.210078	simvastatin (-1.210078) RP3-522P13.3.1	false	-1.210078	simvastatin (-1.210078) RP3-522P13.3.1
2294	1.550814	lumicolchicine (1.550814) AD000090.2.1	false	1.550814	lumicolchicine (1.550814) AD000090.2.1
5177	-1.046072	danazol (-1.046072) RP11-1376P16.2	false	-1.046072	danazol (-1.046072) RP11-1376P16.2
4716	-2.370687	ouabain (-2.370687) MCM3AP-AS1	false	-2.370687	ouabain (-2.370687) MCM3AP-AS1
4276	-1.374944	lycorine (-1.374944) SNHG3	false	-1.374944	lycorine (-1.374944) SNHG3
3795	-1.056564	alexidine (-1.056564) MAP3K14	false	-1.056564	alexidine (-1.056564) MAP3K14
2067	-1.173307	cefalonium (-1.173307) LINC00483	false	-1.173307	cefalonium (-1.173307) LINC00483
2894	-4.318894	cantharidin (-4.318894) LINC00342	false	-4.318894	cantharidin (-4.318894) LINC00342
5825	1.139083	chlorzoxazone (1.139083) RP11-72I8.1.1	false	1.139083	chlorzoxazone (1.139083) RP11-72I8.1.1
2783	1.029326	doxorubicin (1.029326) RP11-20I23.8.1	false	1.029326	doxorubicin (1.029326) RP11-20I23.8.1
2580	1.001057	ethoxyquin (1.001057) LL22NC03-2H8.5	false	1.001057	ethoxyquin (1.001057) LL22NC03-2H8.5
4088	-1.335886	acemetacin (-1.335886) AC005943.5	false	-1.335886	acemetacin (-1.335886) AC005943.5
4952	1.108824	7-aminocephalosporanic acid (1.108824) RP11-403P17.4.1	false	1.108824	7-aminocephalosporanic acid (1.108824) RP11-403P17.4.1
1540	-1.282126	PHA-00767505E (-1.282126) RP11-1148L6.5.1	false	-1.282126	PHA-00767505E (-1.282126) RP11-1148L6.5.1
5918	-1.067641	fisetin (-1.067641) CTA-204B4.6.1	false	-1.067641	fisetin (-1.067641) CTA-204B4.6.1
3391	-1.387207	molindone (-1.387207) RP3-522P13.3.1	false	-1.387207	molindone (-1.387207) RP3-522P13.3.1
2438	1.088901	probenecid (1.088901) CTC-428G20.3.1	false	1.088901	probenecid (1.088901) CTC-428G20.3.1
1303	3.507460667	irinotecan (3.507460667) KB-1460A1.5.1	false	3.507460667	irinotecan (3.507460667) KB-1460A1.5.1
5642	-1.044899	parthenolide (-1.044899) RP11-649A18.7	false	-1.044899	parthenolide (-1.044899) RP11-649A18.7
4189	1.411995	6-benzylaminopurine (1.411995) RP11-72I8.1.1	false	1.411995	6-benzylaminopurine (1.411995) RP11-72I8.1.1
2387	1.46797	spectinomycin (1.46797) LINC00339	false	1.46797	spectinomycin (1.46797) LINC00339
3186	-1.054646	procyclidine (-1.054646) FAM182A	false	-1.054646	procyclidine (-1.054646) FAM182A
3196	2.688423	theophylline (2.688423) LL22NC03-2H8.5	false	2.688423	theophylline (2.688423) LL22NC03-2H8.5
1988	1.110673	cyclobenzaprine (1.110673) MIR22HG	false	1.110673	cyclobenzaprine (1.110673) MIR22HG
4422	-1.11301	carbamazepine (-1.11301) RP11-1148L6.5.1	false	-1.11301	carbamazepine (-1.11301) RP11-1148L6.5.1
5734	-1.127649391	trichostatin A (-1.127649391) CTA-204B4.6.1	false	-1.127649391	trichostatin A (-1.127649391) CTA-204B4.6.1
4440	1.03634	heptaminol (1.03634) AC012074.2.1	false	1.03634	heptaminol (1.03634) AC012074.2.1
4993	1.338772	trimethylcolchicinic acid (1.338772) ZNRD1-AS1	false	1.338772	trimethylcolchicinic acid (1.338772) ZNRD1-AS1
1875	-1.154557	daunorubicin (-1.154557) ZNF518A	false	-1.154557	daunorubicin (-1.154557) ZNF518A
3810	1.202864	dicoumarol (1.202864) LINC00342	false	1.202864	dicoumarol (1.202864) LINC00342
4591	2.082197	pepstatin (2.082197) FGD5-AS1	false	2.082197	pepstatin (2.082197) FGD5-AS1
2681	-2.043512	heliotrine (-2.043512) RP11-394A14.4	false	-2.043512	heliotrine (-2.043512) RP11-394A14.4
4527	-1.006069	myricetin (-1.006069) AC159540.1.1	false	-1.006069	myricetin (-1.006069) AC159540.1.1
2922	-1.848296	digoxigenin (-1.848296) LINC00341	false	-1.848296	digoxigenin (-1.848296) LINC00341
2367	1.12144	spectinomycin (1.12144) LINC00965	false	1.12144	spectinomycin (1.12144) LINC00965
5070	-1.482106	isopropamide iodide (-1.482106) RP11-148B6.1.1	false	-1.482106	isopropamide iodide (-1.482106) RP11-148B6.1.1
1974	-1.077794	dydrogesterone (-1.077794) U66059.58.1	false	-1.077794	dydrogesterone (-1.077794) U66059.58.1
4254	-1.195063	terfenadine (-1.195063) DLEU2	false	-1.195063	terfenadine (-1.195063) DLEU2
2754	-1.425036	profenamine (-1.425036) FGD5-AS1	false	-1.425036	profenamine (-1.425036) FGD5-AS1
5980	-1.341394333	thioridazine (-1.341394333) LL22NC03-2H8.5	false	-1.341394333	thioridazine (-1.341394333) LL22NC03-2H8.5
2077	-1.03897	letrozole (-1.03897) RP11-148B6.1.1	false	-1.03897	letrozole (-1.03897) RP11-148B6.1.1
2883	-1.139747	N-acetyl-L-leucine (-1.139747) RP11-1148L6.5.1	false	-1.139747	N-acetyl-L-leucine (-1.139747) RP11-1148L6.5.1
4462	1.263685	sulfaphenazole (1.263685) MCM3AP-AS1	false	1.263685	sulfaphenazole (1.263685) MCM3AP-AS1
4107	1.180835	minocycline (1.180835) AD000090.2.1	false	1.180835	minocycline (1.180835) AD000090.2.1
2488	-1.513709	tetroquinone (-1.513709) LL22NC03-2H8.5	false	-1.513709	tetroquinone (-1.513709) LL22NC03-2H8.5
1727	1.467977	butamben (1.467977) RP11-403P17.4.1	false	1.467977	butamben (1.467977) RP11-403P17.4.1
2517	-1.031817	etifenin (-1.031817) FGD5-AS1	false	-1.031817	etifenin (-1.031817) FGD5-AS1
3003	1.171997	(+/-)-catechin (1.171997) RP11-499E18.1.1	false	1.171997	(+/-)-catechin (1.171997) RP11-499E18.1.1
2158	-1.263159	quinisocaine (-1.263159) RP11-286E11.2.1	false	-1.263159	quinisocaine (-1.263159) RP11-286E11.2.1
2336	-1.710086	naftopidil (-1.710086) FAM182A	false	-1.710086	naftopidil (-1.710086) FAM182A
3909	-1.125173	trioxysalen (-1.125173) RP11-403C10.2.1	false	-1.125173	trioxysalen (-1.125173) RP11-403C10.2.1
2788	-1.522738	doxorubicin (-1.522738) BX004987.5.1	false	-1.522738	doxorubicin (-1.522738) BX004987.5.1
3786	-1.097379	ribostamycin (-1.097379) RP11-148B6.1.1	false	-1.097379	ribostamycin (-1.097379) RP11-148B6.1.1
3554	-1.288357	salsolidin (-1.288357) RP11-286E11.2.1	false	-1.288357	salsolidin (-1.288357) RP11-286E11.2.1
1830	-1.001564	adipiodone (-1.001564) RP11-1148L6.5.1	false	-1.001564	adipiodone (-1.001564) RP11-1148L6.5.1
6002	1.034828	tretinoin (1.034828) RP11-403P17.4.1	false	1.034828	tretinoin (1.034828) RP11-403P17.4.1
2044	1.047948	piperine (1.047948) LINC00339	false	1.047948	piperine (1.047948) LINC00339
1611	-1.103854	oxymetazoline (-1.103854) RP11-1148L6.5.1	false	-1.103854	oxymetazoline (-1.103854) RP11-1148L6.5.1
3221	1.1983615	nafcillin (1.1983615) LL22NC03-2H8.5	false	1.1983615	nafcillin (1.1983615) LL22NC03-2H8.5
3480	-1.231064	orciprenaline (-1.231064) FAM182A	false	-1.231064	orciprenaline (-1.231064) FAM182A
3874	-1.083222	terazosin (-1.083222) LL22NC03-2H8.5	false	-1.083222	terazosin (-1.083222) LL22NC03-2H8.5
5149	1.218582	lactobionic acid (1.218582) RP11-667K14.3	false	1.218582	lactobionic acid (1.218582) RP11-667K14.3
3409	-1.298503	etofenamate (-1.298503) RP11-1148L6.5.1	false	-1.298503	etofenamate (-1.298503) RP11-1148L6.5.1
4114	1.043086	pergolide (1.043086) AD000090.2.1	false	1.043086	pergolide (1.043086) AD000090.2.1
5969	-1.26406	haloperidol (-1.26406) AC005546.2	false	-1.26406	haloperidol (-1.26406) AC005546.2
1966	-1.514829	tocainide (-1.514829) U66059.58.1	false	-1.514829	tocainide (-1.514829) U66059.58.1
1403	1.005371	GW-8510 (1.005371) RP5-1068E13.3.1	false	1.005371	GW-8510 (1.005371) RP5-1068E13.3.1
4160	1.089883	fenoterol (1.089883) RP11-574K11.5.1	false	1.089883	fenoterol (1.089883) RP11-574K11.5.1
3887	1.041351	strophanthidin (1.041351) MAP3K14	false	1.041351	strophanthidin (1.041351) MAP3K14
3305	1.16961	zardaverine (1.16961) LINC00339	false	1.16961	zardaverine (1.16961) LINC00339
4296	1.334779	helveticoside (1.334779) MAP3K14	false	1.334779	helveticoside (1.334779) MAP3K14
2608	-1.1891255	0175029-0000 (-1.1891255) MCM3AP-AS1	false	-1.1891255	0175029-0000 (-1.1891255) MCM3AP-AS1
3412	1.2119255	harmol (1.2119255) KB-1460A1.5.1	false	1.2119255	harmol (1.2119255) KB-1460A1.5.1
2441	-1.597959	probenecid (-1.597959) DGCR5	false	-1.597959	probenecid (-1.597959) DGCR5
4312	-1.137297	helveticoside (-1.137297) LINC00341	false	-1.137297	helveticoside (-1.137297) LINC00341
5698	1.675022	trichostatin A (1.675022) LINC00472	false	1.675022	trichostatin A (1.675022) LINC00472
3479	-1.19011	orciprenaline (-1.19011) LINC00483	false	-1.19011	orciprenaline (-1.19011) LINC00483
2182	1.45189	isoxsuprine (1.45189) LINC00667	false	1.45189	isoxsuprine (1.45189) LINC00667
5028	-1.016675	withaferin A (-1.016675) AD000090.2.1	false	-1.016675	withaferin A (-1.016675) AD000090.2.1
5337	-1.823264	captopril (-1.823264) RP11-574K11.5.1	false	-1.823264	captopril (-1.823264) RP11-574K11.5.1
4776	-1.303901	trifluoperazine (-1.303901) LL22NC03-2H8.5	false	-1.303901	trifluoperazine (-1.303901) LL22NC03-2H8.5
1902	1.567667333	phenoxybenzamine (1.567667333) RP11-20I23.8.1	false	1.567667333	phenoxybenzamine (1.567667333) RP11-20I23.8.1
2378	-1.019488	spectinomycin (-1.019488) BX004987.5.1	false	-1.019488	spectinomycin (-1.019488) BX004987.5.1
4047	1.505860667	cephaeline (1.505860667) ZNRD1-AS1	false	1.505860667	cephaeline (1.505860667) ZNRD1-AS1
3881	1.411348	strophanthidin (1.411348) RP11-203B9.4.1	false	1.411348	strophanthidin (1.411348) RP11-203B9.4.1
3353	1.310803	proscillaridin (1.310803) MIR22HG	false	1.310803	proscillaridin (1.310803) MIR22HG
3996	-1.028449	puromycin (-1.028449) RP11-1148L6.5.1	false	-1.028449	puromycin (-1.028449) RP11-1148L6.5.1
5190	2.411971	danazol (2.411971) RP11-148G20.1.1	false	2.411971	danazol (2.411971) RP11-148G20.1.1
1607	-1.136722	PF-00539758-00 (-1.136722) RP11-1148L6.5.1	false	-1.136722	PF-00539758-00 (-1.136722) RP11-1148L6.5.1
2297	-2.026508	lumicolchicine (-2.026508) RP3-522P13.3.1	false	-2.026508	lumicolchicine (-2.026508) RP3-522P13.3.1
5041	1.013202	neostigmine bromide (1.013202) RP11-1148L6.5.1	false	1.013202	neostigmine bromide (1.013202) RP11-1148L6.5.1
4762	-1.001487	troglitazone (-1.001487) RP11-667K14.3	false	-1.001487	troglitazone (-1.001487) RP11-667K14.3
3507	-1.260986	benperidol (-1.260986) AC159540.1.1	false	-1.260986	benperidol (-1.260986) AC159540.1.1
3528	1.05658	norcyclobenzaprine (1.05658) RP11-203B9.4.1	false	1.05658	norcyclobenzaprine (1.05658) RP11-203B9.4.1
2287	1.645265	lumicolchicine (1.645265) RP11-499E18.1.1	false	1.645265	lumicolchicine (1.645265) RP11-499E18.1.1
1616	-1.135491	proxymetacaine (-1.135491) RP11-1148L6.5.1	false	-1.135491	proxymetacaine (-1.135491) RP11-1148L6.5.1
2744	-1.076133	felbinac (-1.076133) RP11-403C10.2.1	false	-1.076133	felbinac (-1.076133) RP11-403C10.2.1
3401	-1.109624	molindone (-1.109624) LINC00483	false	-1.109624	molindone (-1.109624) LINC00483
2574	-1.306757	phentolamine (-1.306757) RP11-1148L6.5.1	false	-1.306757	phentolamine (-1.306757) RP11-1148L6.5.1
1347	1.497298	norfloxacin (1.497298) RP11-148B6.1.1	false	1.497298	norfloxacin (1.497298) RP11-148B6.1.1
3049	-1.645642	mestranol (-1.645642) FAM182A	false	-1.645642	mestranol (-1.645642) FAM182A
2956	1.144606	capsaicin (1.144606) RP11-667K14.3	false	1.144606	capsaicin (1.144606) RP11-667K14.3
3168	-1.346475	fosfosal (-1.346475) U66059.58.1	false	-1.346475	fosfosal (-1.346475) U66059.58.1
2824	-1.037299	brinzolamide (-1.037299) RP4-669P10.16.1	false	-1.037299	brinzolamide (-1.037299) RP4-669P10.16.1
3102	-1.001218	reserpine (-1.001218) PDXDC2P	false	-1.001218	reserpine (-1.001218) PDXDC2P
5347	-1.302556	oxetacaine (-1.302556) RP11-612B6.2.1	false	-1.302556	oxetacaine (-1.302556) RP11-612B6.2.1
5567	2.057761	lobeline (2.057761) RP11-517A5.4	false	2.057761	lobeline (2.057761) RP11-517A5.4
1861	1.045325	estrone (1.045325) RP11-203B9.4.1	false	1.045325	estrone (1.045325) RP11-203B9.4.1
1460	1.514534	lomustine (1.514534) HLA-F-AS1	false	1.514534	lomustine (1.514534) HLA-F-AS1
5233	-1.059609	edrophonium chloride (-1.059609) RP11-1376P16.2	false	-1.059609	edrophonium chloride (-1.059609) RP11-1376P16.2
1357	-1.005564	cefotaxime (-1.005564) AC012074.2.1	false	-1.005564	cefotaxime (-1.005564) AC012074.2.1
3595	-1.29762	vitexin (-1.29762) LL22NC03-2H8.5	false	-1.29762	vitexin (-1.29762) LL22NC03-2H8.5
4919	-1.306682	propidium iodide (-1.306682) LL22NC03-2H8.5	false	-1.306682	propidium iodide (-1.306682) LL22NC03-2H8.5
2637	1.307198	riluzole (1.307198) RP11-1148L6.5.1	false	1.307198	riluzole (1.307198) RP11-1148L6.5.1
5688	1.129446	trichostatin A (1.129446) RP11-348N5.7	false	1.129446	trichostatin A (1.129446) RP11-348N5.7
2955	-1.160262	capsaicin (-1.160262) LL22NC03-2H8.5	false	-1.160262	capsaicin (-1.160262) LL22NC03-2H8.5
1517	-1.045602	flupentixol (-1.045602) FGD5-AS1	false	-1.045602	flupentixol (-1.045602) FGD5-AS1
5163	1.116408	chlortetracycline (1.116408) FGD5-AS1	false	1.116408	chlortetracycline (1.116408) FGD5-AS1
2233	-1.044652	atovaquone (-1.044652) LINC00342	false	-1.044652	atovaquone (-1.044652) LINC00342
3760	-1.414547	corbadrine (-1.414547) RP11-148B6.1.1	false	-1.414547	corbadrine (-1.414547) RP11-148B6.1.1
2733	1.185481	sulfadimidine (1.185481) AC005546.2	false	1.185481	sulfadimidine (1.185481) AC005546.2
5382	1.357928	idoxuridine (1.357928) AD000090.2.1	false	1.357928	idoxuridine (1.357928) AD000090.2.1
2816	1.041453	mitoxantrone (1.041453) RP3-522P13.3.1	false	1.041453	mitoxantrone (1.041453) RP3-522P13.3.1
1889	-1.151577	pentolonium (-1.151577) RP11-403P17.4.1	false	-1.151577	pentolonium (-1.151577) RP11-403P17.4.1
1671	-1.534464	H-7 (-1.534464) RP11-403P17.4.1	false	-1.534464	H-7 (-1.534464) RP11-403P17.4.1
3859	-1.239389	medrysone (-1.239389) RP4-564F22.2.1	false	-1.239389	medrysone (-1.239389) RP4-564F22.2.1
1506	-1.204455	vinburnine (-1.204455) AD000090.2.1	false	-1.204455	vinburnine (-1.204455) AD000090.2.1
5246	1.031078	ethambutol (1.031078) RP11-667K14.3	false	1.031078	ethambutol (1.031078) RP11-667K14.3
1568	1.199066	proxyphylline (1.199066) RP11-72I8.1.1	false	1.199066	proxyphylline (1.199066) RP11-72I8.1.1
3249	1.004562	betulin (1.004562) ZNRD1-AS1	false	1.004562	betulin (1.004562) ZNRD1-AS1
5651	-1.715939	parthenolide (-1.715939) MCM3AP-AS1	false	-1.715939	parthenolide (-1.715939) MCM3AP-AS1
4376	2.139828667	emetine (2.139828667) CROCCP2	false	2.139828667	emetine (2.139828667) CROCCP2
2223	1.579739	atovaquone (1.579739) RP11-499E18.1.1	false	1.579739	atovaquone (1.579739) RP11-499E18.1.1
4528	-1.120596	mebhydrolin (-1.120596) DGCR11	false	-1.120596	mebhydrolin (-1.120596) DGCR11
3076	1.407376	reserpine (1.407376) LINC00667	false	1.407376	reserpine (1.407376) LINC00667
2874	1.585096	chrysin (1.585096) RP11-566E18.3.1	false	1.585096	chrysin (1.585096) RP11-566E18.3.1
3537	-1.032471	cetirizine (-1.032471) U66059.58.1	false	-1.032471	cetirizine (-1.032471) U66059.58.1
2539	-1.022058	CP-320650-01 (-1.022058) DLEU2	false	-1.022058	CP-320650-01 (-1.022058) DLEU2
5298	-1.225649	metronidazole (-1.225649) MAP3K14	false	-1.225649	metronidazole (-1.225649) MAP3K14
5048	-1.016975	caffeic acid (-1.016975) RP3-522P13.3.1	false	-1.016975	caffeic acid (-1.016975) RP3-522P13.3.1
1961	1.821576	tocainide (1.821576) LL22NC03-2H8.5	false	1.821576	tocainide (1.821576) LL22NC03-2H8.5
4331	-1.216472	eldeline (-1.216472) LL22NC03-2H8.5	false	-1.216472	eldeline (-1.216472) LL22NC03-2H8.5
2331	1.383218	naftopidil (1.383218) LINC00339	false	1.383218	naftopidil (1.383218) LINC00339
2406	-1.746669	galantamine (-1.746669) U66059.58.1	false	-1.746669	galantamine (-1.746669) U66059.58.1
3324	-1.320573	epitiostanol (-1.320573) SNHG3	false	-1.320573	epitiostanol (-1.320573) SNHG3
4868	-1.238248	vorinostat (-1.238248) SNHG3	false	-1.238248	vorinostat (-1.238248) SNHG3
5439	1.103897	pyrimethamine (1.103897) RP11-617F23.1.1	false	1.103897	pyrimethamine (1.103897) RP11-617F23.1.1
4426	1.642894	todralazine (1.642894) RP11-667K14.3	false	1.642894	todralazine (1.642894) RP11-667K14.3
4017	-1.477698	menadione (-1.477698) CASP8AP2	false	-1.477698	menadione (-1.477698) CASP8AP2
5931	-1.102119	deferoxamine (-1.102119) RP11-403P17.4.1	false	-1.102119	deferoxamine (-1.102119) RP11-403P17.4.1
2561	1.700832	rifabutin (1.700832) RP11-499E18.1.1	false	1.700832	rifabutin (1.700832) RP11-499E18.1.1
5732	1.110057	trichostatin A (1.110057) RP11-101E13.5	false	1.110057	trichostatin A (1.110057) RP11-101E13.5
2589	1.096292	flutamide (1.096292) RP11-148B6.1.1	false	1.096292	flutamide (1.096292) RP11-148B6.1.1
2205	-1.16788	isoxsuprine (-1.16788) PDXDC2P	false	-1.16788	isoxsuprine (-1.16788) PDXDC2P
4150	1.116177	bufexamac (1.116177) ZNRD1-AS1	false	1.116177	bufexamac (1.116177) ZNRD1-AS1
5737	-1.356726667	trichostatin A (-1.356726667) WT1-AS	false	-1.356726667	trichostatin A (-1.356726667) WT1-AS
5441	-1.100612	pyrimethamine (-1.100612) RP11-655M14.13.1	false	-1.100612	pyrimethamine (-1.100612) RP11-655M14.13.1
4231	-1.000325	mephenesin (-1.000325) LL22NC03-2H8.5	false	-1.000325	mephenesin (-1.000325) LL22NC03-2H8.5
4715	-1.274682	ouabain (-1.274682) C12orf47	false	-1.274682	ouabain (-1.274682) C12orf47
5448	-1.429676	pyrimethamine (-1.429676) DGCR5	false	-1.429676	pyrimethamine (-1.429676) DGCR5
5063	-1.168825	mycophenolic acid (-1.168825) RP11-1148L6.5.1	false	-1.168825	mycophenolic acid (-1.168825) RP11-1148L6.5.1
1892	1.240536	ofloxacin (1.240536) RP11-1148L6.5.1	false	1.240536	ofloxacin (1.240536) RP11-1148L6.5.1
1394	-1.393535	GW-8510 (-1.393535) RP11-762H8.1.1	false	-1.393535	GW-8510 (-1.393535) RP11-762H8.1.1
1319	1.480682333	irinotecan (1.480682333) C11orf95	false	1.480682333	irinotecan (1.480682333) C11orf95
3564	1.123981	salsolidin (1.123981) CROCCP2	false	1.123981	salsolidin (1.123981) CROCCP2
3011	1.029262	(+/-)-catechin (1.029262) RP11-394A14.4	false	1.029262	(+/-)-catechin (1.029262) RP11-394A14.4
5168	1.271949	chlortetracycline (1.271949) LA16c-381G6.1.1	false	1.271949	chlortetracycline (1.271949) LA16c-381G6.1.1
3546	1.00936	salsolidin (1.00936) AC004447.2	false	1.00936	salsolidin (1.00936) AC004447.2
5316	1.525384	diflunisal (1.525384) LL22NC03-2H8.5	false	1.525384	diflunisal (1.525384) LL22NC03-2H8.5
5896	1.053933	resveratrol (1.053933) KB-1460A1.5.1	false	1.053933	resveratrol (1.053933) KB-1460A1.5.1
4565	3.035852	pepstatin (3.035852) LL22NC03-2H8.5	false	3.035852	pepstatin (3.035852) LL22NC03-2H8.5
2667	-1.364235	0179445-0000 (-1.364235) LINC00339	false	-1.364235	0179445-0000 (-1.364235) LINC00339
2039	1.321849	piperine (1.321849) AD000090.2.1	false	1.321849	piperine (1.321849) AD000090.2.1
2900	-1.588536	tyloxapol (-1.588536) LL22NC03-2H8.5	false	-1.588536	tyloxapol (-1.588536) LL22NC03-2H8.5
5876	-1.111481	dizocilpine (-1.111481) RP11-1148L6.5.1	false	-1.111481	dizocilpine (-1.111481) RP11-1148L6.5.1
2392	-1.334237	spectinomycin (-1.334237) FAM182A	false	-1.334237	spectinomycin (-1.334237) FAM182A
5391	-1.21409	idoxuridine (-1.21409) MEG3	false	-1.21409	idoxuridine (-1.21409) MEG3
1769	-1.110746	xamoterol (-1.110746) RP11-612B6.2.1	false	-1.110746	xamoterol (-1.110746) RP11-612B6.2.1
4275	1.918946	lycorine (1.918946) NEAT1	false	1.918946	lycorine (1.918946) NEAT1
1713	1.140015	dexpropranolol (1.140015) ATXN8OS	false	1.140015	dexpropranolol (1.140015) ATXN8OS
4558	-1.350856	mebhydrolin (-1.350856) RP11-1148L6.5.1	false	-1.350856	mebhydrolin (-1.350856) RP11-1148L6.5.1
4945	-1.181495	14-aminocephalosporanic acid (-1.181495) SNHG3	false	-1.181495	14-aminocephalosporanic acid (-1.181495) SNHG3
4140	1.021477	homochlorcyclizine (1.021477) LL22NC03-2H8.5	false	1.021477	homochlorcyclizine (1.021477) LL22NC03-2H8.5
3563	1.824825	salsolidin (1.824825) FGD5-AS1	false	1.824825	salsolidin (1.824825) FGD5-AS1
3636	1.074547	iopamidol (1.074547) LINC00339	false	1.074547	iopamidol (1.074547) LINC00339
1582	-1.357098	flucytosine (-1.357098) FGD5-AS1	false	-1.357098	flucytosine (-1.357098) FGD5-AS1
2594	1.46564	levcycloserine (1.46564) FGD5-AS1	false	1.46564	levcycloserine (1.46564) FGD5-AS1
1997	1.099078	phenazone (1.099078) RP11-499E18.1.1	false	1.099078	phenazone (1.099078) RP11-499E18.1.1
2811	-1.3865335	mitoxantrone (-1.3865335) RP11-152N13.16	false	-1.3865335	mitoxantrone (-1.3865335) RP11-152N13.16
5925	-1.298742	gefitinib (-1.298742) RP11-394A14.4	false	-1.298742	gefitinib (-1.298742) RP11-394A14.4
1946	1.486592	dantrolene (1.486592) LL22NC03-2H8.5	false	1.486592	dantrolene (1.486592) LL22NC03-2H8.5
5354	-1.050769	oxetacaine (-1.050769) RP3-522P13.3.1	false	-1.050769	oxetacaine (-1.050769) RP3-522P13.3.1
3930	1.323853	tetryzoline (1.323853) RP11-403C10.2.1	false	1.323853	tetryzoline (1.323853) RP11-403C10.2.1
3688	1.007123	amrinone (1.007123) AC006042.6.1	false	1.007123	amrinone (1.007123) AC006042.6.1
5040	-1.365946	neostigmine bromide (-1.365946) RP11-612B6.2.1	false	-1.365946	neostigmine bromide (-1.365946) RP11-612B6.2.1
2946	-1.253292	Prestwick-860 (-1.253292) LL22NC03-2H8.5	false	-1.253292	Prestwick-860 (-1.253292) LL22NC03-2H8.5
4798	-1.013595	sirolimus (-1.013595) RP4-564F22.2.1	false	-1.013595	sirolimus (-1.013595) RP4-564F22.2.1
3687	1.052534	amrinone (1.052534) RP11-1148L6.5.1	false	1.052534	amrinone (1.052534) RP11-1148L6.5.1
3068	1.060956	indoprofen (1.060956) RP11-394A14.4	false	1.060956	indoprofen (1.060956) RP11-394A14.4
1483	-1.793466	scriptaid (-1.793466) RP11-1148L6.5.1	false	-1.793466	scriptaid (-1.793466) RP11-1148L6.5.1
4082	-1.887977	digoxin (-1.887977) LINC00094	false	-1.887977	digoxin (-1.887977) LINC00094
4369	2.351729	emetine (2.351729) ZNRD1-AS1	false	2.351729	emetine (2.351729) ZNRD1-AS1
3989	1.513327	puromycin (1.513327) MAP3K14	false	1.513327	puromycin (1.513327) MAP3K14
1825	1.099052	deptropine (1.099052) MIR22HG	false	1.099052	deptropine (1.099052) MIR22HG
4769	1.067024	clozapine (1.067024) AC007319.1.1	false	1.067024	clozapine (1.067024) AC007319.1.1
3697	-1.012385	cicloheximide (-1.012385) SNHG3	false	-1.012385	cicloheximide (-1.012385) SNHG3
4223	-1.258301	tropicamide (-1.258301) LL22NC03-2H8.5	false	-1.258301	tropicamide (-1.258301) LL22NC03-2H8.5
5336	1.012736	captopril (1.012736) RP11-1148L6.5.1	false	1.012736	captopril (1.012736) RP11-1148L6.5.1
4854	1.0934905	vorinostat (1.0934905) LINC00667	false	1.0934905	vorinostat (1.0934905) LINC00667
2358	-1.060275	conessine (-1.060275) MEG3	false	-1.060275	conessine (-1.060275) MEG3
4897	2.078504	18-delta prostaglandin J2 (2.078504) MIR22HG	false	2.078504	18-delta prostaglandin J2 (2.078504) MIR22HG
5132	-1.768096	scopolamine N-oxide (-1.768096) RP11-1148L6.5.1	false	-1.768096	scopolamine N-oxide (-1.768096) RP11-1148L6.5.1
4791	1.053588	alvespimycin (1.053588) AC006042.6.1	false	1.053588	alvespimycin (1.053588) AC006042.6.1
2867	-1.177613	isradipine (-1.177613) LL22NC03-2H8.5	false	-1.177613	isradipine (-1.177613) LL22NC03-2H8.5
3039	1.296948	mestranol (1.296948) FGD5-AS1	false	1.296948	mestranol (1.296948) FGD5-AS1
4292	1.043212	helveticoside (1.043212) RP11-680F8.4.1	false	1.043212	helveticoside (1.043212) RP11-680F8.4.1
5278	1.141133	metronidazole (1.141133) RP11-255C15.3.1	false	1.141133	metronidazole (1.141133) RP11-255C15.3.1
1488	1.15243	0297417-0002B (1.15243) RP11-473M20.14	false	1.15243	0297417-0002B (1.15243) RP11-473M20.14
4025	-1.083818	bisacodyl (-1.083818) RP11-101E13.5	false	-1.083818	bisacodyl (-1.083818) RP11-101E13.5
1866	1.142531	daunorubicin (1.142531) RP11-1148L6.5.1	false	1.142531	daunorubicin (1.142531) RP11-1148L6.5.1
4081	-2.117765333	digoxin (-2.117765333) AD000090.2.1	false	-2.117765333	digoxin (-2.117765333) AD000090.2.1
4505	1.423186	carteolol (1.423186) RP11-667K14.3	false	1.423186	carteolol (1.423186) RP11-667K14.3
1455	-1.147326	alsterpaullone (-1.147326) RP4-564F22.2.1	false	-1.147326	alsterpaullone (-1.147326) RP4-564F22.2.1
4208	-1.083761	camptothecin (-1.083761) BX004987.5.1	false	-1.083761	camptothecin (-1.083761) BX004987.5.1
3373	2.18932	molindone (2.18932) LL22NC03-2H8.5	false	2.18932	molindone (2.18932) LL22NC03-2H8.5
5631	-1.114667	laudanosine (-1.114667) RP11-655M14.13.1	false	-1.114667	laudanosine (-1.114667) RP11-655M14.13.1
3447	-1.389232	colistin (-1.389232) RP3-522P13.3.1	false	-1.389232	colistin (-1.389232) RP3-522P13.3.1
5280	1.160378	metronidazole (1.160378) RP11-680F8.4.1	false	1.160378	metronidazole (1.160378) RP11-680F8.4.1
5105	-1.062822	lanatoside C (-1.062822) ZNRD1-AS1	false	-1.062822	lanatoside C (-1.062822) ZNRD1-AS1
3279	-1.265408	sanguinarine (-1.265408) CTA-204B4.6.1	false	-1.265408	sanguinarine (-1.265408) CTA-204B4.6.1
3239	1.651071	pyrvinium (1.651071) SNHG3	false	1.651071	pyrvinium (1.651071) SNHG3
4348	1.662748	emetine (1.662748) U47924.30	false	1.662748	emetine (1.662748) U47924.30
4359	-1.402946	emetine (-1.402946) U66059.58.1	false	-1.402946	emetine (-1.402946) U66059.58.1
3964	-1.027686	nifuroxazide (-1.027686) LINC00483	false	-1.027686	nifuroxazide (-1.027686) LINC00483
4721	1.484378	ouabain (1.484378) RP11-49C24.1.1	false	1.484378	ouabain (1.484378) RP11-49C24.1.1
4018	-1.241721	menadione (-1.241721) RP11-259N19.1	false	-1.241721	menadione (-1.241721) RP11-259N19.1
5224	-1.364526	azacyclonol (-1.364526) RP11-977G19.11.1	false	-1.364526	azacyclonol (-1.364526) RP11-977G19.11.1
2231	-1.056687	atovaquone (-1.056687) C9orf31	false	-1.056687	atovaquone (-1.056687) C9orf31
3838	1.398947	meclofenoxate (1.398947) AC159540.1.1	false	1.398947	meclofenoxate (1.398947) AC159540.1.1
2016	1.069198	Prestwick-967 (1.069198) AD000090.2.1	false	1.069198	Prestwick-967 (1.069198) AD000090.2.1
5519	1.906873	sulfathiazole (1.906873) CTD-2562J17.7.1	false	1.906873	sulfathiazole (1.906873) CTD-2562J17.7.1
4577	-1.825216	pepstatin (-1.825216) RP11-148B6.1.1	false	-1.825216	pepstatin (-1.825216) RP11-148B6.1.1
2415	1.254464	galantamine (1.254464) DLEU2	false	1.254464	galantamine (1.254464) DLEU2
1953	1.461319	piperacillin (1.461319) LINC00342	false	1.461319	piperacillin (1.461319) LINC00342
4633	1.586754	SR-95531 (1.586754) CTD-2562J17.7.1	false	1.586754	SR-95531 (1.586754) CTD-2562J17.7.1
3823	-1.331242	flunixin (-1.331242) DLEU2	false	-1.331242	flunixin (-1.331242) DLEU2
1967	1.074351	tocainide (1.074351) AD000090.2.1	false	1.074351	tocainide (1.074351) AD000090.2.1
5668	-1.097742	trichostatin A (-1.097742) RP11-566E18.3.1	false	-1.097742	trichostatin A (-1.097742) RP11-566E18.3.1
3454	1.015808	colistin (1.015808) MIR22HG	false	1.015808	colistin (1.015808) MIR22HG
4485	-1.001161	azathioprine (-1.001161) RP11-667K14.3	false	-1.001161	azathioprine (-1.001161) RP11-667K14.3
3172	1.068626	fosfosal (1.068626) CROCCP2	false	1.068626	fosfosal (1.068626) CROCCP2
1901	1.018906	enoxacin (1.018906) CTD-2562J17.7.1	false	1.018906	enoxacin (1.018906) CTD-2562J17.7.1
5077	-1.416612	pipenzolate bromide (-1.416612) RP11-612B6.2.1	false	-1.416612	pipenzolate bromide (-1.416612) RP11-612B6.2.1
3758	1.145016	corbadrine (1.145016) KB-1460A1.5.1	false	1.145016	corbadrine (1.145016) KB-1460A1.5.1
1687	-1.33806075	pioglitazone (-1.33806075) RP11-1148L6.5.1	false	-1.33806075	pioglitazone (-1.33806075) RP11-1148L6.5.1
5574	1.416769	lobeline (1.416769) RP5-1184F4.5.1	false	1.416769	lobeline (1.416769) RP5-1184F4.5.1
2650	-1.267312	foliosidine (-1.267312) RP11-517A5.4	false	-1.267312	foliosidine (-1.267312) RP11-517A5.4
5390	1.313494	idoxuridine (1.313494) LINC00339	false	1.313494	idoxuridine (1.313494) LINC00339
2704	-1.069813	demeclocycline (-1.069813) RP11-517A5.4	false	-1.069813	demeclocycline (-1.069813) RP11-517A5.4
3630	1.163675	iopamidol (1.163675) RP11-667K14.3	false	1.163675	iopamidol (1.163675) RP11-667K14.3
2446	-1.786822	probenecid (-1.786822) RP3-522P13.3.1	false	-1.786822	probenecid (-1.786822) RP3-522P13.3.1
2059	-1.224277	cefalonium (-1.224277) DGCR5	false	-1.224277	cefalonium (-1.224277) DGCR5
5154	1.017116	nordihydroguaiaretic acid (1.017116) RP11-152N13.16	false	1.017116	nordihydroguaiaretic acid (1.017116) RP11-152N13.16
3954	1.167482	quercetin (1.167482) AD000090.2.1	false	1.167482	quercetin (1.167482) AD000090.2.1
1554	-1.17176	6-bromoindirubin-3'-oxime (-1.17176) LINC00342	false	-1.17176	6-bromoindirubin-3'-oxime (-1.17176) LINC00342
2452	1.278527	probenecid (1.278527) FGD5-AS1	false	1.278527	probenecid (1.278527) FGD5-AS1
3901	-1.09977	fluorocurarine (-1.09977) AC012065.7.1	false	-1.09977	fluorocurarine (-1.09977) AC012065.7.1
2123	1.057623	salsolinol (1.057623) AD000090.2.1	false	1.057623	salsolinol (1.057623) AD000090.2.1
2844	1.025435	quinidine (1.025435) LL22NC03-2H8.5	false	1.025435	quinidine (1.025435) LL22NC03-2H8.5
2939	1.7549	luteolin (1.7549) RP11-499E18.1.1	false	1.7549	luteolin (1.7549) RP11-499E18.1.1
3698	-1.139675	cicloheximide (-1.139675) LINC00341	false	-1.139675	cicloheximide (-1.139675) LINC00341
2469	1.056096	metacycline (1.056096) FGD5-AS1	false	1.056096	metacycline (1.056096) FGD5-AS1
1932	1.093188	Prestwick-692 (1.093188) KIR3DP1	false	1.093188	Prestwick-692 (1.093188) KIR3DP1
1501	-1.004918	SB-202190 (-1.004918) DLEU2	false	-1.004918	SB-202190 (-1.004918) DLEU2
2713	-1.08038	(-)-isoprenaline (-1.08038) SNHG3	false	-1.08038	(-)-isoprenaline (-1.08038) SNHG3
2112	-1.023126	seneciphylline (-1.023126) ABO	false	-1.023126	seneciphylline (-1.023126) ABO
5526	-1.113567	sulfathiazole (-1.113567) RP11-170N11.1.1	false	-1.113567	sulfathiazole (-1.113567) RP11-170N11.1.1
5794	1.037191	clotrimazole (1.037191) LL22NC03-2H8.5	false	1.037191	clotrimazole (1.037191) LL22NC03-2H8.5
4105	1.122236	minocycline (1.122236) RP11-667K14.3	false	1.122236	minocycline (1.122236) RP11-667K14.3
4981	-1.07051	trimethylcolchicinic acid (-1.07051) RP11-499P20.2.1	false	-1.07051	trimethylcolchicinic acid (-1.07051) RP11-499P20.2.1
2023	-1.038183	Prestwick-967 (-1.038183) CYP4F8	false	-1.038183	Prestwick-967 (-1.038183) CYP4F8
3908	-1.051403	cefalotin (-1.051403) ZNRD1-AS1	false	-1.051403	cefalotin (-1.051403) ZNRD1-AS1
5623	1.983034	ajmaline (1.983034) RP11-148G20.1.1	false	1.983034	ajmaline (1.983034) RP11-148G20.1.1
2506	1.015837	canadine (1.015837) LL22NC03-2H8.5	false	1.015837	canadine (1.015837) LL22NC03-2H8.5
4491	1.238414	naloxone (1.238414) RP11-1148L6.5.1	false	1.238414	naloxone (1.238414) RP11-1148L6.5.1
5140	-1.332127	betulinic acid (-1.332127) RP11-395B7.2.1	false	-1.332127	betulinic acid (-1.332127) RP11-395B7.2.1
1808	1.205733	diclofenamide (1.205733) DLEU2	false	1.205733	diclofenamide (1.205733) DLEU2
1529	1.167572	ciclopirox (1.167572) AC007319.1.1	false	1.167572	ciclopirox (1.167572) AC007319.1.1
1367	-1.195215	PHA-00816795 (-1.195215) AC012065.7.1	false	-1.195215	PHA-00816795 (-1.195215) AC012065.7.1
2433	-1.223025	probenecid (-1.223025) RP1-302G2.5	false	-1.223025	probenecid (-1.223025) RP1-302G2.5
4610	1.067635	apigenin (1.067635) AC004447.2	false	1.067635	apigenin (1.067635) AC004447.2
3639	1.120973	gabapentin (1.120973) RP11-152N13.16	false	1.120973	gabapentin (1.120973) RP11-152N13.16
3997	1.047382	puromycin (1.047382) RP4-564F22.2.1	false	1.047382	puromycin (1.047382) RP4-564F22.2.1
3307	-1.105654	zardaverine (-1.105654) FAM182A	false	-1.105654	zardaverine (-1.105654) FAM182A
2246	1.057127	canavanine (1.057127) LINC00667	false	1.057127	canavanine (1.057127) LINC00667
5613	-1.060356	syrosingopine (-1.060356) AC159540.1.1	false	-1.060356	syrosingopine (-1.060356) AC159540.1.1
5157	1.07451	nordihydroguaiaretic acid (1.07451) RP11-403P17.4.1	false	1.07451	nordihydroguaiaretic acid (1.07451) RP11-403P17.4.1
5797	1.233292	glibenclamide (1.233292) LL22NC03-2H8.5	false	1.233292	glibenclamide (1.233292) LL22NC03-2H8.5
3768	1.117167	hexylcaine (1.117167) RP11-403P17.4.1	false	1.117167	hexylcaine (1.117167) RP11-403P17.4.1
2797	-1.043819	doxorubicin (-1.043819) PLK1S1	false	-1.043819	doxorubicin (-1.043819) PLK1S1
5632	1.162972	laudanosine (1.162972) HCP5	false	1.162972	laudanosine (1.162972) HCP5
4707	-1.4705545	anisomycin (-1.4705545) CASP8AP2	false	-1.4705545	anisomycin (-1.4705545) CASP8AP2
4522	1.469772	digitoxigenin (1.469772) RP11-1148L6.5.1	false	1.469772	digitoxigenin (1.469772) RP11-1148L6.5.1
5334	1.001663	diflunisal (1.001663) RP11-1148L6.5.1	false	1.001663	diflunisal (1.001663) RP11-1148L6.5.1
4710	-1.29632	ouabain (-1.29632) LINC00342	false	-1.29632	ouabain (-1.29632) LINC00342
3987	1.154266	serotonin (1.154266) RP11-1148L6.5.1	false	1.154266	serotonin (1.154266) RP11-1148L6.5.1
1960	-1.354001	picrotoxinin (-1.354001) RP11-1148L6.5.1	false	-1.354001	picrotoxinin (-1.354001) RP11-1148L6.5.1
2741	1.237375	eucatropine (1.237375) RP11-667K14.3	false	1.237375	eucatropine (1.237375) RP11-667K14.3
4624	1.051454	SR-95531 (1.051454) CEBPA-AS1	false	1.051454	SR-95531 (1.051454) CEBPA-AS1
2317	-1.189906	naftopidil (-1.189906) RP11-655M14.13.1	false	-1.189906	naftopidil (-1.189906) RP11-655M14.13.1
5744	-1.291515	propafenone (-1.291515) LL22NC03-2H8.5	false	-1.291515	propafenone (-1.291515) LL22NC03-2H8.5
1867	1.624153	daunorubicin (1.624153) C11orf95	false	1.624153	daunorubicin (1.624153) C11orf95
5125	1.392101	co-dergocrine mesilate (1.392101) RP11-667K14.3	false	1.392101	co-dergocrine mesilate (1.392101) RP11-667K14.3
2555	1.244292	fenbendazole (1.244292) RP11-1148L6.5.1	false	1.244292	fenbendazole (1.244292) RP11-1148L6.5.1
3019	2.575615	mestranol (2.575615) LL22NC03-2H8.5	false	2.575615	mestranol (2.575615) LL22NC03-2H8.5
6003	1.376989	tretinoin (1.376989) RP11-403C10.2.1	false	1.376989	tretinoin (1.376989) RP11-403C10.2.1
5881	1.697567	clindamycin (1.697567) RP4-802A10.1	false	1.697567	clindamycin (1.697567) RP4-802A10.1
4613	1.208751	apigenin (1.208751) RP11-566E18.3.1	false	1.208751	apigenin (1.208751) RP11-566E18.3.1
1346	-1.15547	norfloxacin (-1.15547) CTD-2562J17.7.1	false	-1.15547	norfloxacin (-1.15547) CTD-2562J17.7.1
1839	1.286941	imidurea (1.286941) RP11-667K14.3	false	1.286941	imidurea (1.286941) RP11-667K14.3
3077	-1.11275	reserpine (-1.11275) RP1-302G2.5	false	-1.11275	reserpine (-1.11275) RP1-302G2.5
5687	1.2429897	trichostatin A (1.2429897) KB-1460A1.5.1	false	1.2429897	trichostatin A (1.2429897) KB-1460A1.5.1
3317	1.447532	epitiostanol (1.447532) RP11-667K14.3	false	1.447532	epitiostanol (1.447532) RP11-667K14.3
2691	-1.304641	fenoprofen (-1.304641) RP11-517A5.4	false	-1.304641	fenoprofen (-1.304641) RP11-517A5.4
3026	-1.574471	mestranol (-1.574471) RP11-286E11.2.1	false	-1.574471	mestranol (-1.574471) RP11-286E11.2.1
5104	1.092605	lanatoside C (1.092605) FGD5-AS1	false	1.092605	lanatoside C (1.092605) FGD5-AS1
3796	-1.080908	alexidine (-1.080908) RP11-152N13.16	false	-1.080908	alexidine (-1.080908) RP11-152N13.16
1715	1.132286	lidoflazine (1.132286) RP11-203B9.4.1	false	1.132286	lidoflazine (1.132286) RP11-203B9.4.1
5917	1.1992965	geldanamycin (1.1992965) MIR22HG	false	1.1992965	geldanamycin (1.1992965) MIR22HG
2977	1.110139	latamoxef (1.110139) C8orf71	false	1.110139	latamoxef (1.110139) C8orf71
2168	1.012989	quinisocaine (1.012989) DLEU2	false	1.012989	quinisocaine (1.012989) DLEU2
3582	-1.417941	hydroxyachillin (-1.417941) RP3-522P13.3.1	false	-1.417941	hydroxyachillin (-1.417941) RP3-522P13.3.1
1511	1.000984	antazoline (1.000984) AC007319.1.1	false	1.000984	antazoline (1.000984) AC007319.1.1
4883	1.093255	31-delta prostaglandin J2 (1.093255) RP11-403P17.4.1	false	1.093255	31-delta prostaglandin J2 (1.093255) RP11-403P17.4.1
4910	-1.280827	glycocholic acid (-1.280827) LL22NC03-2H8.5	false	-1.280827	glycocholic acid (-1.280827) LL22NC03-2H8.5
2230	-1.338328	atovaquone (-1.338328) EGOT	false	-1.338328	atovaquone (-1.338328) EGOT
4812	1.01362	fulvestrant (1.01362) ZNRD1-AS1	false	1.01362	fulvestrant (1.01362) ZNRD1-AS1
2030	2.638294	piperine (2.638294) LL22NC03-2H8.5	false	2.638294	piperine (2.638294) LL22NC03-2H8.5
4821	1.010776	LY-294002 (1.010776) RP11-473M20.14	false	1.010776	LY-294002 (1.010776) RP11-473M20.14
1939	1.084638	tinidazole (1.084638) RP11-667K14.3	false	1.084638	tinidazole (1.084638) RP11-667K14.3
1761	-1.052279	procaine (-1.052279) RP11-1148L6.5.1	false	-1.052279	procaine (-1.052279) RP11-1148L6.5.1
3889	-2.0785565	strophanthidin (-2.0785565) AD000090.2.1	false	-2.0785565	strophanthidin (-2.0785565) AD000090.2.1
2420	1.070335	galantamine (1.070335) ZNRD1-AS1	false	1.070335	galantamine (1.070335) ZNRD1-AS1
5219	1.842932	azacyclonol (1.842932) RP4-564F22.2.1	false	1.842932	azacyclonol (1.842932) RP4-564F22.2.1
5735	-1.275217237	trichostatin A (-1.275217237) SNHG3	false	-1.275217237	trichostatin A (-1.275217237) SNHG3
3705	1.593176	cinoxacin (1.593176) RP11-762H8.1.1	false	1.593176	cinoxacin (1.593176) RP11-762H8.1.1
1754	-1.3649045	remoxipride (-1.3649045) RP11-1148L6.5.1	false	-1.3649045	remoxipride (-1.3649045) RP11-1148L6.5.1
2719	1.133002	cyclopentolate (1.133002) RP11-395B7.2.1	false	1.133002	cyclopentolate (1.133002) RP11-395B7.2.1
2363	1.040691	meptazinol (1.040691) DLEU2	false	1.040691	meptazinol (1.040691) DLEU2
3398	-1.083143	molindone (-1.083143) PDXDC2P	false	-1.083143	molindone (-1.083143) PDXDC2P
1678	-1.232009667	H-7 (-1.232009667) C12orf47	false	-1.232009667	H-7 (-1.232009667) C12orf47
4386	-1.437556	emetine (-1.437556) LINC00341	false	-1.437556	emetine (-1.437556) LINC00341
3712	1.264939	mevalolactone (1.264939) RP11-1148L6.5.1	false	1.264939	mevalolactone (1.264939) RP11-1148L6.5.1
5393	-1.12961	idoxuridine (-1.12961) PDXDC2P	false	-1.12961	idoxuridine (-1.12961) PDXDC2P
4620	-1.040628	metrizamide (-1.040628) IDI2-AS1	false	-1.040628	metrizamide (-1.040628) IDI2-AS1
5092	1.175605	lanatoside C (1.175605) RP11-648L3.2.1	false	1.175605	lanatoside C (1.175605) RP11-648L3.2.1
5587	1.035994	ellipticine (1.035994) KB-1460A1.5.1	false	1.035994	ellipticine (1.035994) KB-1460A1.5.1
4379	-1.013388	emetine (-1.013388) RP11-259N19.1	false	-1.013388	emetine (-1.013388) RP11-259N19.1
4366	1.000299	emetine (1.000299) FGD5-AS1	false	1.000299	emetine (1.000299) FGD5-AS1
5538	-1.109946	sulfathiazole (-1.109946) PDXDC2P	false	-1.109946	sulfathiazole (-1.109946) PDXDC2P
2516	1.124361	gramine (1.124361) RP11-203B9.4.1	false	1.124361	gramine (1.124361) RP11-203B9.4.1
5392	1.092621	idoxuridine (1.092621) ZNRD1-AS1	false	1.092621	idoxuridine (1.092621) ZNRD1-AS1
5482	-1.024687	doxylamine (-1.024687) FAM182A	false	-1.024687	doxylamine (-1.024687) FAM182A
5696	1.04202	trichostatin A (1.04202) RP4-630C24.3.1	false	1.04202	trichostatin A (1.04202) RP4-630C24.3.1
3111	1.30124	simvastatin (1.30124) LINC00667	false	1.30124	simvastatin (1.30124) LINC00667
1706	-1.371368	pseudopelletierine (-1.371368) LL22NC03-2H8.5	false	-1.371368	pseudopelletierine (-1.371368) LL22NC03-2H8.5
3814	1.324768	dicoumarol (1.324768) AC012065.7.1	false	1.324768	dicoumarol (1.324768) AC012065.7.1
2537	-1.003916	flunisolide (-1.003916) RP11-403P17.4.1	false	-1.003916	flunisolide (-1.003916) RP11-403P17.4.1
1638	-1.286803	cefmetazole (-1.286803) LL22NC03-2H8.5	false	-1.286803	cefmetazole (-1.286803) LL22NC03-2H8.5
3845	1.118151	meclofenoxate (1.118151) AC009299.3.1	false	1.118151	meclofenoxate (1.118151) AC009299.3.1
2345	1.046603	conessine (1.046603) RP11-667K14.3	false	1.046603	conessine (1.046603) RP11-667K14.3
3173	1.026187	fosfosal (1.026187) KIR3DP1	false	1.026187	fosfosal (1.026187) KIR3DP1
4311	-1.165278	helveticoside (-1.165278) LINC00342	false	-1.165278	helveticoside (-1.165278) LINC00342
3621	1.141565	pyrithyldione (1.141565) AC005546.2	false	1.141565	pyrithyldione (1.141565) AC005546.2
2104	-1.110124	seneciphylline (-1.110124) DGCR5	false	-1.110124	seneciphylline (-1.110124) DGCR5
5984	1.418636	valproic acid (1.418636) RP11-574K11.5.1	false	1.418636	valproic acid (1.418636) RP11-574K11.5.1
3650	-1.479319	securinine (-1.479319) LL22NC03-2H8.5	false	-1.479319	securinine (-1.479319) LL22NC03-2H8.5
4747	-2.111697	clomifene (-2.111697) RP11-394A14.4	false	-2.111697	clomifene (-2.111697) RP11-394A14.4
4877	1.395245	cyclic adenosine monophosphate (1.395245) RP11-152N13.16	false	1.395245	cyclic adenosine monophosphate (1.395245) RP11-152N13.16
3426	-1.245081	chloroquine (-1.245081) AC005546.2	false	-1.245081	chloroquine (-1.245081) AC005546.2
4817	1.356139	LY-294002 (1.356139) BX004987.5.1	false	1.356139	LY-294002 (1.356139) BX004987.5.1
1656	-1.471389	H-7 (-1.471389) LL22NC03-2H8.5	false	-1.471389	H-7 (-1.471389) LL22NC03-2H8.5
4240	-1.253232	metaraminol (-1.253232) AC005546.2	false	-1.253232	metaraminol (-1.253232) AC005546.2
3894	-1.492866	strophanthidin (-1.492866) WT1-AS	false	-1.492866	strophanthidin (-1.492866) WT1-AS
4584	-1.614147	pepstatin (-1.614147) EGOT	false	-1.614147	pepstatin (-1.614147) EGOT
3937	1.288124	ricinine (1.288124) RP11-612B6.2.1	false	1.288124	ricinine (1.288124) RP11-612B6.2.1
5945	1.5454715	tanespimycin (1.5454715) RP11-667K14.3	false	1.5454715	tanespimycin (1.5454715) RP11-667K14.3
4060	-1.79794175	cephaeline (-1.79794175) MCM3AP-AS1	false	-1.79794175	cephaeline (-1.79794175) MCM3AP-AS1
3335	1.70459	epitiostanol (1.70459) FGD5-AS1	false	1.70459	epitiostanol (1.70459) FGD5-AS1
2335	-1.144218	naftopidil (-1.144218) LINC00483	false	-1.144218	naftopidil (-1.144218) LINC00483
5938	-1.259509	tanespimycin (-1.259509) RP11-152N13.16	false	-1.259509	tanespimycin (-1.259509) RP11-152N13.16
4924	-1.328712	methacholine chloride (-1.328712) RP11-1148L6.5.1	false	-1.328712	methacholine chloride (-1.328712) RP11-1148L6.5.1
3344	1.470898	proscillaridin (1.470898) RP11-203B9.4.1	false	1.470898	proscillaridin (1.470898) RP11-203B9.4.1
5351	1.431093	oxetacaine (1.431093) RP11-499E18.1.1	false	1.431093	oxetacaine (1.431093) RP11-499E18.1.1
5097	1.01261	lanatoside C (1.01261) RP11-395B7.2.1	false	1.01261	lanatoside C (1.01261) RP11-395B7.2.1
4756	1.179469	fluphenazine (1.179469) RP11-403P17.4.1	false	1.179469	fluphenazine (1.179469) RP11-403P17.4.1
2880	1.131989	promethazine (1.131989) RP11-1148L6.5.1	false	1.131989	promethazine (1.131989) RP11-1148L6.5.1
3670	-1.31092	bergenin (-1.31092) RP11-612B6.2.1	false	-1.31092	bergenin (-1.31092) RP11-612B6.2.1
3721	-1.252775	hecogenin (-1.252775) RP11-148B6.1.1	false	-1.252775	hecogenin (-1.252775) RP11-148B6.1.1
4508	-1.157415	digitoxigenin (-1.157415) PLK1S1	false	-1.157415	digitoxigenin (-1.157415) PLK1S1
3182	-1.44568	theobromine (-1.44568) RP3-522P13.3.1	false	-1.44568	theobromine (-1.44568) RP3-522P13.3.1
2928	1.126729	monobenzone (1.126729) AC012065.7.1	false	1.126729	monobenzone (1.126729) AC012065.7.1
2839	-1.4805745	betaxolol (-1.4805745) RP11-1148L6.5.1	false	-1.4805745	betaxolol (-1.4805745) RP11-1148L6.5.1
3603	-1.29881	(+)-chelidonine (-1.29881) AC005546.2	false	-1.29881	(+)-chelidonine (-1.29881) AC005546.2
3314	2.945615	epitiostanol (2.945615) LL22NC03-2H8.5	false	2.945615	epitiostanol (2.945615) LL22NC03-2H8.5
3604	-1.048012	(+)-chelidonine (-1.048012) BX004987.5.1	false	-1.048012	(+)-chelidonine (-1.048012) BX004987.5.1
5327	-1.209284	diflunisal (-1.209284) AC009299.3.1	false	-1.209284	diflunisal (-1.209284) AC009299.3.1
2151	-1.20552	quinisocaine (-1.20552) DGCR11	false	-1.20552	quinisocaine (-1.20552) DGCR11
2213	-1.995388	atovaquone (-1.995388) CASP8AP2	false	-1.995388	atovaquone (-1.995388) CASP8AP2
5529	-1.719975	sulfathiazole (-1.719975) RP3-522P13.3.1	false	-1.719975	sulfathiazole (-1.719975) RP3-522P13.3.1
2527	-1.125179	vincamine (-1.125179) RP11-1148L6.5.1	false	-1.125179	vincamine (-1.125179) RP11-1148L6.5.1
5678	-1.015881	trichostatin A (-1.015881) MEG3	false	-1.015881	trichostatin A (-1.015881) MEG3
5776	-1.01435	colchicine (-1.01435) RP11-473M20.14	false	-1.01435	colchicine (-1.01435) RP11-473M20.14
1534	1.014825	clorgiline (1.014825) CTD-2562J17.7.1	false	1.014825	clorgiline (1.014825) CTD-2562J17.7.1
4258	-1.103681	betonicine (-1.103681) FAM182A	false	-1.103681	betonicine (-1.103681) FAM182A
5265	-1.115277	dipyridamole (-1.115277) RP11-394A14.4	false	-1.115277	dipyridamole (-1.115277) RP11-394A14.4
2738	1.119483	flecainide (1.119483) RP11-667K14.3	false	1.119483	flecainide (1.119483) RP11-667K14.3
3500	-1.233148	benperidol (-1.233148) BX004987.5.1	false	-1.233148	benperidol (-1.233148) BX004987.5.1
3388	1.016282	molindone (1.016282) AD000090.2.1	false	1.016282	molindone (1.016282) AD000090.2.1
4285	-1.009872	lycorine (-1.009872) RP4-564F22.2.1	false	-1.009872	lycorine (-1.009872) RP4-564F22.2.1
3462	2.3965	orciprenaline (2.3965) LL22NC03-2H8.5	false	2.3965	orciprenaline (2.3965) LL22NC03-2H8.5
5594	-1.075941	ellipticine (-1.075941) ZNF518A	false	-1.075941	ellipticine (-1.075941) ZNF518A
1291	-1.095164	CP-863187 (-1.095164) DLEU2	false	-1.095164	CP-863187 (-1.095164) DLEU2
4992	-1.026347	trimethylcolchicinic acid (-1.026347) MEG3	false	-1.026347	trimethylcolchicinic acid (-1.026347) MEG3
3983	1.81607175	thiostrepton (1.81607175) MIR22HG	false	1.81607175	thiostrepton (1.81607175) MIR22HG
2761	-1.599938	azacitidine (-1.599938) RP11-574K11.5.1	false	-1.599938	azacitidine (-1.599938) RP11-574K11.5.1
5771	1.048421	methotrexate (1.048421) RP11-473M20.14	false	1.048421	methotrexate (1.048421) RP11-473M20.14
4405	-1.151944	pirenzepine (-1.151944) RP11-612B6.2.1	false	-1.151944	pirenzepine (-1.151944) RP11-612B6.2.1
1433	2.23426	thapsigargin (2.23426) MIR22HG	false	2.23426	thapsigargin (2.23426) MIR22HG
3824	-1.142049	levonorgestrel (-1.142049) FGD5-AS1	false	-1.142049	levonorgestrel (-1.142049) FGD5-AS1
5410	-1.536701	amprolium (-1.536701) U66059.58.1	false	-1.536701	amprolium (-1.536701) U66059.58.1
4824	1.1787545	LY-294002 (1.1787545) RP11-395B7.2.1	false	1.1787545	LY-294002 (1.1787545) RP11-395B7.2.1
4053	1.198322667	cephaeline (1.198322667) RP11-163O17.1.1	false	1.198322667	cephaeline (1.198322667) RP11-163O17.1.1
5432	1.279064	ticlopidine (1.279064) DLEU2	false	1.279064	ticlopidine (1.279064) DLEU2
5207	1.253076	midecamycin (1.253076) MIR600HG	false	1.253076	midecamycin (1.253076) MIR600HG
3232	1.053538	loracarbef (1.053538) AC006042.6.1	false	1.053538	loracarbef (1.053538) AC006042.6.1
5993	-1.33116	alpha-estradiol (-1.33116) RP11-1148L6.5.1	false	-1.33116	alpha-estradiol (-1.33116) RP11-1148L6.5.1
3652	1.65003	securinine (1.65003) MIR22HG	false	1.65003	securinine (1.65003) MIR22HG
3945	-1.183938	skimmianine (-1.183938) RP11-1148L6.5.1	false	-1.183938	skimmianine (-1.183938) RP11-1148L6.5.1
1424	-1.4208555	thapsigargin (-1.4208555) MCM3AP-AS1	false	-1.4208555	thapsigargin (-1.4208555) MCM3AP-AS1
3923	-1.309249	fluorometholone (-1.309249) LL22NC03-2H8.5	false	-1.309249	fluorometholone (-1.309249) LL22NC03-2H8.5
3069	-1.287156	trimipramine (-1.287156) LL22NC03-2H8.5	false	-1.287156	trimipramine (-1.287156) LL22NC03-2H8.5
3573	-1.384434	hydroxyachillin (-1.384434) RP11-612B6.2.1	false	-1.384434	hydroxyachillin (-1.384434) RP11-612B6.2.1
2314	1.218618	naftopidil (1.218618) LINC00667	false	1.218618	naftopidil (1.218618) LINC00667
1805	-1.000358	desipramine (-1.000358) U47924.30	false	-1.000358	desipramine (-1.000358) U47924.30
3988	-1.141118	serotonin (-1.141118) AC012074.2.1	false	-1.141118	serotonin (-1.141118) AC012074.2.1
1339	1.163009	cyclopenthiazide (1.163009) RP11-1148L6.5.1	false	1.163009	cyclopenthiazide (1.163009) RP11-1148L6.5.1
2324	-1.18951	naftopidil (-1.18951) RP11-170N11.1.1	false	-1.18951	naftopidil (-1.18951) RP11-170N11.1.1
5007	-1.279965	calcium pantothenate (-1.279965) U66059.58.1	false	-1.279965	calcium pantothenate (-1.279965) U66059.58.1
3260	1.097402	ozagrel (1.097402) ZNRD1-AS1	false	1.097402	ozagrel (1.097402) ZNRD1-AS1
1385	-1.4062855	MG-262 (-1.4062855) MCM3AP-AS1	false	-1.4062855	MG-262 (-1.4062855) MCM3AP-AS1
3130	1.308368	trichlormethiazide (1.308368) LINC00667	false	1.308368	trichlormethiazide (1.308368) LINC00667
1836	-1.082833	harmalol (-1.082833) RP11-1148L6.5.1	false	-1.082833	harmalol (-1.082833) RP11-1148L6.5.1
1819	-1.171334	phthalylsulfathiazole (-1.171334) DLEU2	false	-1.171334	phthalylsulfathiazole (-1.171334) DLEU2
4249	-1.11362	flumequine (-1.11362) LL22NC03-2H8.5	false	-1.11362	flumequine (-1.11362) LL22NC03-2H8.5
1847	1.074089	allantoin (1.074089) RP11-395B7.2.1	false	1.074089	allantoin (1.074089) RP11-395B7.2.1
4152	-1.001625	flunarizine (-1.001625) RP11-1148L6.5.1	false	-1.001625	flunarizine (-1.001625) RP11-1148L6.5.1
4196	-1.234863	mebendazole (-1.234863) RP11-259N19.1	false	-1.234863	mebendazole (-1.234863) RP11-259N19.1
4637	1.683264	SR-95531 (1.683264) RP11-499E18.1.1	false	1.683264	SR-95531 (1.683264) RP11-499E18.1.1
2289	-1.608913	lumicolchicine (-1.608913) U66059.58.1	false	-1.608913	lumicolchicine (-1.608913) U66059.58.1
2094	1.352493	seneciphylline (1.352493) RP11-474N8.5.1	false	1.352493	seneciphylline (1.352493) RP11-474N8.5.1
4933	1.143402	tonzonium bromide (1.143402) MIR22HG	false	1.143402	tonzonium bromide (1.143402) MIR22HG
2248	-1.220916	canavanine (-1.220916) RP1-302G2.5	false	-1.220916	canavanine (-1.220916) RP1-302G2.5
1596	1.95661	STOCK1N-35215 (1.95661) CECR7	false	1.95661	STOCK1N-35215 (1.95661) CECR7
5641	-1.318344	parthenolide (-1.318344) LL22NC03-2H8.5	false	-1.318344	parthenolide (-1.318344) LL22NC03-2H8.5
3167	1.341171	fosfosal (1.341171) RP11-499E18.1.1	false	1.341171	fosfosal (1.341171) RP11-499E18.1.1
5476	-1.090045	doxylamine (-1.090045) C9orf31	false	-1.090045	doxylamine (-1.090045) C9orf31
3250	-1.112462	roxarsone (-1.112462) LL22NC03-2H8.5	false	-1.112462	roxarsone (-1.112462) LL22NC03-2H8.5
5084	1.687493	benzethonium chloride (1.687493) RP11-612B6.2.1	false	1.687493	benzethonium chloride (1.687493) RP11-612B6.2.1
5485	-1.133391	levodopa (-1.133391) RP11-1148L6.5.1	false	-1.133391	levodopa (-1.133391) RP11-1148L6.5.1
5557	-1.135247	acepromazine (-1.135247) LL22NC03-2H8.5	false	-1.135247	acepromazine (-1.135247) LL22NC03-2H8.5
1794	1.043622	betamethasone (1.043622) RP11-1148L6.5.1	false	1.043622	betamethasone (1.043622) RP11-1148L6.5.1
6019	-1.2451215	estradiol (-1.2451215) AC005546.2	false	-1.2451215	estradiol (-1.2451215) AC005546.2
4255	-1.044955	betonicine (-1.044955) RP5-1184F4.5.1	false	-1.044955	betonicine (-1.044955) RP5-1184F4.5.1
1516	-1.098115	flupentixol (-1.098115) RP11-1148L6.5.1	false	-1.098115	flupentixol (-1.098115) RP11-1148L6.5.1
5365	2.65662	idoxuridine (2.65662) LL22NC03-2H8.5	false	2.65662	idoxuridine (2.65662) LL22NC03-2H8.5
3767	1.041871	sulfanilamide (1.041871) RP11-1148L6.5.1	false	1.041871	sulfanilamide (1.041871) RP11-1148L6.5.1
2889	-1.312671	cantharidin (-1.312671) RP11-106M3.3.1	false	-1.312671	cantharidin (-1.312671) RP11-106M3.3.1
5356	1.2809445	oxetacaine (1.2809445) FGD5-AS1	false	1.2809445	oxetacaine (1.2809445) FGD5-AS1
1364	-2.862179	0316684-0000 (-2.862179) RP11-1148L6.5.1	false	-2.862179	0316684-0000 (-2.862179) RP11-1148L6.5.1
5221	-1.20098	azacyclonol (-1.20098) RP11-394A14.4	false	-1.20098	azacyclonol (-1.20098) RP11-394A14.4
1301	1.194787	irinotecan (1.194787) RP11-18I14.10	false	1.194787	irinotecan (1.194787) RP11-18I14.10
4701	-3.150682	anisomycin (-3.150682) LINC00341	false	-3.150682	anisomycin (-3.150682) LINC00341
4412	-1.236486	betazole (-1.236486) RP11-394A14.4	false	-1.236486	betazole (-1.236486) RP11-394A14.4
3640	-1.05561	gabapentin (-1.05561) RP11-566E18.3.1	false	-1.05561	gabapentin (-1.05561) RP11-566E18.3.1
4888	-1.417206	26-delta prostaglandin J2 (-1.417206) MCM3AP-AS1	false	-1.417206	26-delta prostaglandin J2 (-1.417206) MCM3AP-AS1
4133	1.017102	aminoglutethimide (1.017102) AC006042.6.1	false	1.017102	aminoglutethimide (1.017102) AC006042.6.1
3289	-1.52542	sanguinarine (-1.52542) RP11-49C24.1.1	false	-1.52542	sanguinarine (-1.52542) RP11-49C24.1.1
2658	-1.153028	0179445-0000 (-1.153028) RP11-259N19.1	false	-1.153028	0179445-0000 (-1.153028) RP11-259N19.1
2726	-1.015323	S-propranolol (-1.015323) RP11-152N13.16	false	-1.015323	S-propranolol (-1.015323) RP11-152N13.16
2768	-1.515753333	azacitidine (-1.515753333) MCM3AP-AS1	false	-1.515753333	azacitidine (-1.515753333) MCM3AP-AS1
5372	-1.084985	idoxuridine (-1.084985) RP11-655M14.13.1	false	-1.084985	idoxuridine (-1.084985) RP11-655M14.13.1
1822	-1.069555	deptropine (-1.069555) LL22NC03-2H8.5	false	-1.069555	deptropine (-1.069555) LL22NC03-2H8.5
2461	-1.402591	probenecid (-1.402591) LINC00483	false	-1.402591	probenecid (-1.402591) LINC00483
4939	1.792184	20-aminocephalosporanic acid (1.792184) LINC00667	false	1.792184	20-aminocephalosporanic acid (1.792184) LINC00667
2930	-1.208841	carbachol (-1.208841) RP11-394A14.4	false	-1.208841	carbachol (-1.208841) RP11-394A14.4
1392	1.033096	GW-8510 (1.033096) RP11-649A18.7	false	1.033096	GW-8510 (1.033096) RP11-649A18.7
5362	1.452604	dicycloverine (1.452604) DLEU2	false	1.452604	dicycloverine (1.452604) DLEU2
2974	-1.474042	latamoxef (-1.474042) DLEU2	false	-1.474042	latamoxef (-1.474042) DLEU2
2673	-1.771597	0179445-0000 (-1.771597) PLK1S1	false	-1.771597	0179445-0000 (-1.771597) PLK1S1
4442	-1.063162	amitriptyline (-1.063162) RP11-1376P16.2	false	-1.063162	amitriptyline (-1.063162) RP11-1376P16.2
5204	1.01909	midecamycin (1.01909) RP1-68D18.4.1	false	1.01909	midecamycin (1.01909) RP1-68D18.4.1
2872	1.041446	chrysin (1.041446) RP11-489G11.3.1	false	1.041446	chrysin (1.041446) RP11-489G11.3.1
5872	1.207099	nocodazole (1.207099) RP11-203B9.4.1	false	1.207099	nocodazole (1.207099) RP11-203B9.4.1
4974	-2.105633	trimethylcolchicinic acid (-2.105633) RP11-612B6.2.1	false	-2.105633	trimethylcolchicinic acid (-2.105633) RP11-612B6.2.1
2544	-1.013535	chlorcyclizine (-1.013535) RP11-612B6.2.1	false	-1.013535	chlorcyclizine (-1.013535) RP11-612B6.2.1
5932	-1.249138	deferoxamine (-1.249138) LL22NC03-2H8.5	false	-1.249138	deferoxamine (-1.249138) LL22NC03-2H8.5
3963	1.103244	nifuroxazide (1.103244) MIR22HG	false	1.103244	nifuroxazide (1.103244) MIR22HG
4755	-1.68122	fluphenazine (-1.68122) AC005546.2	false	-1.68122	fluphenazine (-1.68122) AC005546.2
1699	1.397818	acenocoumarol (1.397818) RP11-1148L6.5.1	false	1.397818	acenocoumarol (1.397818) RP11-1148L6.5.1
3497	1.36861	benperidol (1.36861) RP11-499E18.1.1	false	1.36861	benperidol (1.36861) RP11-499E18.1.1
4435	-1.179904	adiphenine (-1.179904) RP11-1148L6.5.1	false	-1.179904	adiphenine (-1.179904) RP11-1148L6.5.1
4514	-2.5966995	digitoxigenin (-2.5966995) AD000090.2.1	false	-2.5966995	digitoxigenin (-2.5966995) AD000090.2.1
3677	-1.013125	carbinoxamine (-1.013125) KCNQ1DN	false	-1.013125	carbinoxamine (-1.013125) KCNQ1DN
5725	2.301374795	trichostatin A (2.301374795) RP11-655M14.13.1	false	2.301374795	trichostatin A (2.301374795) RP11-655M14.13.1
4169	-1.442623	ifenprodil (-1.442623) AC005943.5	false	-1.442623	ifenprodil (-1.442623) AC005943.5
2698	-1.052021	sulfamethoxypyridazine (-1.052021) RP11-1148L6.5.1	false	-1.052021	sulfamethoxypyridazine (-1.052021) RP11-1148L6.5.1
2097	1.199188	seneciphylline (1.199188) U47924.30	false	1.199188	seneciphylline (1.199188) U47924.30
1402	-1.00287	GW-8510 (-1.00287) LINC00342	false	-1.00287	GW-8510 (-1.00287) LINC00342
5955	-1.348430667	tanespimycin (-1.348430667) AC005546.2	false	-1.348430667	tanespimycin (-1.348430667) AC005546.2
2212	-1.011119	atovaquone (-1.011119) RP11-1148L6.5.1	false	-1.011119	atovaquone (-1.011119) RP11-1148L6.5.1
1593	1.123888	STOCK1N-35215 (1.123888) LL22NC03-2H8.5	false	1.123888	STOCK1N-35215 (1.123888) LL22NC03-2H8.5
5091	-1.21408	lanatoside C (-1.21408) PLK1S1	false	-1.21408	lanatoside C (-1.21408) PLK1S1
5528	-1.547642	sulfathiazole (-1.547642) EGOT	false	-1.547642	sulfathiazole (-1.547642) EGOT
4153	1.032711	flunarizine (1.032711) RP11-394A14.4	false	1.032711	flunarizine (1.032711) RP11-394A14.4
4075	-1.08183	digoxin (-1.08183) RP11-667K14.3	false	-1.08183	digoxin (-1.08183) RP11-667K14.3
1881	1.011353	myosmine (1.011353) RP11-667K14.3	false	1.011353	myosmine (1.011353) RP11-667K14.3
5113	1.380034	lanatoside C (1.380034) KB-1460A1.5.1	false	1.380034	lanatoside C (1.380034) KB-1460A1.5.1
5766	1.078421	clopamide (1.078421) KCNQ1DN	false	1.078421	clopamide (1.078421) KCNQ1DN
5146	1.145983	ginkgolide A (1.145983) RP11-403P17.4.1	false	1.145983	ginkgolide A (1.145983) RP11-403P17.4.1
3749	1.006519	isoetarine (1.006519) CTD-2562J17.7.1	false	1.006519	isoetarine (1.006519) CTD-2562J17.7.1
5911	-1.159647	geldanamycin (-1.159647) RP11-1148L6.5.1	false	-1.159647	geldanamycin (-1.159647) RP11-1148L6.5.1
5083	-1.739634	benzethonium chloride (-1.739634) LL22NC03-2H8.5	false	-1.739634	benzethonium chloride (-1.739634) LL22NC03-2H8.5
1282	1.766616	BCB000038 (1.766616) RP11-72I8.1.1	false	1.766616	BCB000038 (1.766616) RP11-72I8.1.1
5889	1.102427	isoconazole (1.102427) AC012074.2.1	false	1.102427	isoconazole (1.102427) AC012074.2.1
2342	-1.227326	roxithromycin (-1.227326) FAM182A	false	-1.227326	roxithromycin (-1.227326) FAM182A
5196	1.142146	baclofen (1.142146) LL22NC03-2H8.5	false	1.142146	baclofen (1.142146) LL22NC03-2H8.5
2534	1.22998	solasodine (1.22998) AC004840.9.1	false	1.22998	solasodine (1.22998) AC004840.9.1
4990	2.132231	trimethylcolchicinic acid (2.132231) FGD5-AS1	false	2.132231	trimethylcolchicinic acid (2.132231) FGD5-AS1
3667	1.366383	bergenin (1.366383) RP11-1148L6.5.1	false	1.366383	bergenin (1.366383) RP11-1148L6.5.1
4494	-1.653355	primaquine (-1.653355) RP11-101E13.5	false	-1.653355	primaquine (-1.653355) RP11-101E13.5
4502	1.186612	primaquine (1.186612) RP11-148G20.1.1	false	1.186612	primaquine (1.186612) RP11-148G20.1.1
2575	1.026581	phentolamine (1.026581) FGD5-AS1	false	1.026581	phentolamine (1.026581) FGD5-AS1
2325	1.4143	naftopidil (1.4143) AD000090.2.1	false	1.4143	naftopidil (1.4143) AD000090.2.1
1771	-1.117124	nilutamide (-1.117124) RP11-612B6.2.1	false	-1.117124	nilutamide (-1.117124) RP11-612B6.2.1
2195	-1.586916	isoxsuprine (-1.586916) EGOT	false	-1.586916	isoxsuprine (-1.586916) EGOT
3766	1.013418	sulfanilamide (1.013418) AC004893.11.1	false	1.013418	sulfanilamide (1.013418) AC004893.11.1
2917	1.382960333	digoxigenin (1.382960333) AC091132.1.1	false	1.382960333	digoxigenin (1.382960333) AC091132.1.1
1668	-1.397227	H-7 (-1.397227) MAP3K14	false	-1.397227	H-7 (-1.397227) MAP3K14
4267	1.391424	lycorine (1.391424) LL22NC03-2H8.5	false	1.391424	lycorine (1.391424) LL22NC03-2H8.5
4468	1.963763	8-azaguanine (1.963763) RP1-68D18.4.1	false	1.963763	8-azaguanine (1.963763) RP1-68D18.4.1
2014	-1.208201	Prestwick-967 (-1.208201) U66059.58.1	false	-1.208201	Prestwick-967 (-1.208201) U66059.58.1
5042	1.626467	etacrynic acid (1.626467) LL22NC03-2H8.5	false	1.626467	etacrynic acid (1.626467) LL22NC03-2H8.5
1583	-1.08722	flucytosine (-1.08722) RP11-1148L6.5.1	false	-1.08722	flucytosine (-1.08722) RP11-1148L6.5.1
1395	-1.302387	GW-8510 (-1.302387) RP11-203B9.4.1	false	-1.302387	GW-8510 (-1.302387) RP11-203B9.4.1
1780	-1.176827	desoxycortone (-1.176827) RP11-1148L6.5.1	false	-1.176827	desoxycortone (-1.176827) RP11-1148L6.5.1
1981	-1.163378	cyclobenzaprine (-1.163378) RP11-612B6.2.1	false	-1.163378	cyclobenzaprine (-1.163378) RP11-612B6.2.1
1309	1.118956	irinotecan (1.118956) CTD-3065J16.9.1	false	1.118956	irinotecan (1.118956) CTD-3065J16.9.1
4073	-1.21193	digoxin (-1.21193) C12orf47	false	-1.21193	digoxin (-1.21193) C12orf47
5706	1.062418	trichostatin A (1.062418) HCP5	false	1.062418	trichostatin A (1.062418) HCP5
1537	1.13281	pyrazinamide (1.13281) RP11-1148L6.5.1	false	1.13281	pyrazinamide (1.13281) RP11-1148L6.5.1
3805	1.077711	guaifenesin (1.077711) RP11-395B7.2.1	false	1.077711	guaifenesin (1.077711) RP11-395B7.2.1
4367	-1.312021	emetine (-1.312021) SNHG14	false	-1.312021	emetine (-1.312021) SNHG14
4842	-1.379892	vorinostat (-1.379892) RP11-403C10.2.1	false	-1.379892	vorinostat (-1.379892) RP11-403C10.2.1
4650	1.178964	carisoprodol (1.178964) RP11-667K14.3	false	1.178964	carisoprodol (1.178964) RP11-667K14.3
5033	1.007991	methylbenzethonium chloride (1.007991) FGD5-AS1	false	1.007991	methylbenzethonium chloride (1.007991) FGD5-AS1
1374	1.4822705	MS-275 (1.4822705) LINC00341	false	1.4822705	MS-275 (1.4822705) LINC00341
4016	-1.079221	menadione (-1.079221) RP11-574K11.5.1	false	-1.079221	menadione (-1.079221) RP11-574K11.5.1
2491	-1.119865	propylthiouracil (-1.119865) AC012065.7.1	false	-1.119865	propylthiouracil (-1.119865) AC012065.7.1
2960	-2.159532	latamoxef (-2.159532) RP11-394A14.4	false	-2.159532	latamoxef (-2.159532) RP11-394A14.4
5769	1.514351	clopamide (1.514351) AC006042.6.1	false	1.514351	clopamide (1.514351) AC006042.6.1
4730	1.114024	suloctidil (1.114024) PLK1S1	false	1.114024	suloctidil (1.114024) PLK1S1
5928	1.083899	indometacin (1.083899) RP11-667K14.3	false	1.083899	indometacin (1.083899) RP11-667K14.3
5650	1.060564	parthenolide (1.060564) RP11-82L18.2.1	false	1.060564	parthenolide (1.060564) RP11-82L18.2.1
3487	-1.513536	benperidol (-1.513536) CASP8AP2	false	-1.513536	benperidol (-1.513536) CASP8AP2
4415	-1.3377	naproxen (-1.3377) LL22NC03-2H8.5	false	-1.3377	naproxen (-1.3377) LL22NC03-2H8.5
2056	1.205466	cefalonium (1.205466) RP11-499E18.1.1	false	1.205466	cefalonium (1.205466) RP11-499E18.1.1
5834	1.318302	chlorzoxazone (1.318302) KCNQ1DN	false	1.318302	chlorzoxazone (1.318302) KCNQ1DN
5564	-1.25799	lobeline (-1.25799) RP11-394A14.4	false	-1.25799	lobeline (-1.25799) RP11-394A14.4
5027	-1.060546	withaferin A (-1.060546) RP11-499E18.1.1	false	-1.060546	withaferin A (-1.060546) RP11-499E18.1.1
2602	1.058184	cloperastine (1.058184) IDI2-AS1	false	1.058184	cloperastine (1.058184) IDI2-AS1
5259	1.230884	chlorhexidine (1.230884) AC006042.6.1	false	1.230884	chlorhexidine (1.230884) AC006042.6.1
2902	-1.240486	metyrapone (-1.240486) LL22NC03-2H8.5	false	-1.240486	metyrapone (-1.240486) LL22NC03-2H8.5
5160	-1.094607	acetylsalicylic acid (-1.094607) AC005546.2	false	-1.094607	acetylsalicylic acid (-1.094607) AC005546.2
1452	1.592303	alsterpaullone (1.592303) RP11-1148L6.5.1	false	1.592303	alsterpaullone (1.592303) RP11-1148L6.5.1
3145	1.211786	trichlormethiazide (1.211786) DLEU2	false	1.211786	trichlormethiazide (1.211786) DLEU2
4230	1.202013	mephenesin (1.202013) RP11-394A14.4	false	1.202013	mephenesin (1.202013) RP11-394A14.4
4349	-1.071809	emetine (-1.071809) AC005546.2	false	-1.071809	emetine (-1.071809) AC005546.2
3526	-1.18252	norcyclobenzaprine (-1.18252) RP3-522P13.3.1	false	-1.18252	norcyclobenzaprine (-1.18252) RP3-522P13.3.1
2256	-1.323972	canavanine (-1.323972) U66059.58.1	false	-1.323972	canavanine (-1.323972) U66059.58.1
2853	-1.476916	bupropion (-1.476916) RP11-1148L6.5.1	false	-1.476916	bupropion (-1.476916) RP11-1148L6.5.1
2747	-1.21494	esculin (-1.21494) LL22NC03-2H8.5	false	-1.21494	esculin (-1.21494) LL22NC03-2H8.5
4770	-1.363877	clozapine (-1.363877) LL22NC03-2H8.5	false	-1.363877	clozapine (-1.363877) LL22NC03-2H8.5
2664	1.144975	0179445-0000 (1.144975) RP11-680F8.4.1	false	1.144975	0179445-0000 (1.144975) RP11-680F8.4.1
3704	-1.01653	cinoxacin (-1.01653) LL22NC03-2H8.5	false	-1.01653	cinoxacin (-1.01653) LL22NC03-2H8.5
3271	2.314234	alprostadil (2.314234) MIR22HG	false	2.314234	alprostadil (2.314234) MIR22HG
5508	1.07989	cimetidine (1.07989) IDI2-AS1	false	1.07989	cimetidine (1.07989) IDI2-AS1
4333	1.136511	sulfabenzamide (1.136511) RP4-669P10.16.1	false	1.136511	sulfabenzamide (1.136511) RP4-669P10.16.1
5584	1.035751	ellipticine (1.035751) RP11-403P17.4.1	false	1.035751	ellipticine (1.035751) RP11-403P17.4.1
1850	-1.139047	octopamine (-1.139047) RP11-612B6.2.1	false	-1.139047	octopamine (-1.139047) RP11-612B6.2.1
5726	1.358336183	trichostatin A (1.358336183) RP11-499E18.1.1	false	1.358336183	trichostatin A (1.358336183) RP11-499E18.1.1
2970	-1.337246	latamoxef (-1.337246) AD000090.2.1	false	-1.337246	latamoxef (-1.337246) AD000090.2.1
1311	2.109413333	irinotecan (2.109413333) SNHG3	false	2.109413333	irinotecan (2.109413333) SNHG3
5689	1.079837	trichostatin A (1.079837) RP11-277L2.5	false	1.079837	trichostatin A (1.079837) RP11-277L2.5
3033	-1.663617	mestranol (-1.663617) EGOT	false	-1.663617	mestranol (-1.663617) EGOT
1705	-1.18559	cinchonidine (-1.18559) LL22NC03-2H8.5	false	-1.18559	cinchonidine (-1.18559) LL22NC03-2H8.5
5385	-1.925747	idoxuridine (-1.925747) RP3-522P13.3.1	false	-1.925747	idoxuridine (-1.925747) RP3-522P13.3.1
4713	-1.010131	ouabain (-1.010131) BX004987.5.1	false	-1.010131	ouabain (-1.010131) BX004987.5.1
1833	-1.337532	lobelanidine (-1.337532) LL22NC03-2H8.5	false	-1.337532	lobelanidine (-1.337532) LL22NC03-2H8.5
1368	1.040023	PHA-00816795 (1.040023) RP11-762H8.1.1	false	1.040023	PHA-00816795 (1.040023) RP11-762H8.1.1
2564	-1.075729	rifabutin (-1.075729) RP11-259N19.1	false	-1.075729	rifabutin (-1.075729) RP11-259N19.1
3585	1.137981	hydroxyachillin (1.137981) RP11-395B7.2.1	false	1.137981	hydroxyachillin (1.137981) RP11-395B7.2.1
5630	-1.11086	dihydroergocristine (-1.11086) DLEU2	false	-1.11086	dihydroergocristine (-1.11086) DLEU2
5273	1.259002	metronidazole (1.259002) CTD-2008P7.8	false	1.259002	metronidazole (1.259002) CTD-2008P7.8
1354	1.165619	triprolidine (1.165619) MAP3K14	false	1.165619	triprolidine (1.165619) MAP3K14
3866	-1.140038	metoprolol (-1.140038) WT1-AS	false	-1.140038	metoprolol (-1.140038) WT1-AS
5870	1.026988	nocodazole (1.026988) FAM182A	false	1.026988	nocodazole (1.026988) FAM182A
3536	1.0907555	cetirizine (1.0907555) CTD-2562J17.7.1	false	1.0907555	cetirizine (1.0907555) CTD-2562J17.7.1
3304	-1.460137	zardaverine (-1.460137) EGOT	false	-1.460137	zardaverine (-1.460137) EGOT
4783	1.306838	monorden (1.306838) RP11-203B9.4.1	false	1.306838	monorden (1.306838) RP11-203B9.4.1
3469	-1.08481	orciprenaline (-1.08481) SNHG3	false	-1.08481	orciprenaline (-1.08481) SNHG3
2169	-1.190295	quinisocaine (-1.190295) AC009299.3.1	false	-1.190295	quinisocaine (-1.190295) AC009299.3.1
2509	1.205155	trihexyphenidyl (1.205155) LL22NC03-2H8.5	false	1.205155	trihexyphenidyl (1.205155) LL22NC03-2H8.5
3439	-1.040716	colistin (-1.040716) RP11-286E11.2.1	false	-1.040716	colistin (-1.040716) RP11-286E11.2.1
1922	-1.109581	clomipramine (-1.109581) LL22NC03-2H8.5	false	-1.109581	clomipramine (-1.109581) LL22NC03-2H8.5
4205	1.014234	camptothecin (1.014234) CTD-3065J16.9.1	false	1.014234	camptothecin (1.014234) CTD-3065J16.9.1
2687	-1.124731	Prestwick-664 (-1.124731) RP11-1148L6.5.1	false	-1.124731	Prestwick-664 (-1.124731) RP11-1148L6.5.1
3787	1.09801	ribostamycin (1.09801) RP11-395B7.2.1	false	1.09801	ribostamycin (1.09801) RP11-395B7.2.1
4284	-1.559037333	lycorine (-1.559037333) MCM3AP-AS1	false	-1.559037333	lycorine (-1.559037333) MCM3AP-AS1
2903	-1.672493	(-)-atenolol (-1.672493) RP11-1148L6.5.1	false	-1.672493	(-)-atenolol (-1.672493) RP11-1148L6.5.1
1619	-1.378853	melatonin (-1.378853) RP11-1148L6.5.1	false	-1.378853	melatonin (-1.378853) RP11-1148L6.5.1
4461	-1.59754	sulfaphenazole (-1.59754) RP11-1148L6.5.1	false	-1.59754	sulfaphenazole (-1.59754) RP11-1148L6.5.1
4806	-1.108489	fulvestrant (-1.108489) MCM3AP-AS1	false	-1.108489	fulvestrant (-1.108489) MCM3AP-AS1
5403	1.276866	amprolium (1.276866) U47924.30	false	1.276866	amprolium (1.276866) U47924.30
4603	-1.217302	pepstatin (-1.217302) RP11-1148L6.5.1	false	-1.217302	pepstatin (-1.217302) RP11-1148L6.5.1
5946	1.155361	tanespimycin (1.155361) RP11-106M3.3.1	false	1.155361	tanespimycin (1.155361) RP11-106M3.3.1
4368	1.109489	emetine (1.109489) AC007319.1.1	false	1.109489	emetine (1.109489) AC007319.1.1
1978	-1.234866	dydrogesterone (-1.234866) FAM182A	false	-1.234866	dydrogesterone (-1.234866) FAM182A
5182	1.425001	danazol (1.425001) LA16c-381G6.1.1	false	1.425001	danazol (1.425001) LA16c-381G6.1.1
4835	1.14088	LY-294002 (1.14088) C11orf95	false	1.14088	LY-294002 (1.14088) C11orf95
1329	-1.029041	semustine (-1.029041) MAP3K14	false	-1.029041	semustine (-1.029041) MAP3K14
5315	-1.013062	amylocaine (-1.013062) AC012074.2.1	true	-1.013062	amylocaine (-1.013062) AC012074.2.1
2140	-1.155915	corynanthine (-1.155915) C9orf31	false	-1.155915	corynanthine (-1.155915) C9orf31
5295	1.090608	metronidazole (1.090608) RP11-445H22.3.1	false	1.090608	metronidazole (1.090608) RP11-445H22.3.1
2005	1.296006	Prestwick-967 (1.296006) LINC00667	false	1.296006	Prestwick-967 (1.296006) LINC00667
5713	2.226047	trichostatin A (2.226047) RP11-72I8.1.1	false	2.226047	trichostatin A (2.226047) RP11-72I8.1.1
2204	1.174703	isoxsuprine (1.174703) ZNRD1-AS1	false	1.174703	isoxsuprine (1.174703) ZNRD1-AS1
3649	-1.078347	securinine (-1.078347) AC159540.1.1	false	-1.078347	securinine (-1.078347) AC159540.1.1
6024	-1.206636	staurosporine (-1.206636) CTA-204B4.6.1	false	-1.206636	staurosporine (-1.206636) CTA-204B4.6.1
5852	-1.236491	ampyrone (-1.236491) RP11-394A14.4	false	-1.236491	ampyrone (-1.236491) RP11-394A14.4
3861	1.106819	medrysone (1.106819) LINC00483	false	1.106819	medrysone (1.106819) LINC00483
5812	-1.516606	glibenclamide (-1.516606) CASP8AP2	false	-1.516606	glibenclamide (-1.516606) CASP8AP2
3842	2.107366	meclofenoxate (2.107366) RP11-612B6.2.1	false	2.107366	meclofenoxate (2.107366) RP11-612B6.2.1
3436	-1.82557	colistin (-1.82557) RP11-612B6.2.1	false	-1.82557	colistin (-1.82557) RP11-612B6.2.1
4509	-1.110693	digitoxigenin (-1.110693) LINC00339	false	-1.110693	digitoxigenin (-1.110693) LINC00339
2036	1.43927	piperine (1.43927) RP11-499E18.1.1	false	1.43927	piperine (1.43927) RP11-499E18.1.1
4432	-1.147301	chloramphenicol (-1.147301) RP11-612B6.2.1	false	-1.147301	chloramphenicol (-1.147301) RP11-612B6.2.1
3116	-1.395315	simvastatin (-1.395315) SNHG3	false	-1.395315	simvastatin (-1.395315) SNHG3
4803	1.174447333	sirolimus (1.174447333) RP11-403P17.4.1	false	1.174447333	sirolimus (1.174447333) RP11-403P17.4.1
5078	-2.0016	pipenzolate bromide (-2.0016) RP11-148B6.1.1	false	-2.0016	pipenzolate bromide (-2.0016) RP11-148B6.1.1
4975	-1.361605	trimethylcolchicinic acid (-1.361605) RP11-655M14.13.1	false	-1.361605	trimethylcolchicinic acid (-1.361605) RP11-655M14.13.1
2102	-1.253058	seneciphylline (-1.253058) RP11-148B6.1.1	false	-1.253058	seneciphylline (-1.253058) RP11-148B6.1.1
3833	-1.019144	levonorgestrel (-1.019144) RP4-564F22.2.1	false	-1.019144	levonorgestrel (-1.019144) RP4-564F22.2.1
2033	-1.178717	piperine (-1.178717) RP11-612B6.2.1	false	-1.178717	piperine (-1.178717) RP11-612B6.2.1
1432	-1.214387	thapsigargin (-1.214387) C11orf95	false	-1.214387	thapsigargin (-1.214387) C11orf95
2732	1.080294	sulfadimidine (1.080294) RP11-395B7.2.1	false	1.080294	sulfadimidine (1.080294) RP11-395B7.2.1
4686	1.136026	anisomycin (1.136026) DLEU2	false	1.136026	anisomycin (1.136026) DLEU2
1629	-1.294146	streptozocin (-1.294146) LL22NC03-2H8.5	false	-1.294146	streptozocin (-1.294146) LL22NC03-2H8.5
5014	1.351383	calcium pantothenate (1.351383) RP11-203B9.4.1	false	1.351383	calcium pantothenate (1.351383) RP11-203B9.4.1
3306	1.01901	zardaverine (1.01901) MIR22HG	false	1.01901	zardaverine (1.01901) MIR22HG
2009	1.084205	Prestwick-967 (1.084205) C8orf51	false	1.084205	Prestwick-967 (1.084205) C8orf51
2631	-1.450564	Prestwick-665 (-1.450564) AC005546.2	false	-1.450564	Prestwick-665 (-1.450564) AC005546.2
5972	-1.259632	haloperidol (-1.259632) DLEU2	false	-1.259632	haloperidol (-1.259632) DLEU2
5474	-1.325351	doxylamine (-1.325351) U66059.58.1	false	-1.325351	doxylamine (-1.325351) U66059.58.1
3748	-1.223037	zomepirac (-1.223037) RP3-522P13.3.1	false	-1.223037	zomepirac (-1.223037) RP3-522P13.3.1
1893	-1.000694	ofloxacin (-1.000694) LL22NC03-2H8.5	false	-1.000694	ofloxacin (-1.000694) LL22NC03-2H8.5
5755	-1.006641	dirithromycin (-1.006641) TUG1	false	-1.006641	dirithromycin (-1.006641) TUG1
3342	-1.11311	epitiostanol (-1.11311) SEMA3B	false	-1.11311	epitiostanol (-1.11311) SEMA3B
3472	-1.286058	orciprenaline (-1.286058) C9orf31	false	-1.286058	orciprenaline (-1.286058) C9orf31
3060	1.146904	indoprofen (1.146904) AD000090.2.1	false	1.146904	indoprofen (1.146904) AD000090.2.1
4151	-1.014419	flunarizine (-1.014419) RP11-1376P16.2	false	-1.014419	flunarizine (-1.014419) RP11-1376P16.2
5577	2.045653	lobeline (2.045653) AC006042.6.1	false	2.045653	lobeline (2.045653) AC006042.6.1
4106	-1.84576	minocycline (-1.84576) AC005943.5	false	-1.84576	minocycline (-1.84576) AC005943.5
3703	1.019271	cinoxacin (1.019271) RP11-203B9.4.1	false	1.019271	cinoxacin (1.019271) RP11-203B9.4.1
1626	-1.116038	verteporfin (-1.116038) LL22NC03-2H8.5	false	-1.116038	verteporfin (-1.116038) LL22NC03-2H8.5
3978	1.528116	thiostrepton (1.528116) DLEU2	false	1.528116	thiostrepton (1.528116) DLEU2
1565	-1.032636	esculetin (-1.032636) AC159540.1.1	false	-1.032636	esculetin (-1.032636) AC159540.1.1
5496	-1.121365	troleandomycin (-1.121365) AC012074.2.1	false	-1.121365	troleandomycin (-1.121365) AC012074.2.1
2261	-2.115224	canavanine (-2.115224) RP3-522P13.3.1	false	-2.115224	canavanine (-2.115224) RP3-522P13.3.1
5964	-1.116948	chlorpromazine (-1.116948) FAM182A	false	-1.116948	chlorpromazine (-1.116948) FAM182A
4693	1.696006	anisomycin (1.696006) CTA-204B4.6.1	false	1.696006	anisomycin (1.696006) CTA-204B4.6.1
4761	1.368525	rosiglitazone (1.368525) RP4-564F22.2.1	false	1.368525	rosiglitazone (1.368525) RP4-564F22.2.1
2307	1.011313	lumicolchicine (1.011313) C11orf95	false	1.011313	lumicolchicine (1.011313) C11orf95
4631	-1.057252	SR-95531 (-1.057252) RP11-474N8.5.1	false	-1.057252	SR-95531 (-1.057252) RP11-474N8.5.1
5383	-1.547062	idoxuridine (-1.547062) EGOT	false	-1.547062	idoxuridine (-1.547062) EGOT
3529	1.101553	norcyclobenzaprine (1.101553) LINC00339	false	1.101553	norcyclobenzaprine (1.101553) LINC00339
2825	1.037062	hycanthone (1.037062) CTD-2562J17.7.1	false	1.037062	hycanthone (1.037062) CTD-2562J17.7.1
4303	1.44941325	helveticoside (1.44941325) AC091132.1.1	false	1.44941325	helveticoside (1.44941325) AC091132.1.1
2177	-1.417168	quinisocaine (-1.417168) RP5-1068E13.3.1	false	-1.417168	quinisocaine (-1.417168) RP5-1068E13.3.1
2184	-2.233151	isoxsuprine (-2.233151) RP11-612B6.2.1	false	-2.233151	isoxsuprine (-2.233151) RP11-612B6.2.1
5937	-1.178402	tanespimycin (-1.178402) RP11-1148L6.5.1	false	-1.178402	tanespimycin (-1.178402) RP11-1148L6.5.1
5320	-1.060051	diflunisal (-1.060051) RP11-148B6.1.1	false	-1.060051	diflunisal (-1.060051) RP11-148B6.1.1
3088	-1.324567	reserpine (-1.324567) DGCR5	false	-1.324567	reserpine (-1.324567) DGCR5
2130	1.169569	corynanthine (1.169569) U47924.30	false	1.169569	corynanthine (1.169569) U47924.30
4063	-1.130222	cephaeline (-1.130222) CASP8AP2	false	-1.130222	cephaeline (-1.130222) CASP8AP2
3574	1.551419	hydroxyachillin (1.551419) CTD-2562J17.7.1	false	1.551419	hydroxyachillin (1.551419) CTD-2562J17.7.1
3553	1.396441	salsolidin (1.396441) CTD-2562J17.7.1	false	1.396441	salsolidin (1.396441) CTD-2562J17.7.1
2988	1.028642	paracetamol (1.028642) AC012074.2.1	false	1.028642	paracetamol (1.028642) AC012074.2.1
3695	2.355212	cicloheximide (2.355212) MAP3K14	false	2.355212	cicloheximide (2.355212) MAP3K14
5342	-1.024094	hydrochlorothiazide (-1.024094) RP11-395B7.2.1	false	-1.024094	hydrochlorothiazide (-1.024094) RP11-395B7.2.1
5853	1.798669	ampyrone (1.798669) RP4-802A10.1	false	1.798669	ampyrone (1.798669) RP4-802A10.1
4784	-1.348538	monorden (-1.348538) LL22NC03-2H8.5	false	-1.348538	monorden (-1.348538) LL22NC03-2H8.5
1919	1.017954	benzylpenicillin (1.017954) RP5-1068E13.3.1	false	1.017954	benzylpenicillin (1.017954) RP5-1068E13.3.1
2499	-1.102871	cinchocaine (-1.102871) IDI2-AS1	false	-1.102871	cinchocaine (-1.102871) IDI2-AS1
4470	-1.296165	8-azaguanine (-1.296165) LINC00342	false	-1.296165	8-azaguanine (-1.296165) LINC00342
4741	-1.125927	chlorprothixene (-1.125927) CROCCP2	false	-1.125927	chlorprothixene (-1.125927) CROCCP2
2185	-1.250362	isoxsuprine (-1.250362) RP11-655M14.13.1	false	-1.250362	isoxsuprine (-1.250362) RP11-655M14.13.1
5491	1.031832	sulpiride (1.031832) AC012074.2.1	false	1.031832	sulpiride (1.031832) AC012074.2.1
4313	1.304792	helveticoside (1.304792) RP11-203B9.4.1	false	1.304792	helveticoside (1.304792) RP11-203B9.4.1
5148	1.053557	dl-alpha tocopherol (1.053557) RP11-667K14.3	false	1.053557	dl-alpha tocopherol (1.053557) RP11-667K14.3
2251	-1.360925	canavanine (-1.360925) RP11-655M14.13.1	false	-1.360925	canavanine (-1.360925) RP11-655M14.13.1
1480	1.477749	scriptaid (1.477749) RP11-20D14.6.1	false	1.477749	scriptaid (1.477749) RP11-20D14.6.1
3194	-1.031201	cefsulodin (-1.031201) RP11-612B6.2.1	false	-1.031201	cefsulodin (-1.031201) RP11-612B6.2.1
4293	-1.302022	helveticoside (-1.302022) RP11-574K11.5.1	false	-1.302022	helveticoside (-1.302022) RP11-574K11.5.1
5822	-1.067682	nimesulide (-1.067682) FAM182A	false	-1.067682	nimesulide (-1.067682) FAM182A
3083	-2.060682	reserpine (-2.060682) RP11-148B6.1.1	false	-2.060682	reserpine (-2.060682) RP11-148B6.1.1
3054	1.424344	indoprofen (1.424344) LINC00667	false	1.424344	indoprofen (1.424344) LINC00667
4548	1.23875	mebhydrolin (1.23875) LINC00339	false	1.23875	mebhydrolin (1.23875) LINC00339
5216	-1.348127	cyproheptadine (-1.348127) CASP8AP2	false	-1.348127	cyproheptadine (-1.348127) CASP8AP2
3898	-1.24702	napelline (-1.24702) RP11-1148L6.5.1	false	-1.24702	napelline (-1.24702) RP11-1148L6.5.1
4594	-1.179309	pepstatin (-1.179309) HCG9	false	-1.179309	pepstatin (-1.179309) HCG9
2087	-1.138554	letrozole (-1.138554) CYP4F8	false	-1.138554	letrozole (-1.138554) CYP4F8
4724	-1.79082	ouabain (-1.79082) LINC00094	false	-1.79082	ouabain (-1.79082) LINC00094
3490	1.275441	benperidol (1.275441) LINC00667	false	1.275441	benperidol (1.275441) LINC00667
5559	-1.050905	acepromazine (-1.050905) RP11-394A14.4	false	-1.050905	acepromazine (-1.050905) RP11-394A14.4
3547	1.055555	salsolidin (1.055555) EGOT	false	1.055555	salsolidin (1.055555) EGOT
1542	-1.086893	Gly-His-Lys (-1.086893) CYP4F8	false	-1.086893	Gly-His-Lys (-1.086893) CYP4F8
4657	-1.110344	carcinine (-1.110344) RP11-148B6.1.1	false	-1.110344	carcinine (-1.110344) RP11-148B6.1.1
3352	-1.702441	proscillaridin (-1.702441) AC159540.1.1	false	-1.702441	proscillaridin (-1.702441) AC159540.1.1
3097	1.125374	reserpine (1.125374) RP11-203B9.4.1	false	1.125374	reserpine (1.125374) RP11-203B9.4.1
3680	1.008052	carbinoxamine (1.008052) LINC00339	false	1.008052	carbinoxamine (1.008052) LINC00339
4647	-1.069218	SR-95531 (-1.069218) LINC00483	false	-1.069218	SR-95531 (-1.069218) LINC00483
1910	-1.079823	etilefrine (-1.079823) LINC00342	false	-1.079823	etilefrine (-1.079823) LINC00342
4188	-1.293164	6-benzylaminopurine (-1.293164) LL22NC03-2H8.5	false	-1.293164	6-benzylaminopurine (-1.293164) LL22NC03-2H8.5
3969	1.132266	tolazamide (1.132266) RP11-148G20.1.1	false	1.132266	tolazamide (1.132266) RP11-148G20.1.1
5620	-1.020787	ajmaline (-1.020787) TUG1	false	-1.020787	ajmaline (-1.020787) TUG1
4953	1.05664	7-aminocephalosporanic acid (1.05664) CTD-2562J17.7.1	false	1.05664	7-aminocephalosporanic acid (1.05664) CTD-2562J17.7.1
3740	1.010964	drofenine (1.010964) RP11-395B7.2.1	false	1.010964	drofenine (1.010964) RP11-395B7.2.1
2659	-1.324398	0179445-0000 (-1.324398) LINC00342	false	-1.324398	0179445-0000 (-1.324398) LINC00342
5471	-1.250867	doxylamine (-1.250867) RP11-286E11.2.1	false	-1.250867	doxylamine (-1.250867) RP11-286E11.2.1
[truncated: 2,771 more rows]
