# Supplementary material for: System level characterization of small molecule drugs and their affected long noncoding RNAs
Source: Aging (Albany NY). 2019 Dec 18;11(24):12428–51. doi: 10.18632/aging.102581 (PMC6949102; doi:10.18632/aging.102581)
Supplement: Supplementary Dataset 2 [file aging-11-102581-s002..xlsx]

## Sheet: Drug Distribution
DrugName	Degree
trichostatin A	87
emetine	46
pepstatin	40
anisomycin	39
idoxuridine	38
lumicolchicine	38
probenecid	37
reserpine	36
mestranol	35
sulfathiazole	34
molindone	34
galantamine	34
H-7	34
pyrimethamine	33
trimethylcolchicinic acid	33
trichlormethiazide	33
lanatoside C	32
mebhydrolin	32
canavanine	32
vorinostat	31
cephaeline	31
benperidol	31
epitiostanol	31
atovaquone	31
isoxsuprine	31
quinisocaine	30
metronidazole	29
irinotecan	29
spectinomycin	28
tanespimycin	26
SR-95531	26
helveticoside	26
hydroxyachillin	26
colistin	26
latamoxef	26
lycorine	25
theophylline	25
naftopidil	25
GW-8510	25
sanguinarine	24
seneciphylline	24
Prestwick-967	24
alsterpaullone	24
LY-294002	23
camptothecin	23
salsolidin	23
doxorubicin	23
0179445-0000	23
0175029-0000	23
amprolium	22
proscillaridin	22
letrozole	22
piperine	22
orciprenaline	21
chlorzoxazone	20
diflunisal	20
ouabain	20
digoxin	20
cefalonium	20
lobeline	19
carcinine	19
digitoxigenin	19
fosfosal	19
digoxigenin	19
doxylamine	18
oxetacaine	18
danazol	18
corynanthine	18
glibenclamide	17
simvastatin	17
conessine	17
calcium pantothenate	16
thiostrepton	16
strophanthidin	16
indoprofen	16
thapsigargin	16
ampyrone	15
parthenolide	15
cimetidine	15
azacyclonol	15
mitoxantrone	15
scriptaid	15
ellipticine	14
chlortetracycline	14
puromycin	14
meclofenoxate	14
luteolin	14
daunorubicin	14
geldanamycin	13
ajmaline	13
piperlongumine	13
midecamycin	13
sirolimus	13
apigenin	13
medrysone	13
cicloheximide	13
norcyclobenzaprine	13
zardaverine	13
(+/-)-catechin	13
cantharidin	13
phenazone	13
chlorhexidine	12
fulvestrant	12
8-azaguanine	12
nifuroxazide	12
alprostadil	12
estradiol	11
thioridazine	11
clindamycin	11
levonorgestrel	11
drofenine	11
azacitidine	11
cyclobenzaprine	11
MG-262	11
tretinoin	10
propantheline bromide	10
solanine	10
menadione	10
proadifen	10
cinoxacin	10
securinine	10
harmine	10
dydrogesterone	10
valproic acid	9
resveratrol	9
dirithromycin	9
primaquine	9
bisacodyl	9
flunixin	9
rifabutin	9
salsolinol	9
MS-275	9
staurosporine	8
clopamide	8
monorden	8
chlorprothixene	8
skimmianine	8
alexidine	8
isoetarine	8
carbinoxamine	8
bergenin	8
gabapentin	8
tocainide	8
STOCK1N-35215	8
chlorpromazine	7
isopropamide iodide	7
clozapine	7
quercetin	7
tetryzoline	7
pridinol	7
ebselen	7
iopamidol	7
hycanthone	7
AG-013608	7
pipenzolate bromide	6
prochlorperazine	6
trifluoperazine	6
pergolide	6
cefalotin	6
napelline	6
metoprolol	6
sulfanilamide	6
hecogenin	6
amrinone	6
nafcillin	6
chrysin	6
zidovudine	6
flecainide	6
(-)-isoprenaline	6
demeclocycline	6
phenoxybenzamine	6
0297417-0002B	6
norfloxacin	6
semustine	6
BCB000038	6
wortmannin	5
nocodazole	5
gliclazide	5
decamethonium bromide	5
withaferin A	5
tonzonium bromide	5
alvespimycin	5
thioguanosine	5
suloctidil	5
sulfaphenazole	5
acacetin	5
metaraminol	5
tropicamide	5
mebendazole	5
minocycline	5
fluorometholone	5
dicoumarol	5
ribostamycin	5
corbadrine	5
zomepirac	5
azlocillin	5
(+)-chelidonine	5
cetirizine	5
cefsulodin	5
procyclidine	5
profenamine	5
flumetasone	5
finasteride	5
ethoxyquin	5
2,6-dimethylpiperidine	5
cinchocaine	5
sitosterol	5
meptazinol	5
roxithromycin	5
minaprine	5
benzylpenicillin	5
imidurea	5
nilutamide	5
spiperone	5
valinomycin	5
lomustine	5
fludrocortisone	4
alpha-estradiol	4
haloperidol	4
indometacin	4
fisetin	4
nimesulide	4
mepacrine	4
debrisoquine	4
colchicine	4
tubocurarine chloride	4
sulpiride	4
miconazole	4
hydrochlorothiazide	4
captopril	4
niclosamide	4
dipyridamole	4
diltiazem	4
acetylsalicylic acid	4
nordihydroguaiaretic acid	4
N-acetyl-L-aspartic acid	4
betulinic acid	4
co-dergocrine mesilate	4
methylbenzethonium chloride	4
L-methionine sulfoximine	4
gibberellic acid	4
troglitazone	4
clomifene	4
ciclosporin	4
chloramphenicol	4
thioproperazine	4
betonicine	4
terfenadine	4
kawain	4
6-benzylaminopurine	4
prilocaine	4
ifenprodil	4
flunarizine	4
bufexamac	4
doxepin	4
diethylcarbamazine	4
bumetanide	4
perhexiline	4
trioxysalen	4
podophyllotoxin	4
guaifenesin	4
cefapirin	4
methazolamide	4
selegiline	4
mometasone	4
betulin	4
pyrvinium	4
quinpirole	4
trimipramine	4
chloropyramine	4
Prestwick-860	4
pilocarpine	4
sulfadimidine	4
fenoprofen	4
solasodine	4
vincamine	4
propylthiouracil	4
ofloxacin	4
octopamine	4
allantoin	4
deptropine	4
cefotiam	4
saquinavir	4
dorzolamide	4
sulfamethizole	4
F0447-0125	4
meglumine	4
6-bromoindirubin-3'-oxime	4
PNU-0293363	4
loxapine	4
CP-863187	4
metformin	3
dexverapamil	3
sulindac	3
mefloquine	3
isoconazole	3
dizocilpine	3
pentetrazol	3
antimycin A	3
ethosuximide	3
aztreonam	3
clotrimazole	3
methotrexate	3
propafenone	3
laudanosine	3
syrosingopine	3
ipratropium bromide	3
acepromazine	3
epivincamine	3
amiloride	3
levodopa	3
ticlopidine	3
amylocaine	3
diphemanil metilsulfate	3
tolazoline	3
trimethobenzamide	3
ethambutol	3
apomorphine	3
cyproheptadine	3
baclofen	3
scopolamine N-oxide	3
tolfenamic acid	3
niflumic acid	3
mycophenolic acid	3
caffeic acid	3
etacrynic acid	3
nicotinic acid	3
7-aminocephalosporanic acid	3
N-acetylmuramic acid	3
propidium iodide	3
genistein	3
metrizamide	3
cefadroxil	3
myricetin	3
carteolol	3
naloxone	3
lynestrenol	3
homatropine	3
imipramine	3
sulfadiazine	3
amitriptyline	3
adiphenine	3
morantel	3
todralazine	3
eldeline	3
halcinonide	3
pramocaine	3
benzamil	3
nifenazone	3
clemizole	3
mephenesin	3
metoclopramide	3
nefopam	3
proglumide	3
ethisterone	3
flavoxate	3
fenoterol	3
telenzepine	3
aminoglutethimide	3
dropropizine	3
isotretinoin	3
dinoprost	3
ricinine	3
delsoline	3
hexestrol	3
cefuroxime	3
mephentermine	3
vidarabine	3
butacaine	3
pyrithyldione	3
boldine	3
chloroquine	3
etamsylate	3
sotalol	3
tracazolate	3
tribenoside	3
roxarsone	3
rimexolone	3
theobromine	3
Prestwick-857	3
paromomycin	3
paracetamol	3
capsaicin	3
sulconazole	3
ethaverine	3
(-)-atenolol	3
promethazine	3
nisoxetine	3
albendazole	3
bupropion	3
fendiline	3
quinidine	3
(+)-isoprenaline	3
ifosfamide	3
Prestwick-1085	3
kaempferol	3
Prestwick-664	3
heliotrine	3
fenbufen	3
etiocholanolone	3
riluzole	3
Prestwick-665	3
cloperastine	3
spiramycin	3
levcycloserine	3
flutamide	3
diethylstilbestrol	3
fenbendazole	3
ethotoin	3
chlorcyclizine	3
CP-320650-01	3
flunisolide	3
pempidine	3
cinchonine	3
gramine	3
trihexyphenidyl	3
canadine	3
tobramycin	3
tolmetin	3
phenformin	3
piperacillin	3
PHA-00851261E	3
astemizole	3
clomipramine	3
pentolonium	3
phthalylsulfathiazole	3
diclofenamide	3
tacrine	3
betamethasone	3
rolipram	3
desoxycortone	3
budesonide	3
butamben	3
ondansetron	3
PF-00562151-00	3
proxymetacaine	3
florfenicol	3
dexibuprofen	3
proxyphylline	3
5155877	3
BAS-012416453	3
AH-23848	3
1,4-chrysenequinone	3
deferoxamine	2
novobiocin	2
dihydroergotamine	2
cinnarizine	2
tremorine	2
methylergometrine	2
hydrastine hydrochloride	2
dihydroergocristine	2
stachydrine	2
physostigmine	2
racecadotril	2
aconitine	2
isocorydine	2
troleandomycin	2
naphazoline	2
prednisone	2
khellin	2
oxybuprocaine	2
pheniramine	2
sulfaguanidine	2
metanephrine	2
edrophonium chloride	2
fusidic acid	2
fusaric acid	2
ginkgolide A	2
atracurium besilate	2
mepenzolate bromide	2
nalidixic acid	2
benzethonium chloride	2
lithocholic acid	2
Trolox C	2
iopanoic acid	2
ioxaglic acid	2
piromidic acid	2
neostigmine bromide	2
yohimbic acid	2
benzathine benzylpenicillin	2
protoveratrine A	2
methacholine chloride	2
glycocholic acid	2
11-deoxy-16,16-dimethylprostaglandin E2	2
15-delta prostaglandin J2	2
16-delta prostaglandin J2	2
17-delta prostaglandin J2	2
18-delta prostaglandin J2	2
19-delta prostaglandin J2	2
rosiglitazone	2
fluphenazine	2
ketoconazole	2
carisoprodol	2
ciprofloxacin	2
azathioprine	2
loperamide	2
benzonatate	2
moxisylyte	2
acetazolamide	2
heptaminol	2
diphenhydramine	2
dexpanthenol	2
diprophylline	2
triflupromazine	2
naproxen	2
betazole	2
triamterene	2
pindolol	2
thalidomide	2
xylometazoline	2
metampicillin	2
sulfamerazine	2
bromopride	2
isosorbide	2
iproniazid	2
trimethoprim	2
salbutamol	2
lisinopril	2
difenidol	2
trazodone	2
homochlorcyclizine	2
dyclonine	2
prednisolone	2
econazole	2
dimenhydrinate	2
bupivacaine	2
pinacidil	2
clemastine	2
ergocalciferol	2
cisapride	2
epiandrosterone	2
ceforanide	2
serotonin	2
tolazamide	2
suxibuzone	2
etanidazole	2
kinetin	2
fluorocurarine	2
terazosin	2
phenazopyridine	2
bepridil	2
bisoprolol	2
hexylcaine	2
alimemazine	2
sulfamonomethoxine	2
glimepiride	2
6-azathymine	2
phenacetin	2
betahistine	2
tiabendazole	2
molsidomine	2
triflusal	2
phenindione	2
sulfasalazine	2
prenylamine	2
scoulerine	2
harmol	2
etofenamate	2
moxonidine	2
ozagrel	2
risperidone	2
torasemide	2
moracizine	2
loracarbef	2
Prestwick-864	2
beclometasone	2
arcaine	2
scopolamine	2
doxazosin	2
rolitetracycline	2
monobenzone	2
pralidoxime	2
metyrapone	2
tyloxapol	2
N-acetyl-L-leucine	2
terguride	2
Prestwick-983	2
oxybutynin	2
guanethidine	2
pimozide	2
mifepristone	2
betaxolol	2
etoposide	2
buflomedil	2
biotin	2
ioversol	2
esculin	2
fluocinonide	2
eucatropine	2
netilmicin	2
ramipril	2
sulfamethoxypyridazine	2
PNU-0230031	2
foliosidine	2
gossypol	2
sulfamethoxazole	2
PNU-0251126	2
atractyloside	2
ketoprofen	2
beta-escin	2
0317956-0000	2
phentolamine	2
mexiletine	2
nialamide	2
phenelzine	2
cefotetan	2
etifenin	2
corticosterone	2
tetroquinone	2
furazolidone	2
trimethadione	2
zalcitabine	2
dantrolene	2
Prestwick-1100	2
parbendazole	2
tinidazole	2
alpha-ergocryptine	2
labetalol	2
iopromide	2
cefixime	2
lorglumide	2
griseofulvin	2
nitrofurantoin	2
isocarboxazid	2
monensin	2
fursultiamine	2
estrone	2
fluspirilene	2
pivampicillin	2
Prestwick-920	2
dapsone	2
adipiodone	2
thiocolchicoside	2
clioquinol	2
desipramine	2
benfluorex	2
hemicholinium	2
buspirone	2
zoxazolamine	2
procaine	2
protriptyline	2
papaverine	2
nicergoline	2
spironolactone	2
alpha-yohimbine	2
lidoflazine	2
dexpropranolol	2
tetrandrine	2
meropenem	2
leflunomide	2
pioglitazone	2
nortriptyline	2
sulfaquinoxaline	2
alclometasone	2
ramifenazone	2
disulfiram	2
ranitidine	2
orlistat	2
C-75	2
flucytosine	2
benserazide	2
articaine	2
STOCK1N-35874	2
STOCK1N-35696	2
Gly-His-Lys	2
hydrocortisone	2
fluvastatin	2
flupentixol	2
hesperidin	2
amikacin	2
alprenolol	2
SB-202190	2
carmustine	2
AG-012559	2
SB-203580	2
mecamylamine	2
SC-19220	2
AR-A014418	2
PHA-00816795	2
isoniazid	2
BCB000040	2
BCB000039	2
verapamil	1
tacrolimus	1
rofecoxib	1
sulindac sulfide	1
iloprost	1
sodium phenylbutyrate	1
TTNPB	1
pirinixic acid	1
gefitinib	1
1,5-isoquinolinediol	1
4,5-dianilinophthalimide	1
nalbuphine	1
dihydrostreptomycin	1
mefexamide	1
clonidine	1
fipexide	1
practolol	1
chlorpropamide	1
mesoridazine	1
etamivan	1
quipazine	1
hexamethonium bromide	1
dicycloverine	1
acebutolol	1
zimeldine	1
bromocriptine	1
oleandomycin	1
paclitaxel	1
lactobionic acid	1
dl-alpha tocopherol	1
atropine oxide	1
chenodeoxycholic acid	1
dequalinium chloride	1
clidinium bromide	1
spaglumic acid	1
pipemidic acid	1
amphotericin B	1
bretylium tosilate	1
8-aminocephalosporanic acid	1
9-aminocephalosporanic acid	1
10-aminocephalosporanic acid	1
11-aminocephalosporanic acid	1
12-aminocephalosporanic acid	1
13-aminocephalosporanic acid	1
14-aminocephalosporanic acid	1
15-aminocephalosporanic acid	1
16-aminocephalosporanic acid	1
17-aminocephalosporanic acid	1
18-aminocephalosporanic acid	1
19-aminocephalosporanic acid	1
20-aminocephalosporanic acid	1
21-aminocephalosporanic acid	1
22-aminocephalosporanic acid	1
mefenamic acid	1
denatonium benzoate	1
methanthelinium bromide	1
demecarium bromide	1
ursolic acid	1
metamizole sodium	1
tranexamic acid	1
3-nitropropionic acid	1
ursodeoxycholic acid	1
atropine methonitrate	1
canrenoic acid	1
folic acid	1
glycopyrronium bromide	1
20-delta prostaglandin J2	1
21-delta prostaglandin J2	1
22-delta prostaglandin J2	1
23-delta prostaglandin J2	1
24-delta prostaglandin J2	1
25-delta prostaglandin J2	1
26-delta prostaglandin J2	1
27-delta prostaglandin J2	1
28-delta prostaglandin J2	1
29-delta prostaglandin J2	1
30-delta prostaglandin J2	1
31-delta prostaglandin J2	1
32-delta prostaglandin J2	1
33-delta prostaglandin J2	1
34-delta prostaglandin J2	1
35-delta prostaglandin J2	1
36-delta prostaglandin J2	1
cyclic adenosine monophosphate	1
pentoxyverine	1
cefalexin	1
lidocaine	1
amoxapine	1
moroxydine	1
hesperetin	1
meticrane	1
carbamazepine	1
isoxicam	1
acetohexamide	1
isoflupredone	1
ivermectin	1
chlorphenamine	1
neomycin	1
pirenzepine	1
hyoscyamine	1
aceclofenac	1
mafenide	1
sulfabenzamide	1
methocarbamol	1
flumequine	1
lincomycin	1
norethisterone	1
glafenine	1
enalapril	1
fenofibrate	1
disopyramide	1
acemetacin	1
naringin	1
colecalciferol	1
pirenperone	1
estropipate	1
cefazolin	1
androsterone	1
domperidone	1
mevalolactone	1
pyridoxine	1
DL-thiorphan	1
harmaline	1
vitexin	1
omeprazole	1
cefaclor	1
terconazole	1
sisomicin	1
trimetazidine	1
10-methoxyharmalan	1
zuclopenthixol	1
asiaticoside	1
talampicillin	1
phensuximide	1
Prestwick-1103	1
carbachol	1
diloxanide	1
urapidil	1
adrenosterone	1
isradipine	1
vinpocetine	1
methylprednisolone	1
praziquantel	1
furosemide	1
chlortalidone	1
brinzolamide	1
vanoxerine	1
SR-95639A	1
naringenin	1
meclozine	1
amiprilose	1
equilin	1
hymecromone	1
eticlopride	1
felbinac	1
S-propranolol	1
tridihexethyl	1
cyclopentolate	1
ronidazole	1
ciprofibrate	1
cycloserine	1
Prestwick-674	1
lomefloxacin	1
hydralazine	1
diphenylpyraline	1
spiradoline	1
chlorambucil	1
orphenadrine	1
tolbutamide	1
furaltadone	1
suprofen	1
rifampicin	1
Prestwick-691	1
4-hydroxyphenazone	1
gelsemine	1
tenoxicam	1
carbarsone	1
fluvoxamine	1
oxamniquine	1
brompheniramine	1
levobunolol	1
memantine	1
metacycline	1
xylazine	1
diflorasone	1
carbenoxolone	1
minoxidil	1
nystatin	1
picrotoxinin	1
famprofazone	1
benfotiamine	1
indapamide	1
oxaprozin	1
thiamazole	1
CP-690334-01	1
bacampicillin	1
ethionamide	1
Prestwick-692	1
sertaconazole	1
riboflavin	1
citalopram	1
pentamidine	1
etilefrine	1
kanamycin	1
droperidol	1
enoxacin	1
tiapride	1
Prestwick-685	1
myosmine	1
palmatine	1
meclocycline	1
(-)-MK-801	1
megestrol	1
benzbromarone	1
maprotiline	1
hydrastinine	1
harmalol	1
lobelanidine	1
isometheptene	1
levopropoxyphene	1
pyrantel	1
prednicarbate	1
alfuzosin	1
amiodarone	1
3-acetylcoumarin	1
flurbiprofen	1
testosterone	1
3-hydroxy-DL-kynurenine	1
timolol	1
mimosine	1
nitrofural	1
erythromycin	1
oxantel	1
metergoline	1
idazoxan	1
propranolol	1
xamoterol	1
amoxicillin	1
butoconazole	1
ampicillin	1
hexetidine	1
cefoperazone	1
remoxipride	1
ceftazidime	1
pizotifen	1
cytisine	1
oxytetracycline	1
hydroquinine	1
tropine	1
dexamethasone	1
trifluridine	1
pseudopelletierine	1
cinchonidine	1
doxycycline	1
noscapine	1
sulfadoxine	1
repaglinide	1
oxprenolol	1
acenocoumarol	1
rotenone	1
anabasine	1
Prestwick-689	1
butirosin	1
abamectin	1
cefmetazole	1
nadide	1
clobetasol	1
streptozocin	1
sulfapyridine	1
pheneticillin	1
verteporfin	1
mesalazine	1
tetrahydroalstonine	1
sulfametoxydiazine	1
amodiaquine	1
melatonin	1
piribedil	1
sulfacetamide	1
oxymetazoline	1
Prestwick-1083	1
raubasine	1
PF-01378883-00	1
PF-00539758-00	1
erastin	1
0225151-0000	1
5707885	1
altretamine	1
oxybenzone	1
prasterone	1
nimodipine	1
nabumetone	1
esculetin	1
Prestwick-981	1
scopoletin	1
Prestwick-972	1
enilconazole	1
5194442	1
PHA-00767505E	1
benzthiazide	1
apramycin	1
pyrazinamide	1
lovastatin	1
methapyrilene	1
clorgiline	1
hydroxyzine	1
methoxsalen	1
famotidine	1
bemegride	1
ciclopirox	1
naftidrofuryl	1
felodipine	1
phenylpropanolamine	1
antazoline	1
berberine	1
oxedrine	1
vinburnine	1
cyproterone	1
levocabastine	1
clorsulon	1
viomycin	1
colforsin	1
0198306-0000	1
PHA-00846566E	1
CAY-10397	1
0316684-0000	1
Prestwick-1084	1
yohimbine	1
ticarcillin	1
cefotaxime	1
triprolidine	1
alfadolone	1
thiamphenicol	1
ketorolac	1
metrifonate	1
lymecycline	1
tranylcypromine	1
fenspiride	1
lansoprazole	1
cyclopenthiazide	1
dilazep	1
fludroxycortide	1
0173570-0000	1
cefamandole	1
merbromin	1
levomepromazine	1
sulfadimethoxine	1
cortisone	1
CP-319743	1
IC-86621	1
CP-645525-01	1
vinblastine	1

## Sheet: lncRNA Distribution
lncRNA	Degree
RP11-1148L6.5.1	366
LL22NC03-2H8.5	363
RP11-612B6.2.1	164
RP11-667K14.3	124
FGD5-AS1	111
MIR22HG	105
DLEU2	103
FAM182A	97
RP11-403P17.4.1	91
CTD-2562J17.7.1	90
RP11-148B6.1.1	87
RP11-395B7.2.1	83
AD000090.2.1	83
AC005546.2	77
RP11-394A14.4	76
RP3-522P13.3.1	72
RP11-203B9.4.1	66
CASP8AP2	62
LINC00483	62
ZNRD1-AS1	60
AC159540.1.1	59
RP11-499E18.1.1	59
LINC00667	59
U66059.58.1	57
AC005943.5	56
MCM3AP-AS1	54
AC012074.2.1	54
LINC00339	53
AC012065.7.1	49
RP11-286E11.2.1	48
EGOT	47
RP11-148G20.1.1	47
SNHG3	47
RP4-564F22.2.1	43
RP11-152N13.16	43
RP11-655M14.13.1	40
DGCR5	40
AC006042.6.1	39
C9orf31	38
LINC00094	36
RP11-517A5.4	36
LINC00342	36
C14orf169	34
RP11-574K11.5.1	34
MAP3K14	34
PDXDC2P	34
RP5-1068E13.3.1	34
KB-1460A1.5.1	32
U47924.30	31
BX004987.5.1	30
RP11-259N19.1	30
RP1-302G2.5	30
RP11-473M20.14	29
CROCCP2	28
RP11-395B7.7.1	27
AC007319.1.1	27
RP11-74N20.1.1	27
RP11-403C10.2.1	27
CTA-204B4.6.1	26
AC009299.3.1	26
KIR3DP1	25
WT1-AS	25
DGCR11	25
LINC00341	24
RP11-566E18.3.1	24
RP11-170N11.1.1	24
RP11-49C24.1.1	23
PLK1S1	23
MEG3	23
C12orf47	21
C11orf95	21
CYP4F8	21
RP11-72I8.1.1	20
RP11-499P20.2.1	19
SEMA3B	19
RP11-101E13.5	18
RP11-163O17.1.1	18
CECR7	17
RP5-1184F4.5.1	17
ZNF518A	17
LINC00338	16
RP11-1376P16.2	15
KCNQ1DN	14
RP4-802A10.1	14
AC091132.1.1	13
RP11-474N8.5.1	13
IDI2-AS1	13
IGF2-AS	12
RP11-617F23.1.1	11
HLA-F-AS1	10
RP11-680F8.4.1	10
RP11-20D14.6.1	10
RP11-649A18.7	10
AC004840.9.1	9
RP4-669P10.16.1	9
RP11-82L18.2.1	9
RP11-762H8.1.1	9
AC004447.2	9
RP11-20I23.8.1	9
SMAD5-AS1	8
NEAT1	8
RP11-348N5.7	7
RP1-68D18.4.1	7
UBXN8	7
C8orf51	6
TUG1	6
KB-1592A4.15.1	6
SNHG14	6
TP53TG1	6
ABO	6
RP11-429B14.4.1	5
LA16c-381G6.1.1	5
LINC00965	5
CTC-428G20.3.1	5
RP11-648L3.2.1	5
SEC22B	5
MT1P3	5
HCG9	4
KB-431C1.4.1	4
RP11-977G19.11.1	4
RP11-255C15.3.1	4
ZBTB20-AS2	4
RP11-405O10.2.1	4
RP11-106M3.3.1	4
AC084219.3	4
LINC00312	3
AP006222.2.1	3
CTD-3065J16.9.1	3
C21orf77	2
HCP5	2
CEBPA-AS1	2
RP11-118B22.2.1	2
RP11-445H22.3.1	2
MIR600HG	2
AL928768.3.1	2
CTD-2008P7.8	2
CTB-55O6.4	2
RP11-18I14.10	2
JRK	2
ATXN8OS	2
AC004893.11.1	2
MCF2L-AS1	2
RP4-724E16.2.1	2
LINC00302	1
RP1-223E5.4.1	1
SRD5A2	1
C6orf124	1
MYCNOS	1
RP13-514E23.1.1	1
ZNF205-AS1	1
CTD-2303B20.1.1	1
RP11-617D20.1.1	1
LINC00472	1
RP4-630C24.3.1	1
RP11-44F21.3.1	1
RP11-57H14.4.1	1
RP11-769O8.1	1
RP11-277L2.5	1
C6orf208	1
RP11-553L6.5.1	1
RP11-492E3.1.1	1
TTTY14	1
C8orf71	1
RP11-489G11.3.1	1
GUSBP11	1
AC007389.3.1	1
RP11-119F7.5.1	1
RP11-84C10.2.1	1
MMP12	1
AC069513.3.1	1
DTX2P1-UPK3BP1-PMS2P11	1
C4orf10	1
RP11-181G12.2.1	1
